# Supplementary material for: Dimethylamino-iodine( iii )/PPh 3 -mediated synthesis of α-ketoamides from glyoxylic acids
Source: Royal Society of Chemistry journal article supplement (doi:10.1039/d5qo01675d), 2026-01-01

## Dimethylamino-Iodine(III)/PPh<sub>3</sub>-Mediated Synthesis of $\alpha$ -

### Ketoamides from Glyoxylic Acids

Dan Xiao,<sup>a</sup> Jiaxin He,<sup>a</sup> Kaiyue Yang,<sup>a</sup> Zhijian Wang,<sup>a</sup> Cong Li,<sup>a</sup> and Yunfei Du<sup>a\*</sup>

---

<sup>a</sup> *Tianjin Key Laboratory for Modern Drug Delivery & High-Efficiency, School of Pharmaceutical Science and Technology, Faculty of Medicine, Tianjin University, Tianjin 300072, China.*

Corresponding author' email: [duyunfeier@tju.edu.cn](mailto:duyunfeier@tju.edu.cn)

## Supporting Information

### List of Contents

|              |                                                                            |          |
|--------------|----------------------------------------------------------------------------|----------|
| <b>I.</b>    | General Information                                                        | S1       |
| <b>II.</b>   | General Procedure for the Preparation of <b>DMI</b> and Starting Materials | S2-S7    |
| <b>III.</b>  | General Procedure for Dimethylation of Glyoxylic acids                     | S8-S19   |
| <b>IV.</b>   | General Procedure for Amination in One Pot                                 | S20-S21  |
| <b>V.</b>    | Mechanistic Studies                                                        | S22-S23  |
| <b>VI.</b>   | X-Ray Diffraction Data of <b>DMI</b>                                       | S24-S27  |
| <b>VII.</b>  | Reference                                                                  | S28-S29  |
| <b>VIII.</b> | NMR Spectra of Starting Materials and Products                             | S30-S129 |

## I. General Information

$^1\text{H}$ ,  $^{13}\text{C}$  and  $^{19}\text{F}$  NMR spectra were recorded on a 400 MHz or 600 MHz spectrometer at 25 °C. Chemical shifts values are given in ppm and referred as the internal standard to TMS: 0.00 ppm. Chemical shifts were expressed in parts per million ( $\delta$ ) downfield from the internal standard tetramethylsilane, and were reported as s (singlet), d (doublet), t (triplet), q (quadruple), dd (doublet of doublet), m (multiplet), etc. The coupling constants  $J$ , are reported in Hertz (Hz). High resolution mass spectrometry (HRMS) data were recorded on Q Exactive HF (Q Exactive™ HF/UlitiMate™ 3000 RSLCnano) using electron spray ionization (ESI) in positive (or negative) mode. Melting points were determined with a Micromelting point apparatus. TLC plates were visualized by exposure to ultraviolet light.

Reagents and solvents were purchased as reagent grade and were used without further purification. All reactions were performed in standard glassware, heated at 70 °C for 3 h before used. Flash column chromatography was performed over silica gel (200-300 m) using a mixture of ethyl acetate (EA) and petroleum ether (PE).

## II. General Procedure for the Preparation of DMI and Starting Materials

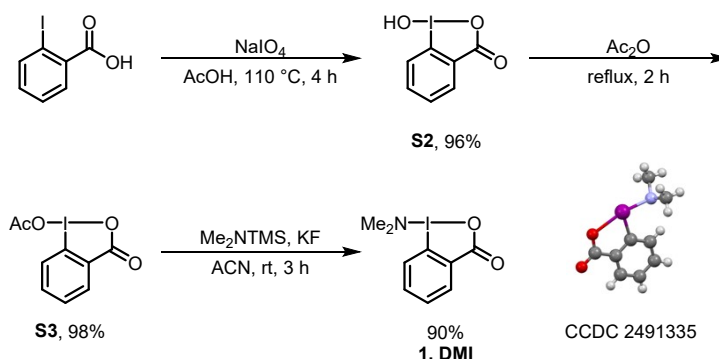

**S3** was prepared according to the literature procedure.<sup>1</sup>

**Preparation of S2:** To a 500 mL round-bottomed flask equipped with a stirrer bar was added 2-iodobenzoic acid **S1** (8.0 g, 32.2 mmol, 1.0 equiv), 2-iodobenzamide  $\text{NaIO}_4$  (7.24 g, 33.8 mmol, 1.0 equiv), and 30% (v:v) aq.  $\text{AcOH}$  (48 mL) under air. The mixture was vigorously stirred at  $120\text{ }^\circ\text{C}$  and refluxed. After stirring for 4 h, the reaction mixture was cooled to room temperature and diluted with cold water (180 mL), protecting it from light. The mixture was then filtered and further washed with ice water and cold acetone, air dried in the dark overnight to give the pure compound **S2** (8.5 g, 95%) as a white solid. It is a known compound<sup>1</sup> which is used directly for the next step.

**Preparation of S3:** To a 500 mL round-bottomed flask equipped with a stirrer bar was added compound **S2** (8.5 g, 32.2 mmol, 1.0 equiv) and acetic anhydride (30 mL). Then the reaction mixture was stirred and reflux at  $110\text{ }^\circ\text{C}$ . Until the solution turned clear (without suspension), reaction was cool down to room temperature and white crystals started to form. The crystallization was continued at  $-18\text{ }^\circ\text{C}$ . The crystals were then collected and dried overnight under high vacuum to give compound **S3** (8.5 g, 86%) as a yellow solid.  $^1\text{H}$  NMR (400 MHz,  $\text{CDCl}_3$ )  $\delta$  8.25 (dd,  $J = 7.6, 1.6\text{ Hz}$ , 1H), 8.00 (dd,  $J = 8.3, 1.0\text{ Hz}$ , 1H), 7.96 – 7.90 (m, 1H), 7.71 (m, 1H), 2.25 (s, 3H). It is a known compound; the spectra data is in agreement with the reported one.<sup>1</sup>

**Preparation of DMI:** To a 150 mL two-necked round-bottomed flask equipped with a stirrer bar were added compound **S3** (1.00 g, 3.28 mmol, 1.00 equiv),  $\text{KF}$  (19.1 mg, 0.33 mmol, 0.1 equiv) and  $\text{ACN}$  (30 mL) under  $\text{N}_2$  atmosphere, followed by the careful addition of  $\text{TMSNMe}_2$  (4.9 mol, 0.78 mL, 1.5 equiv). The reaction mixture was stirred at room temperature for 3 h in the dark. After the completion of the reaction, the precipitate was filtered and washed with  $\text{Et}_2\text{O}$  (5 mL x 3) to give product **DMI** (0.86 g) in 90% yield as a yellow solid; mp:  $123\text{--}125\text{ }^\circ\text{C}$ .  $^1\text{H}$  NMR (400 MHz,  $\text{CDCl}_3$ )  $\delta$  8.29 (dd,  $J = 7.5, 1.6\text{ Hz}$ , 1H), 7.93 (dd,  $J = 8.2, 1.0\text{ Hz}$ , 1H), 7.76 (m, 1H), 7.60 (td,  $J = 7.3, 1.0\text{ Hz}$ , 1H), 3.44 (s, 6H).  $^{13}\text{C}$  NMR (101 MHz,  $\text{CDCl}_3$ )  $\delta$  168.1, 133.5, 132.6, 132.6, 130.4, 125.2, 117.4, 77.2, 49.6. HRMS (ESI) calcd. for

$C_9H_{11}INO_2^+$   $[M + H^+]$  291.9756, found 291.9833.

## Procedure A

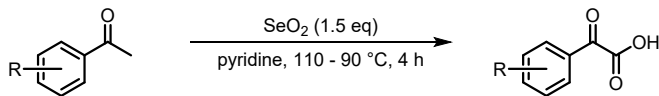

The  $\alpha$ -keto acids were synthesized through the oxidation of corresponding methyl ketones with  $SeO_2$  according to the literature procedure.<sup>2</sup>

In a dry, single-neck, 25-mL, round-bottom flask equipped with a stir bar and flushed with nitrogen, the substituted aryl-methylketone (5.0 mmol) and selenium dioxide ( $SeO_2$ , 0.835 g, 7.5 mmol, 1.5 equiv) were added followed by anhydrous pyridine (20 mL). The reaction mixture was heated in an oil bath to 110 °C for 1 h, and then the bath temperature was reduced to 90 °C. The mixture was stirred at this temperature (90 °C) for an additional 4 h, and progress of the reaction was monitored by TLC. After completion of the reaction, as determined by TLC, the solution containing precipitated selenium was filtered using a Buckner funnel, and the residue was washed with EA (50 mL). The combined filtrate was treated with 1N HCl (20 mL), the organic layer was separated, and the aqueous layer was extracted with EA (3  $\times$  50 mL). The organic layers were combined and treated with 1N NaOH (50 mL), and the aqueous layer was separated. The organic layer was extracted with water (25 mL) and the combined aqueous layers were acidified using 1N HCl to about pH 1.5. The mixture was extracted with EA (3  $\times$  50 mL), and the combined organic layers were dried (anhydrous  $Na_2SO_4$ ) and concentrated on a rotary evaporator. The arylglyoxylic acid product was obtained and used directly for the next step.

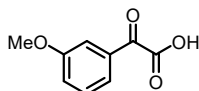

**2h**

2-(3-Methoxyphenyl)-2-oxoacetic acid (**2h**) was obtained as a white solid (621 mg, 69% yield);  $^1H$  NMR (400 MHz,  $DMSO-d_6$ )  $\delta$  7.57 – 7.48 (m, 2H), 7.41 (dd,  $J$  = 2.7, 1.5 Hz, 1H), 7.36 – 7.32 (m, 1H), 3.83 (s, 3H). It is a known compound; the spectra data is in agreement with the reported one.<sup>2</sup>

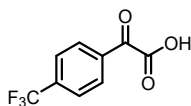

**2i**



2-Oxo-2-(4-(trifluoromethyl)phenyl)acetic acid (**2i**) was obtained as a white solid (665 mg, 61% yield);  $^1\text{H}$  NMR (400 MHz,  $\text{DMSO}-d_6$ )  $\delta$  8.16 (d,  $J$  = 8.1 Hz, 2H), 7.96 (d,  $J$  = 7.7 Hz, 2H). It is a known compound; the spectra data is in agreement with the reported one.<sup>3</sup>

## Procedure B

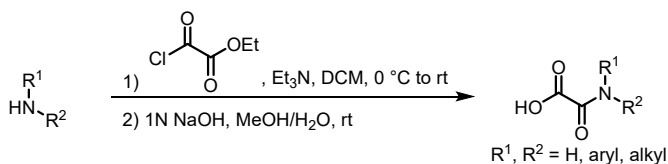

In a dry, single-neck, 25-mL, round-bottom flask equipped with a stir bar and flushed with nitrogen at  $0\text{ }^\circ\text{C}$ , to a solution of ethyl oxalyl chloride (1.0 g, 7.5 mmol, 1.5 equiv) in DCM (15 mL) was added a mixture of amino substrate (5.0 mmol) and  $\text{Et}_3\text{N}$  (0.76 g, 7.5 mmol, 1.5 equiv) in DCM (5 mL). The reaction mixture was stirred at room temperature for 5 h, and progress of the reaction was monitored by TLC. After completion of the reaction, as determined by TLC, the reaction was quenched by saturated aqueous  $\text{NaHCO}_3$  at  $0\text{ }^\circ\text{C}$  and then was extracted with DCM ( $3 \times 50\text{ mL}$ ). The combined organic layers were dried (anhydrous  $\text{Na}_2\text{SO}_4$ ) and concentrated on a rotary evaporator. The crude product was used directly for the next step.

The crude product was dissolved in MeOH/ $\text{H}_2\text{O}$  (20 mL, v/v = 1:1), followed by addition of aqueous 1N NaOH. The resulting mixture was stirred at room temperature for an additional 6 h and progress of the reaction was monitored by TLC. After completion of the reaction, as determined by TLC, the reaction was poured into  $\text{H}_2\text{O}$  (20 mL) and then extracted with EA ( $3 \times 30\text{ mL}$ ). The aqueous layer was acidified using 1N HCl to about pH 1.5. The mixture was extracted with EA ( $3 \times 30\text{ mL}$ ), and the combined organic layers were dried (anhydrous  $\text{Na}_2\text{SO}_4$ ) and concentrated on a rotary evaporator. The arylglyoxylic acid product was obtained and used directly for the next step.

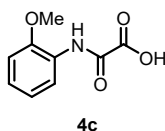

2-((2-Methoxyphenyl)amino)-2-oxoacetic acid (**4c**) was obtained as a white solid (741 mg, 76% yield over two steps);  $^1\text{H}$  NMR (400 MHz,  $\text{DMSO}-d_6$ )  $\delta$  9.62 (s, 1H), 8.07 (dt,  $J$  = 7.9, 1.2 Hz, 1H), 7.22 – 7.07 (m, 2H), 6.98 (td,  $J$  = 7.6, 1.6 Hz, 1H), 3.88 (s, 3H).  $^{13}\text{C}$  NMR (101 MHz,  $\text{DMSO}-d_6$ )  $\delta$  161.8, 155.6, 149.1, 125.7, 125.4, 120.5, 120.1, 111.2, 55.9. It is a known compound; the spectra data is in agreement with the reported one.<sup>4</sup>

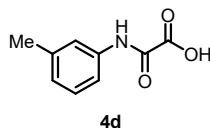

2-Oxo-2-(*m*-tolylamino)acetic acid (**4d**) was obtained as a yellow solid (653 mg, 73% yield over two steps);  $^1\text{H}$  NMR (400 MHz,  $\text{DMSO-}d_6$ )  $\delta$  10.58 (s, 1H), 7.59 (d,  $J$  = 2.0 Hz, 1H), 7.56 – 7.51 (m, 1H), 7.22 (t,  $J$  = 7.8 Hz, 1H), 6.95 (d,  $J$  = 7.5 Hz, 1H), 2.29 (s, 3H). It is a known compound; the spectra data is in agreement with the reported one.<sup>4</sup>

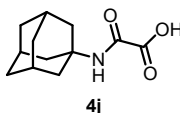

2-(((3s,5s,7s)-Adamantan-1-yl)amino)-2-oxoacetic acid (**4j**) was obtained as a yellow solid (792 mg, 71% yield over two steps);  $^1\text{H}$  NMR (400 MHz,  $\text{DMSO-}d_6$ )  $\delta$  7.86 (s, 1H), 2.05 – 1.99 (m, 3H), 1.95 (d,  $J$  = 2.9 Hz, 6H), 1.62 (t,  $J$  = 3.0 Hz, 6H). HRMS (ESI) calcd. for  $\text{C}_{12}\text{H}_{18}\text{NO}_3^+$  [ $\text{M} + \text{H}^+$ ] 224.1208, found 224.1217.

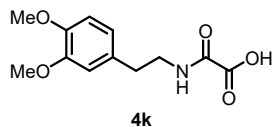

2-((3,4-Dimethoxyphenethyl)amino)-2-oxoacetic acid (**4k**) was obtained as a white solid (873 mg, 69% yield over two steps);  $^1\text{H}$  NMR (400 MHz,  $\text{DMSO-}d_6$ )  $\delta$  8.70 (t,  $J$  = 6.0 Hz, 1H), 6.84 (d,  $J$  = 8.2 Hz, 1H), 6.78 (d,  $J$  = 2.0 Hz, 1H), 6.69 (dd,  $J$  = 8.2, 2.0 Hz, 1H), 3.72 (d,  $J$  = 5.7 Hz, 6H), 3.40 – 3.29 (m, 2H), 2.71 (t,  $J$  = 7.3 Hz, 2H).  $^{13}\text{C}$  NMR (101 MHz,  $\text{DMSO-}d_6$ )  $\delta$  159.8, 148.6, 147.2, 131.5, 120.4, 112.5, 111.9, 55.9, 55.3, 40.3, 34.1. HRMS (ESI) calcd. for  $\text{C}_{12}\text{H}_{16}\text{NO}_5^+$  [ $\text{M} + \text{H}^+$ ] 254.0950, found 254.0968.

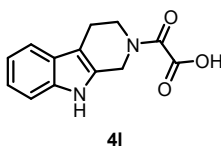

2-Oxo-2-(1,3,4,9-tetrahydro-2*H*-pyrido[3,4-*b*]indol-2-yl)acetic acid (**4l**) was obtained as a yellow solid (952 mg, 78% yield over two steps);  $^1\text{H}$  NMR (400 MHz,  $\text{DMSO-}d_6$ )  $\delta$  10.88 (s, 1H), 7.41 (dd,  $J$  = 7.8, 4.5 Hz, 1H), 7.33 (d,  $J$  = 8.0 Hz, 1H), 7.15 – 7.04 (m, 1H), 6.98 (td,  $J$  = 7.5, 2.3 Hz, 1H), 4.68 (m, 2H), 3.79 (m, 2H), 2.76 (m, 2H).  $^{13}\text{C}$  NMR (101 MHz,  $\text{DMSO-}d_6$ )  $\delta$  164.9, 164.8, 162.4, 161.9, 136.0, 136.0, 129.69,

129.6, 126.4, 126.4, 121.2, 121.1, 118.7, 118.7, 117.7, 117.6, 111.2, 111.2, 106.9, 106.3, 44.0, 43.5, 38.9, 21.5, 20.3. HRMS (ESI) calcd. for  $C_{13}H_{13}N_2O_3^+$  [ $M + H^+$ ] 245.0848, found 245.0845.

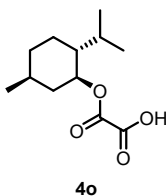

2-(((1*S*,2*R*,5*S*)-2-isopropyl-5-methylcyclohexyl)oxy)-2-oxoacetic acid (**4o**) was obtained as a white solid (866 mg, 76% yield over two steps);  $^1H$  NMR (600 MHz,  $DMSO-d_6$ )  $\delta$  4.71 (td,  $J$  = 10.9, 4.4 Hz, 1H), 1.91 (dt,  $J$  = 11.8, 4.2 Hz, 1H), 1.80 (m, 1H), 1.65 (dt,  $J$  = 13.6, 3.3 Hz, 2H), 1.55 – 1.41 (m, 2H), 1.06 (m, 2H), 0.87 (dd,  $J$  = 14.6, 6.7 Hz, 7H), 0.73 (d,  $J$  = 7.0 Hz, 3H).  $^{13}C$  NMR (151 MHz,  $DMSO-d_6$ )  $\delta$  159.7, 159.0, 75.9, 46.2, 33.5, 30.8, 25.9, 23.1, 21.7, 20.3, 16.2. HRMS (ESI) calcd. for  $C_{12}H_{21}O_4^+$  [ $M + H^+$ ] 229.1362, found 229.1378.

## Procedure C

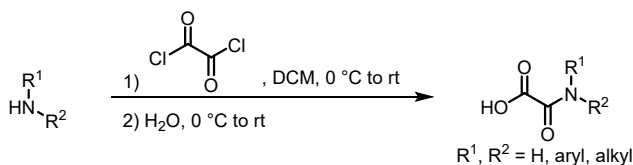

In a dry, single-neck, 25-mL, round-bottom flask equipped with a stir bar and flushed with nitrogen at 0 °C, to a solution of oxalyl chloride (0.95 g, 7.5 mmol, 1.5 equiv) in DCM (15 mL) was added a solution of amino substrate (5.0 mmol) in DCM (5 mL). The reaction mixture was stirred at room temperature for 2 h, and progress of the reaction was monitored by TLC. After completion of the reaction, as determined by TLC, the reaction was quenched by saturated  $H_2O$  (1 mL) at 0 °C. The mixture was then filtered and further washed with ice water, air dried overnight to give the desired compound.

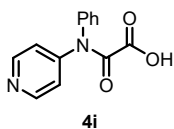

2-Oxo-2-(phenyl(pyridin-4-yl)amino)acetic acid (**4i**) was obtained as a yellow solid (799 mg, 66% yield over two steps);  $^1H$  NMR (600 MHz,  $DMSO-d_6$ )  $\delta$  8.83 – 8.79 (m, 2H), 7.77 – 7.72 (m, 2H), 7.62 – 7.57 (m, 3H), 7.55 (dd,  $J$  = 8.0, 1.9 Hz, 2H).  $^{13}C$  NMR (151 MHz,  $DMSO-d_6$ )  $\delta$  163.2, 162.0, 153.7, 143.1,

136.8, 130.4, 130.3, 129.5, 118.9. HRMS (ESI) calcd. for  $C_{13}H_{11}N_2O_3^+$  [ $M + H^+$ ] 243.0691, found 243.0709.

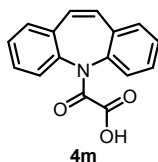

2-(5*H*-Dibenzo[*b,f*]azepin-5-yl)-2-oxoacetic acid (**4m**) was obtained as a white solid (1.02 g, 77% yield over two steps);  $^1H$  NMR (400 MHz,  $DMSO-d_6$ )  $\delta$  7.50 (m, 6H), 7.45 – 7.39 (m, 2H), 7.06 (s, 2H). HRMS (ESI) calcd. for  $C_{16}H_{12}NO_3^+$  [ $M + H^+$ ] 266.0739, found 266.0751.

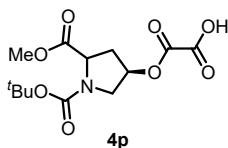

2-(((3*R*)-1-(*tert*-Butoxycarbonyl)-5-(methoxycarbonyl)pyrrolidin-3-yl)oxy)-2-oxoacetic acid (**4p**) was obtained as a white solid (919 mg, 58% yield over two steps);  $^1H$  NMR (600 MHz,  $DMSO-d_6$ )  $\delta$  5.32 (dt,  $J = 7.0, 2.4$  Hz, 1H), 4.32 – 4.21 (m, 1H), 3.67 (d,  $J = 12.4$  Hz, 3H), 3.53 (dq,  $J = 12.4, 3.3, 2.5$  Hz, 1H), 2.49 – 2.41 (m, 1H), 2.22 (m, 1H), 1.37 (d,  $J = 32.7$  Hz, 9H), 1.10 (dd,  $J = 13.1, 6.2$  Hz, 1H).  $^{13}C$  NMR (151 MHz,  $DMSO-d_6$ )  $\delta$  172.6, 172.1, 158.8, 158.7, 153.4, 152.7, 79.7, 79.6, 74.6, 74.0, 64.9, 57.3, 57.0, 52.0, 52.0, 51.6, 51.4, 35.4, 34.5, 27.9, 27.8, 27.8, 15.1. HRMS (ESI) calcd. for  $C_{13}H_{20}NO_8^+$  [ $M + H^+$ ] 318.1111, found 318.1156.

### III. General Procedure for Dimethylamination of Glyoxylic Acids

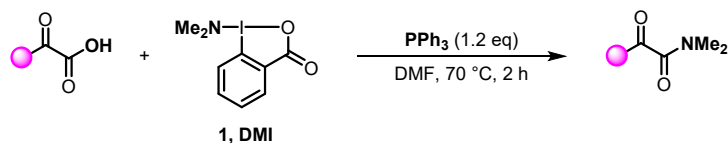

Glyoxylic acids (0.4 mmol), **DMI** (140 mg, 0.48 mmol, 1.2 equiv) and PPh<sub>3</sub> (126 mg, 0.48 mmol, 1.2 equiv) were placed in a 10 ml two-neck rounded bottom flask, and DMF (2.0 mL) was added. The reaction flask was placed in an oil bath and heated up to 70 °C. After substrate was fully consumed, the reaction was quenched with H<sub>2</sub>O (10 mL) and extracted with EA (20 mL x 3). The combined organic layer was washed with brine, dried over anhydrous Na<sub>2</sub>SO<sub>4</sub>, and concentrated in vacuo to afford the crude product, which was then purified by silica gel flash chromatography to give the corresponding products.

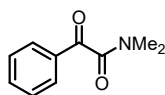

**3a**

*N,N*-Dimethyl-2-oxo-2-phenylacetamide (**3a**) was isolated by column chromatography (PE/EA = 4:1) as a yellow oil (58 mg, 82% yield); <sup>1</sup>H NMR (400 MHz, CDCl<sub>3</sub>) δ 7.95 – 7.86 (m, 2H), 7.63 – 7.57 (m, 1H), 7.50 – 7.44 (m, 2H), 3.07 (s, 3H), 2.91 (s, 3H). <sup>13</sup>C NMR (101 MHz, CDCl<sub>3</sub>) δ 191.7, 166.9, 134.6, 132.9, 129.5, 128.9, 36.9, 33.8. It is a known compound; the spectra data is in agreement with the reported one.<sup>5</sup>

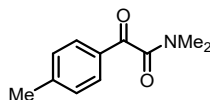

**3b**

*N,N*-Dimethyl-2-oxo-2-(*p*-tolyl)acetamide (**3b**) was isolated by column chromatography (PE/EA = 4:1) as a yellow oil (63 mg, 83% yield); <sup>1</sup>H NMR (400 MHz, CDCl<sub>3</sub>) δ 7.85 – 7.81 (m, 2H), 7.31 – 7.28 (m, 2H), 3.10 (s, 3H), 2.94 (s, 3H), 2.43 (s, 3H). <sup>13</sup>C NMR (101 MHz, CDCl<sub>3</sub>) δ 191.5, 167.2, 145.9, 130.7, 129.8, 37.0, 33.9, 21.9. It is a known compound; the spectra data is in agreement with the reported one.<sup>6</sup>

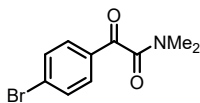

**3c**

2-(4-Bromophenyl)-*N,N*-dimethyl-2-oxoacetamide (**3c**) was isolated by column chromatography (PE/EA = 3:1) as a yellow solid (72 mg, 70% yield);  $^1\text{H}$  NMR (400 MHz,  $\text{CDCl}_3$ )  $\delta$  7.81 (d,  $J$  = 8.6 Hz, 2H), 7.64 (d,  $J$  = 8.6 Hz, 2H), 3.10 (s, 3H), 2.95 (s, 3H).  $^{13}\text{C}$  NMR (101 MHz,  $\text{CDCl}_3$ )  $\delta$  190.5, 166.4, 132.4, 131.9, 131.0, 130.1, 37.0, 34.1. It is a known compound; the spectra data is in agreement with the reported one.<sup>5</sup>

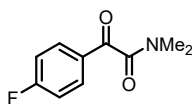

**3d**

2-(4-Fluorophenyl)-*N,N*-dimethyl-2-oxoacetamide (**3d**) was isolated by column chromatography (PE/EA = 3:1) as a yellow oil (58 mg, 74% yield);  $^1\text{H}$  NMR (400 MHz,  $\text{CDCl}_3$ )  $\delta$  8.10 – 7.90 (m, 2H), 7.17 (t,  $J$  = 8.6 Hz, 2H), 3.10 (s, 3H), 2.95 (s, 3H).  $^{13}\text{C}$  NMR (101 MHz,  $\text{CDCl}_3$ )  $\delta$  190.0, 167.5, 166.6, 165.8, 132.5, 132.4, 129.7, 116.4, 116.2, 37.0, 34.0. It is a known compound; the spectra data is in agreement with the reported one.<sup>5</sup>

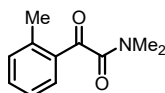

**3e**

*N,N*-Dimethyl-2-oxo-2-(*o*-tolyl)acetamide (**3e**) was isolated by column chromatography (PE/EA = 4:1) as a yellow oil (60 mg, 79% yield);  $^1\text{H}$  NMR (400 MHz,  $\text{CDCl}_3$ )  $\delta$  7.70 – 7.66 (m, 1H), 7.46 (dd,  $J$  = 7.5, 1.4 Hz, 1H), 7.30 (t,  $J$  = 7.4 Hz, 2H), 3.10 (s, 3H), 2.97 (s, 3H), 2.65 (s, 3H).  $^{13}\text{C}$  NMR (101 MHz,  $\text{CDCl}_3$ )  $\delta$  193.7, 167.8, 141.4, 133.6, 132.6, 132.5, 131.6, 126.1, 37.0, 34.0, 21.6. It is a known compound; the spectra data is in agreement with the reported one.<sup>6</sup>

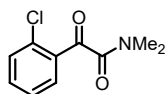

**3f**

2-(2-Chlorophenyl)-*N,N*-dimethyl-2-oxoacetamide (**3f**) was isolated by column chromatography (PE/EA = 3:1) as a yellow oil (63 mg, 75% yield);  $^1\text{H}$  NMR (400 MHz,  $\text{CDCl}_3$ )  $\delta$  7.70 (dd,  $J$  = 1.7, 0.8 Hz, 1H), 7.36 (dd,  $J$  = 3.7, 0.8 Hz, 1H), 6.59 (dd,  $J$  = 3.6, 1.7 Hz, 1H), 3.07 (s, 3H), 3.02 (s, 3H).  $^{13}\text{C}$  NMR (101 MHz,  $\text{CDCl}_3$ )  $\delta$  190.1, 166.9, 134.3, 133.7, 133.4, 132.2, 130.7, 127.2, 37.0, 34.5. It is a known compound; the spectra data is in agreement with the reported one.<sup>5</sup>

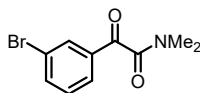

**3g**

2-(3-Bromophenyl)-*N,N*-dimethyl-2-oxoacetamide (**3g**) was isolated by column chromatography (PE/EA = 3:1) as a yellow solid (76 mg, 74% yield);  $^1\text{H}$  NMR (400 MHz,  $\text{CDCl}_3$ )  $\delta$  8.08 (t,  $J$  = 1.8 Hz, 1H), 7.87 (dt,  $J$  = 7.7, 1.4 Hz, 1H), 7.75 (m, 1H), 7.38 (t,  $J$  = 7.9 Hz, 1H), 3.11 (s, 3H), 2.96 (s, 3H).  $^{13}\text{C}$  NMR (101 MHz,  $\text{CDCl}_3$ )  $\delta$  190.1, 166.2, 137.5, 134.9, 132.4, 130.5, 128.3, 123.2, 37.0, 34.1. It is a known compound; the spectra data is in agreement with the reported one.<sup>5</sup>

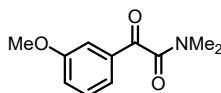

**3h**

2-(3-Methoxyphenyl)-*N,N*-dimethyl-2-oxoacetamide (**3h**) was isolated by column chromatography (PE/EA = 2:1) as a white solid (58 mg, 70% yield);  $^1\text{H}$  NMR (400 MHz,  $\text{CDCl}_3$ )  $\delta$  7.50 – 7.43 (m, 2H), 7.39 (t,  $J$  = 8.1 Hz, 1H), 7.16 (m, 1H), 3.84 (s, 3H), 3.09 (s, 3H), 2.93 (s, 3H).  $^{13}\text{C}$  NMR (101 MHz,  $\text{CDCl}_3$ )  $\delta$  191.6, 167.0, 160.1, 134.4, 130.0, 122.7, 121.5, 112.8, 55.5, 37.0, 33.9. It is a known compound; the spectra data is in agreement with the reported one.<sup>7</sup>

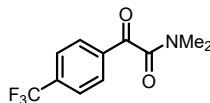

**3i**

*N,N*-Dimethyl-2-oxo-2-(4-(trifluoromethyl)phenyl)acetamide (**3i**) was isolated by column chromatography (PE/EA = 2:1) as a yellow oil (89 mg, 91% yield);  $^1\text{H}$  NMR (400 MHz,  $\text{CDCl}_3$ )  $\delta$  8.07 (d,  $J$  = 8.0 Hz, 2H), 7.79 – 7.71 (m, 2H), 3.13 (d,  $J$  = 2.2 Hz, 3H), 2.97 (d,  $J$  = 2.0 Hz, 3H).  $^{13}\text{C}$  NMR (101 MHz,  $\text{CDCl}_3$ )  $\delta$  190.3, 166.2, 136.1, 136.0, 135.9, 135.7, 130.1, 126.1, 126.1, 126.1, 126.1, 124.4, 37.1, 34.3. It is a known compound; the spectra data is in agreement with the reported one.<sup>6</sup>

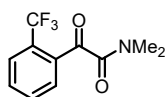

**3j**

*N,N*-Dimethyl-2-oxo-2-(4-(trifluoromethyl)phenyl)acetamide (**3j**) was isolated by column chromatography (PE/EA = 3:1) as a yellow oil (82 mg, 84% yield);  $^1\text{H}$  NMR (400 MHz,  $\text{CDCl}_3$ )  $\delta$  7.79 (m, 2H), 7.70 – 7.60 (m, 2H), 3.08 (d,  $J$  = 6.9 Hz, 6H).  $^{13}\text{C}$  NMR (101 MHz,  $\text{CDCl}_3$ )  $\delta$  190.4, 165.6, 134.4, 132.4, 131.9, 131.5, 127.3, 127.2, 127.1, 127.1, 124.7, 121.9, 37.0, 34.7. It is a known compound; the spectra data is in agreement with the reported one.<sup>6</sup>

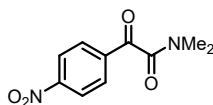

**3k**

*N,N*-Dimethyl-2-(4-nitrophenyl)-2-oxoacetamide (**3k**) was isolated by column chromatography (PE/EA = 2:1) as a yellow oil (80 mg, 90% yield);  $^1\text{H}$  NMR (400 MHz,  $\text{CDCl}_3$ )  $\delta$  8.34 (d,  $J$  = 8.8 Hz, 2H), 8.14 (d,  $J$  = 8.8 Hz, 2H), 3.15 (s, 3H), 3.00 (s, 3H).  $^{13}\text{C}$  NMR (101 MHz,  $\text{CDCl}_3$ )  $\delta$  189.2, 165.6, 151.1, 137.6, 130.8, 124.1, 77.2, 37.1, 34.3. It is a known compound; the spectra data is in agreement with the reported one.<sup>5</sup>

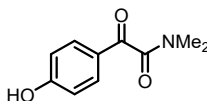

**3l**

2-(4-Hydroxyphenyl)-*N,N*-dimethyl-2-oxoacetamide (**3l**) was isolated by column chromatography (PE/EA = 1:2) as a yellow oil (39 mg, 51% yield);  $^1\text{H}$  NMR (400 MHz,  $\text{CDCl}_3$ )  $\delta$  9.86 (s, 1H), 7.81 (d,  $J$  = 8.6 Hz, 2H), 6.97 (d,  $J$  = 8.6 Hz, 2H).  $^{13}\text{C}$  NMR (101 MHz,  $\text{CDCl}_3$ )  $\delta$  191.3, 161.8, 132.6, 130.1, 116.2, 29.8, 1.2. HRMS (ESI) calcd. for  $\text{C}_{10}\text{H}_{12}\text{NO}_3^+$  [ $\text{M} + \text{H}^+$ ] 194.0739, found 194.0744.

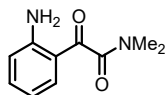

**3m**

2-(2-Aminophenyl)-*N,N*-dimethyl-2-oxoacetamide (**3m**) was isolated by column chromatography (PE/EA



= 1:3) as a brown oil (53 mg, 69% yield);  $^1\text{H}$  NMR (400 MHz,  $\text{CDCl}_3$ )  $\delta$  7.42 (dd,  $J$  = 8.1, 1.6 Hz, 1H), 7.30 (m, 1H), 6.71 – 6.61 (m, 2H), 3.10 (s, 3H), 2.95 (s, 3H).  $^{13}\text{C}$  NMR (101 MHz,  $\text{CDCl}_3$ )  $\delta$  194.3, 167.4, 151.7, 136.0, 133.3, 117.2, 116.4, 114.3, 37.2, 34.0, 1.1. It is a known compound; the spectra data is in agreement with the reported one.<sup>8</sup>

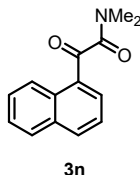

*N,N*-Dimethyl-2-(naphthalen-1-yl)-2-oxoacetamide (**3n**) was isolated by column chromatography (PE/EA = 3:1) as a yellow oil (74 mg, 81% yield);  $^1\text{H}$  NMR (400 MHz,  $\text{CDCl}_3$ )  $\delta$  9.29 – 9.22 (m, 1H), 8.11 (d,  $J$  = 8.2 Hz, 1H), 7.99 (dd,  $J$  = 7.2, 1.2 Hz, 1H), 7.94 – 7.90 (m, 1H), 7.76 – 7.68 (m, 1H), 7.62 – 7.58 (m, 1H), 7.54 (dd,  $J$  = 8.1, 7.2 Hz, 1H), 3.16 (s, 3H), 3.02 (s, 3H).  $^{13}\text{C}$  NMR (101 MHz,  $\text{CDCl}_3$ )  $\delta$  194.2, 167.6, 135.9, 134.3, 134.1, 131.0, 129.3, 128.7, 128.5, 127.0, 125.8, 124.5, 37.2, 34.1. It is a known compound; the spectra data is in agreement with the reported one.<sup>5</sup>

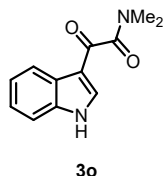

2-(1*H*-Indol-3-yl)-*N,N*-dimethyl-2-oxoacetamide (**3o**) was isolated by column chromatography (PE/EA = 1:1) as a yellow oil (66 mg, 76% yield);  $^1\text{H}$  NMR (400 MHz,  $\text{CDCl}_3$ )  $\delta$  10.28 – 10.12 (m, 1H), 8.30 (d,  $J$  = 7.8 Hz, 1H), 7.71 (d,  $J$  = 3.1 Hz, 1H), 7.33 (dd,  $J$  = 8.1, 1.1 Hz, 1H), 7.29 (td,  $J$  = 7.6, 1.1 Hz, 1H), 7.25 – 7.22 (m, 1H), 3.07 (s, 3H), 3.02 (s, 3H).  $^{13}\text{C}$  NMR (101 MHz,  $\text{CDCl}_3$ )  $\delta$  186.2, 168.2, 136.9, 135.9, 125.4, 124.3, 123.3, 122.0, 114.4, 112.3, 37.7, 34.6. It is a known compound; the spectra data is in agreement with the reported one.<sup>9</sup>

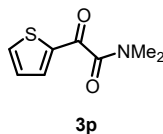

*N,N*-Dimethyl-2-oxo-2-(thiophen-2-yl)acetamide (**3p**) was isolated by column chromatography (PE/EA = 2:1) as a brown oil (66 mg, 86% yield);  $^1\text{H}$  NMR (400 MHz,  $\text{CDCl}_3$ )  $\delta$  7.81 (dd,  $J$  = 3.8, 1.2 Hz, 1H), 7.78

(dd,  $J = 4.9, 1.2$  Hz, 1H), 7.17 (dd,  $J = 4.9, 3.9$  Hz, 1H), 3.09 (s, 3H), 3.03 (s, 3H).  $^{13}\text{C}$  NMR (101 MHz,  $\text{CDCl}_3$ )  $\delta$  183.5, 165.8, 140.3, 136.4, 136.1, 128.6, 77.2, 37.3, 34.5. It is a known compound; the spectra data is in agreement with the reported one.<sup>6</sup>

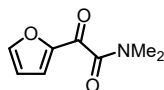

**3q**

2-(Furan-2-yl)-*N,N*-dimethyl-2-oxoacetamide (**3q**) was isolated by column chromatography (PE/EA = 1:1) as a yellow oil (52 mg, 78% yield);  $^1\text{H}$  NMR (400 MHz,  $\text{CDCl}_3$ )  $\delta$  7.70 (dd,  $J = 1.7, 0.8$  Hz, 1H), 7.36 (dd,  $J = 3.7, 0.8$  Hz, 1H), 6.59 (dd,  $J = 3.6, 1.7$  Hz, 1H), 3.07 (s, 3H), 3.02 (s, 3H).  $^{13}\text{C}$  NMR (101 MHz,  $\text{CDCl}_3$ )  $\delta$  178.5, 165.4, 150.2, 148.6, 122.2, 112.8, 37.2, 34.5. It is a known compound; the spectra data is in agreement with the reported one.<sup>5</sup>

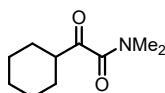

**3r**

2-Cyclohexyl-*N,N*-dimethyl-2-oxoacetamide (**3r**) was isolated by column chromatography (PE/EA = 6:1) as a yellow oil (49 mg, 67% yield);  $^1\text{H}$  NMR (400 MHz,  $\text{CDCl}_3$ )  $\delta$  2.93 (d,  $J = 12.7$  Hz, 7H), 1.93 – 1.84 (m, 2H), 1.80 – 1.70 (m, 2H), 1.68 – 1.60 (m, 1H), 1.32 – 1.12 (m, 5H).  $^{13}\text{C}$  NMR (101 MHz,  $\text{CDCl}_3$ )  $\delta$  203.8, 167.4, 46.7, 36.8, 34.2, 27.0, 25.7, 25.2. HRMS (ESI) calcd. for  $\text{C}_{10}\text{H}_{18}\text{NO}_2^+$  [ $\text{M} + \text{H}^+$ ] 184.1259, found 184.1257.

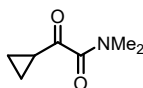

**3s**

2-Cyclopropyl-*N,N*-dimethyl-2-oxoacetamide (**3s**) was isolated by column chromatography (PE/EA = 6:1) as a yellow oil (49 mg, 67% yield);  $^1\text{H}$  NMR (400 MHz,  $\text{CDCl}_3$ )  $\delta$  3.00 (d,  $J = 1.8$  Hz, 6H), 2.35 (tt,  $J = 7.9, 4.6$  Hz, 1H), 1.25 – 1.21 (m, 2H), 1.13 – 1.08 (m, 2H).  $^{13}\text{C}$  NMR (101 MHz,  $\text{CDCl}_3$ )  $\delta$  200.9, 167.0, 37.1, 34.5, 19.5, 12.6. It is a known compound; the spectra data is in agreement with the reported one.<sup>10</sup>

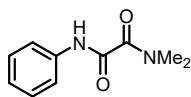

**5a**

*N,N*-Dimethyl-*N'*-phenyloxalamide (**5a**) was isolated by column chromatography (PE/EA = 1:1) as a yellow oil (48 mg, 63% yield);  $^1\text{H}$  NMR (400 MHz,  $\text{CDCl}_3$ )  $\delta$  9.24 (s, 1H), 7.60 (d,  $J$  = 8.0 Hz, 2H), 7.36 (t,  $J$  = 7.9 Hz, 2H), 7.16 (t,  $J$  = 7.4 Hz, 1H), 3.52 (s, 3H), 3.09 (s, 3H).  $^{13}\text{C}$  NMR (101 MHz,  $\text{CDCl}_3$ )  $\delta$  161.5, 158.4, 136.9, 129.1, 125.0, 119.8, 38.8, 37.9. It is a known compound; the spectra data is in agreement with the reported one.<sup>11</sup>

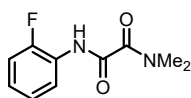

**5b**

*N*-(2-Fluorophenyl)-*N',N'*-dimethyloxalamide (**5b**) was isolated by column chromatography (PE/EA = 1:1) as a yellow oil (51 mg, 61% yield);  $^1\text{H}$  NMR (400 MHz,  $\text{CDCl}_3$ )  $\delta$  9.45 (s, 1H), 8.29 (td,  $J$  = 7.5, 1.4 Hz, 1H), 7.12 (m, 3H), 3.49 (s, 3H), 3.09 (s, 3H).  $^{13}\text{C}$  NMR (101 MHz,  $\text{CDCl}_3$ )  $\delta$  161.1, 158.5, 154.0, 151.6, 125.4, 125.3, 125.2, 124.5, 124.4, 121.3, 115.2, 115.0, 77.2, 38.7, 37.7. HRMS (ESI) calcd. for  $\text{C}_{10}\text{H}_{12}\text{FN}_2\text{O}_2^+$  [ $\text{M} + \text{H}^+$ ] 211.0805, found 211.0809.

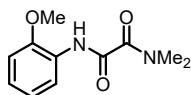

**5c**

*N*-(2-Methoxyphenyl)-*N',N'*-dimethyloxalamide (**5c**) was isolated by column chromatography (PE/EA = 2:1) as a yellow oil (56 mg, 63% yield);  $^1\text{H}$  NMR (400 MHz,  $\text{CDCl}_3$ )  $\delta$  9.66 (s, 1H), 8.33 (dd,  $J$  = 8.1, 1.6 Hz, 1H), 7.07 (td,  $J$  = 7.8, 1.6 Hz, 1H), 6.94 (td,  $J$  = 7.8, 1.3 Hz, 1H), 6.87 (dd,  $J$  = 8.1, 1.4 Hz, 1H), 3.85 (s, 3H), 3.45 (s, 3H), 3.05 (s, 3H).  $^{13}\text{C}$  NMR (101 MHz,  $\text{CDCl}_3$ )  $\delta$  161.9, 158.5, 148.7, 126.6, 124.8, 120.9, 119.6, 110.2, 55.7, 38.7, 37.5. HRMS (ESI) calcd. for  $\text{C}_{11}\text{H}_{15}\text{N}_2\text{O}_3^+$  [ $\text{M} + \text{H}^+$ ] 223.1004, found 223.1009.

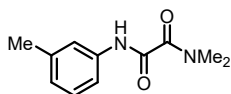

**5d**

*N,N*-Dimethyl-*N'*-(*m*-tolyl)oxalamide (**5d**) was isolated by column chromatography (PE/EA = 2:1) as a yellow oil (58 mg, 70% yield); <sup>1</sup>H NMR (400 MHz, CDCl<sub>3</sub>) δ 9.28 (s, 1H), 7.48 – 7.44 (m, 1H), 7.41 – 7.34 (m, 1H), 7.22 (t, *J* = 7.8 Hz, 1H), 6.96 (m, 1H), 3.48 (s, 3H), 3.07 (s, 3H), 2.34 (d, *J* = 0.8 Hz, 3H). <sup>13</sup>C NMR (101 MHz, CDCl<sub>3</sub>) δ 161.8, 158.6, 139.1, 136.9, 129.0, 125.9, 120.6, 117.1, 77.4, 38.9, 37.8, 21.6. HRMS (ESI) calcd. for C<sub>11</sub>H<sub>15</sub>N<sub>2</sub>O<sub>2</sub><sup>+</sup> [*M* + *H*<sup>+</sup>] 207.1055, found 207.1061.

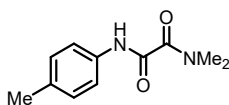

**5e**

*N,N*-Dimethyl-*N'*-(*p*-tolyl)oxalamide (**5e**) was isolated by column chromatography (PE/EA = 2:1) as a yellow oil (49 mg, 60% yield); <sup>1</sup>H NMR (400 MHz, CDCl<sub>3</sub>) δ 9.29 (s, 1H), 7.52 – 7.45 (m, 2H), 7.14 (d, *J* = 8.1 Hz, 2H), 3.48 (s, 3H), 3.06 (s, 3H), 2.32 (s, 3H). <sup>13</sup>C NMR (101 MHz, CDCl<sub>3</sub>) δ 161.8, 158.4, 134.6, 134.3, 129.5, 119.8, 38.7, 37.6, 20.9. It is a known compound; the spectra data is in agreement with the reported one.<sup>11</sup>

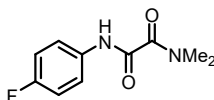

**5f**

*N*-(4-Fluorophenyl)-*N'*,*N'*-dimethyloxalamide (**5f**) was isolated by column chromatography (PE/EA = 1:1) as a brown oil (49 mg, 60% yield); <sup>1</sup>H NMR (400 MHz, CDCl<sub>3</sub>) δ 9.30 (s, 1H), 7.60 – 7.53 (m, 2H), 7.09 – 7.00 (m, 2H), 3.51 (s, 3H), 3.09 (s, 3H). <sup>13</sup>C NMR (101 MHz, CDCl<sub>3</sub>) δ 161.4, 160.9, 158.3, 132.9, 132.9, 121.6, 121.5, 115.9, 115.7, 77.2, 38.8, 37.9. HRMS (ESI) calcd. for C<sub>10</sub>H<sub>12</sub>FN<sub>2</sub>O<sub>2</sub><sup>+</sup> [*M* + *H*<sup>+</sup>] 211.0805, found 211.0810.

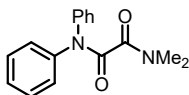

**5g**

*N,N*-Dimethyl-*N'*,*N'*-diphenyloxalamide (**5g**) was isolated by column chromatography (PE/EA = 2:1) as a yellow oil (81 mg, 76% yield); <sup>1</sup>H NMR (400 MHz, CDCl<sub>3</sub>) δ 7.36 (m, 6H), 7.32 – 7.22 (m, 4H), 3.09 (s, 3H), 2.74 (s, 3H). <sup>13</sup>C NMR (101 MHz, CDCl<sub>3</sub>) δ 129.5, 129.1, 128.4, 127.8, 126.8, 125.9, 37.2, 33.5. HRMS (ESI) calcd. for C<sub>16</sub>H<sub>17</sub>N<sub>2</sub>O<sub>2</sub><sup>+</sup> [*M* + *H*<sup>+</sup>] 269.1212, found 269.1213.

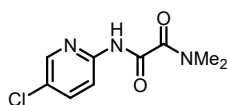

**5h**

*N*-(5-Chloropyridin-2-yl)-*N*',*N*'-dimethyloxalamide (**5h**) was isolated by column chromatography (PE/EA = 1:1) as a yellow oil (75 mg, 83% yield);  $^1\text{H}$  NMR (400 MHz,  $\text{CDCl}_3$ )  $\delta$  9.79 (s, 1H), 8.29 (d,  $J$  = 2.6 Hz, 1H), 8.17 (d,  $J$  = 8.9 Hz, 1H), 7.68 (dd,  $J$  = 8.8, 2.6 Hz, 1H), 3.44 (s, 3H), 3.07 (s, 3H).  $^{13}\text{C}$  NMR (101 MHz,  $\text{CDCl}_3$ )  $\delta$  161.0, 159.1, 148.8, 147.1, 138.0, 127.6, 114.6, 38.7, 37.7. HRMS (ESI) calcd. for  $\text{C}_9\text{H}_{11}\text{ClN}_3\text{O}_2^+$  [ $\text{M} + \text{H}^+$ ] 228.0462, found 228.0465.

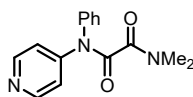

**5i**

*N,N*-Dimethyl-*N*'-phenyl-*N*'-(pyridin-4-yl)oxalamide (**5i**) was isolated by column chromatography (PE/EA = 1:2) as a yellow oil (77 mg, 72% yield);  $^1\text{H}$  NMR (400 MHz,  $\text{CDCl}_3$ )  $\delta$  8.55 (s, 2H), 7.51 – 7.42 (m, 3H), 7.30 (dt,  $J$  = 8.4, 2.8 Hz, 4H), 3.10 – 3.02 (m, 3H), 2.73 (s, 3H).  $^{13}\text{C}$  NMR (101 MHz,  $\text{CDCl}_3$ )  $\delta$  164.5, 163.1, 150.5, 148.3, 129.9, 37.2, 33.6. HRMS (ESI) calcd. for  $\text{C}_{15}\text{H}_{16}\text{N}_3\text{O}_2^+$  [ $\text{M} + \text{H}^+$ ] 270.1164, found 270.1168.

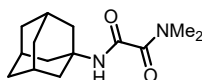

**5j**

*N*-((3*s*,5*s*,7*s*)-Adamantan-1-yl)-*N*',*N*'-dimethyloxalamide (**5j**) was isolated by column chromatography (PE/EA = 4:1) as a yellow oil (80 mg, 80% yield);  $^1\text{H}$  NMR (400 MHz,  $\text{CDCl}_3$ )  $\delta$  6.99 (s, 1H), 3.35 (d,  $J$  = 1.7 Hz, 3H), 2.96 (s, 3H), 2.10 – 2.04 (m, 3H), 2.00 (d,  $J$  = 3.1 Hz, 6H), 1.66 (t,  $J$  = 3.1 Hz, 6H).  $^{13}\text{C}$  NMR (101 MHz,  $\text{CDCl}_3$ )  $\delta$  162.7, 160.2, 52.0, 41.0, 38.5, 37.1, 36.2, 29.2. HRMS (ESI) calcd. for  $\text{C}_{14}\text{H}_{23}\text{N}_2\text{O}_2^+$  [ $\text{M} + \text{H}^+$ ] 251.1681, found 251.1683.

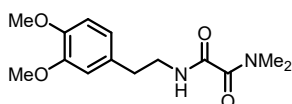

**5k**

*N*-(3,4-Dimethoxyphenethyl)-*N,N'*-dimethyloxalamide (**5k**) was isolated by column chromatography (PE/EA = 1:2) as a white oil (90 mg, 80% yield); <sup>1</sup>H NMR (400 MHz, CDCl<sub>3</sub>) δ 7.33 (s, 1H), 6.80 (d, *J* = 8.0 Hz, 1H), 6.77 – 6.70 (m, 2H), 3.86 (d, *J* = 11.3 Hz, 6H), 3.52 (q, *J* = 6.9 Hz, 2H), 3.37 (s, 3H), 2.99 (s, 3H), 2.79 (t, *J* = 7.1 Hz, 2H). <sup>13</sup>C NMR (101 MHz, CDCl<sub>3</sub>) δ 162.0, 161.1, 149.0, 147.7, 130.9, 120.6, 111.8, 111.4, 55.9, 55.8, 40.6, 38.3, 37.0, 35.0, 29.7. HRMS (ESI) calcd. for C<sub>14</sub>H<sub>21</sub>N<sub>2</sub>O<sub>4</sub><sup>+</sup> [*M* + *H*<sup>+</sup>] 281.1423, found 281.1413.

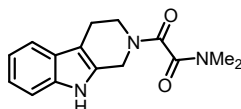

**5l**

*N,N*-Dimethyl-2-oxo-2-(1,3,4,9-tetrahydro-2*H*-pyrido[3,4-*b*]indol-2-yl)acetamide (**5l**) was isolated by column chromatography (PE/EA = 1:1) as a brown oil (93 mg, 86% yield); <sup>1</sup>H NMR (400 MHz, CDCl<sub>3</sub>) δ 8.26 (s, 1H), 7.68 (m, 1H), 7.50 – 7.42 (m, 2H), 7.33 (t, *J* = 7.6 Hz, 1H), 7.17 (t, *J* = 7.6 Hz, 1H), 7.11 (m, 1H), 4.85 (t, *J* = 1.5 Hz, 2H), 4.60 (q, *J* = 1.5 Hz, 1H), 3.99 – 3.95 (m, 1H), 3.79 – 3.73 (m, 2H), 3.06 (s, 3H), 3.03 (s, 3H), 3.02 (s, 1H), 2.96 (d, *J* = 1.0 Hz, 2H), 2.89 – 2.80 (m, 3H). <sup>13</sup>C NMR (101 MHz, CDCl<sub>3</sub>) δ 1164.8, 164.6, 162.6, 136.3, 132.1, 132.1, 132.0, 128.6, 128.5, 126.7, 122.2, 122.1, 119.8, 118.1, 118.0, 111.1, 107.9, 44.5, 44.1, 39.6, 39.5, 37.3, 36.5, 33.9, 33.8, 29.7, 22.0, 20.8. HRMS (ESI) calcd. for C<sub>15</sub>H<sub>18</sub>N<sub>3</sub>O<sub>2</sub><sup>+</sup> [*M* + *H*<sup>+</sup>] 272.1321, found 272.1333.

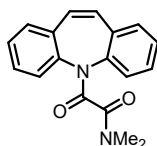

**5m**

*N,N*-Dimethyl-2-oxo-2-(1,3,4,9-tetrahydro-2*H*-pyrido[3,4-*b*]indol-2-yl)acetamide (**5m**) was isolated by column chromatography (PE/EA = 2:1) as a yellow oil (85 mg, 73% yield); <sup>1</sup>H NMR (400 MHz, CDCl<sub>3</sub>) δ 7.61 – 7.56 (m, 1H), 7.53 – 7.47 (m, 2H), 7.43 – 7.32 (m, 5H), 7.01 – 6.91 (m, 2H), 2.81 (s, 3H), 2.65 (s, 3H). <sup>13</sup>C NMR (101 MHz, CDCl<sub>3</sub>) δ 165.4, 163.9, 137.9, 137.6, 134.8, 133.5, 131.2, 129.7, 129.7, 129.6, 129.4, 129.0, 128.5, 128.2, 128.1, 37.2, 33.3. HRMS (ESI) calcd. for C<sub>18</sub>H<sub>17</sub>N<sub>2</sub>O<sub>2</sub><sup>+</sup> [*M* + *H*<sup>+</sup>] 293.1212, found 293.1243.

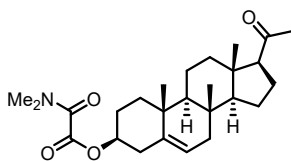

**5n**

(3*S*,8*S*,9*S*,10*R*,13*S*,14*S*,17*S*)-17-Acetyl-8,10,13-trimethyl-2,3,4,7,8,9,10,11,12,13,14,15,16,17-tetradecahydro-1*H*-cyclopenta[*a*]phenanthren-3-yl 2-(dimethylamino)-2-oxoacetate (**5n**) was isolated by column chromatography (PE/EA = 2:1) as a yellow oil (111 mg, 65% yield); <sup>1</sup>H NMR (400 MHz, CDCl<sub>3</sub>) δ 5.44 – 5.40 (m, 1H), 4.86 – 4.76 (m, 1H), 3.02 (s, 3H), 2.98 (d, *J* = 1.6 Hz, 3H), 2.54 (t, *J* = 9.0 Hz, 1H), 2.47 – 2.41 (m, 2H), 2.22 – 2.15 (m, 1H), 2.13 (d, *J* = 1.6 Hz, 3H), 2.08 – 1.96 (m, 3H), 1.92 (dd, *J* = 13.5, 3.6 Hz, 1H), 1.76 – 1.65 (m, 3H), 1.62 (td, *J* = 11.5, 10.4, 5.5 Hz, 2H), 1.53 – 1.44 (m, 3H), 1.28 – 1.20 (m, 2H), 1.20 – 1.13 (m, 2H), 1.03 (s, 3H), 0.64 (s, 3H). <sup>13</sup>C NMR (101 MHz, CDCl<sub>3</sub>) δ 209.4, 139.0, 123.0, 75.9, 63.6, 56.8, 49.8, 43.9, 38.7, 37.7, 37.0, 36.9, 36.6, 34.0, 31.8, 31.7, 31.5, 27.4, 24.4, 22.8, 21.0, 19.2, 13.2. HRMS (ESI) calcd. for C<sub>26</sub>H<sub>40</sub>NO<sub>4</sub><sup>+</sup> [*M* + *H*<sup>+</sup>] 430.2879, found 430.2885.

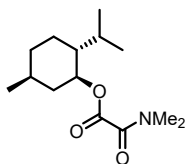

**5o**

(1*S*,2*R*,5*S*)-2-Isopropyl-5-methylcyclohexyl 2-(dimethylamino)-2-oxoacetate (**5o**) was isolated by column chromatography (PE/EA = 4:1) as a yellow oil (93 mg, 91% yield); <sup>1</sup>H NMR (400 MHz, CDCl<sub>3</sub>) δ 4.84 (td, *J* = 10.9, 4.4 Hz, 1H), 2.96 (d, *J* = 11.1 Hz, 6H), 2.06 (dd, *J* = 11.5, 4.2 Hz, 1H), 1.93 (m, 1H), 1.74 – 1.64 (m, 2H), 1.55 – 1.41 (m, 2H), 1.15 – 1.00 (m, 2H), 0.89 (dd, *J* = 10.1, 6.8 Hz, 7H), 0.76 (d, *J* = 6.9 Hz, 3H). <sup>13</sup>C NMR (101 MHz, CDCl<sub>3</sub>) δ 162.9, 162.0, 76.3, 46.7, 40.3, 36.9, 33.9, 33.8, 31.4, 25.9, 23.1, 21.8, 20.6, 15.9. HRMS (ESI) calcd. for C<sub>14</sub>H<sub>26</sub>NO<sub>3</sub><sup>+</sup> [*M* + *H*<sup>+</sup>] 256.1834, found 256.1701.

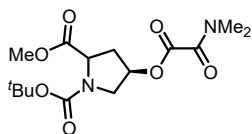

**5p**

1-(*tert*-Butyl) 2-methyl (4*R*)-4-(2-(dimethylamino)-2-oxoacetoxy)pyrrolidine-1,2-dicarboxylate (**5p**) was isolated by column chromatography (PE/EA = 2:1) as a yellow oil (116 mg, 84% yield); <sup>1</sup>H NMR (400 MHz, CDCl<sub>3</sub>) δ 5.43 (dd, *J* = 5.7, 2.9 Hz, 1H), 4.41 (dt, *J* = 34.2, 7.9 Hz, 1H), 3.78 – 3.65 (m, 5H), 2.97 (d, *J* = 5.6 Hz, 6H), 2.55 – 2.40 (m, 1H), 2.26 (m, 1H), 1.41 (d, *J* = 23.6 Hz, 9H). <sup>13</sup>C NMR (101 MHz,

$\text{CDCl}_3$ )  $\delta$  172.8, 172.6, 162.3, 162.2, 160.9, 80.7, 74.5, 73.7, 57.6, 57.3, 52.4, 52.2, 51.8, 51.7, 37.0, 36.9, 36.3, 35.3, 34.1, 29.6, 28.3, 28.2, 28.1. HRMS (ESI) calcd. for  $\text{C}_{15}\text{H}_{25}\text{N}_2\text{O}_7^+$   $[\text{M} + \text{H}^+]$  345.1584, found 345.1576.



## IV. General Procedure for Amination in One Pot

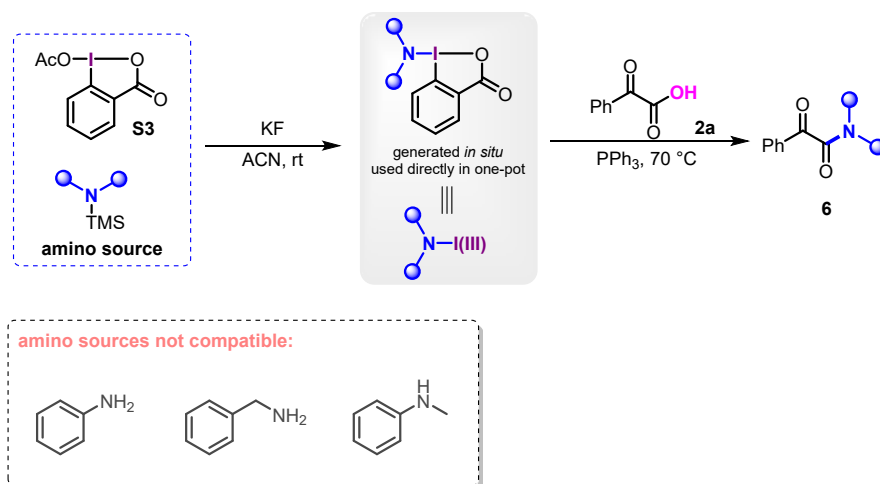

**Scheme S1.** Introduction of diverse amino functional groups in one-pot protocol.

To a 50 mL two-necked round-bottomed flask equipped with a stirrer bar were added compound **S3** (100 mg, 0.33 mmol, 1.00 equiv), KF (1.9 mg, 0.033 mmol, 0.1 equiv) and ACN (5 mL) under  $N_2$  atmosphere, followed by the careful addition of amino source (0.49 mmol, 1.5 equiv). The reaction mixture was stirred at room temperature for 3 h in the dark. Then benzoylformic acid (0.3 mmol) and  $PPh_3$  (94 mg, 0.36 mmol, 1.2 equiv) were added to the reaction mixture. The reaction flask was placed in an oil bath and heated up to 70 °C. After substrate was fully consumed, the reaction was quenched with  $H_2O$  (10 mL) and extracted with EA (15 mL x 3). The combined organic layer was washed with brine, dried over anhydrous  $Na_2SO_4$ , and concentrated in vacuo to afford the crude product, which was then purified by silica gel flash chromatography to give the corresponding products.

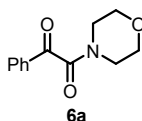

1-Morpholino-2-phenylethane-1,2-dione (**6a**) was isolated by column chromatography (PE/EA = 4:1) as a colorless oil (56 mg, 85% yield);  $^1H$  NMR (400 MHz,  $CDCl_3$ )  $\delta$  7.98 – 7.90 (m, 2H), 7.64 (td,  $J$  = 7.5, 1.4 Hz, 1H), 7.54 – 7.48 (m, 2H), 3.82 – 3.74 (m, 4H), 3.67 – 3.58 (m, 2H), 3.40 – 3.33 (m, 2H).  $^{13}C$  NMR (101 MHz,  $CDCl_3$ )  $\delta$  191.2, 165.5, 135.0, 133.1, 129.7, 129.2, 66.8, 66.8, 46.3, 41.7. It is a known compound; the spectra data is in agreement with the reported one.<sup>12</sup>

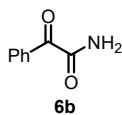

2-Oxo-2-phenylacetamide (**6b**) was isolated by column chromatography (PE/EA = 2:1) as a yellow oil (27 mg, 61% yield);  $^1\text{H}$  NMR (400 MHz,  $\text{CDCl}_3$ )  $\delta$  8.31 (dd,  $J$  = 8.4, 1.4 Hz, 2H), 7.67 – 7.61 (m, 1H), 7.49 (dd,  $J$  = 8.5, 7.2 Hz, 2H), 6.96 (s, 1H), 5.82 (s, 1H). It is a known compound; the spectra data is in agreement with the reported one.<sup>13</sup>

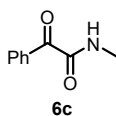

*N*-Methyl-2-oxo-2-phenylacetamide (**6c**) was isolated by column chromatography (PE/EA = 3:1) as a yellow oil (32 mg, 72% yield);  $^1\text{H}$  NMR (600 MHz,  $\text{CDCl}_3$ )  $\delta$  8.33 (d,  $J$  = 7.8 Hz, 2H), 7.61 (t,  $J$  = 7.5 Hz, 1H), 7.47 (t,  $J$  = 7.6 Hz, 2H), 7.12 (s, 1H), 2.97 (d,  $J$  = 5.1 Hz, 3H). It is a known compound; the spectra data is in agreement with the reported one.<sup>14</sup>

## V. Mechanistic Studies

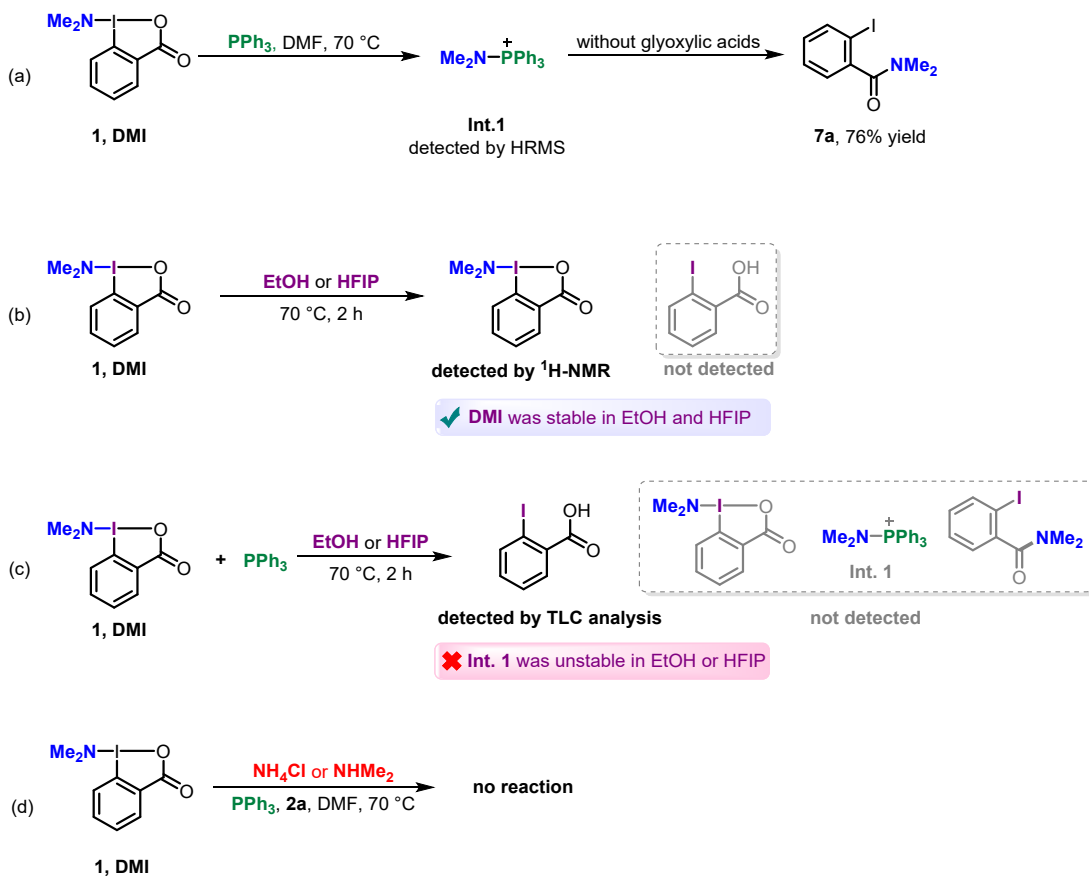

**Scheme S2.** Control experiments

**DMI** (140 mg, 0.48 mmol, 1.2 equiv) and  $\text{PPh}_3$  (126 mg, 0.48 mmol, 1.2 equiv) were placed in a 10 ml two-neck rounded bottom flask, and DMF (2.0 mL) was added. The reaction flask was placed in an oil bath and heated up to  $70^\circ\text{C}$ . After 10 mins, Int.1 was detected by LC-MS analysis and when substrate was fully consumed, the reaction was quenched with  $\text{H}_2\text{O}$  (10 mL) and extracted with EA (20 mL x 3). The combined organic layer was washed with brine, dried over anhydrous  $\text{Na}_2\text{SO}_4$ , and concentrated in vacuo to afford the crude product, which was then purified by silica gel flash chromatography to give product **7a** with 76% yield.  $^1\text{H NMR}$  (400 MHz,  $\text{CDCl}_3$ )  $\delta$  7.81 (dd,  $J = 8.0, 1.1$  Hz, 1H), 7.38 (td,  $J = 7.6, 1.2$  Hz, 1H), 7.21 (dd,  $J = 7.6, 1.7$  Hz, 1H), 7.06 (td,  $J = 7.7, 1.7$  Hz, 1H), 3.13 (s, 3H), 2.84 (s, 3H). It is a known compound; the spectra data is in agreement with the reported one.<sup>15</sup>

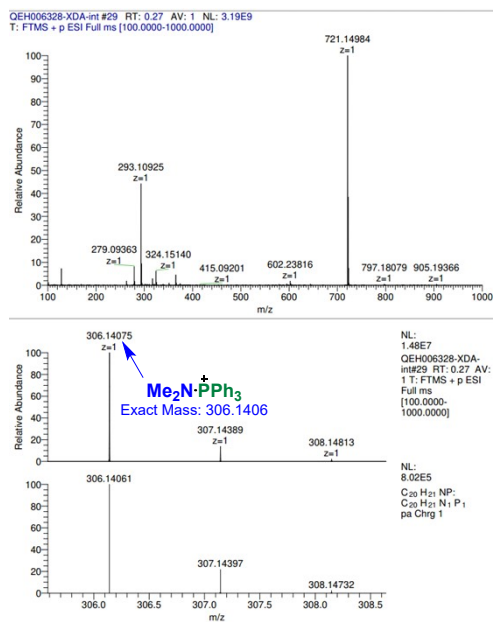

**Figure S1** Analysis of reaction by HRMS.

## VI. X-Ray Diffraction Data of DMI

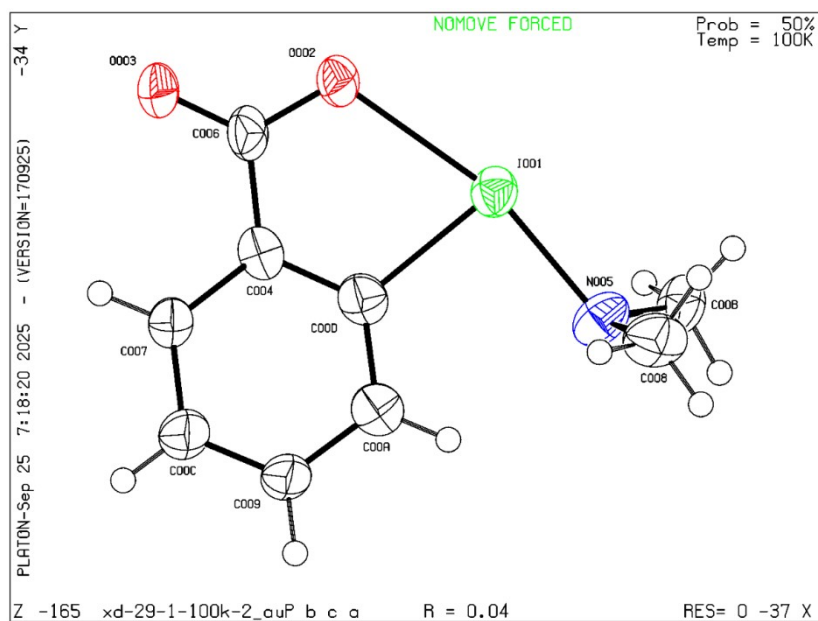

**Figure 2 X-ray crystal structure of DMI with 40% ellipsoid probability**

**Table 1 Crystal data and structure refinement for DMI.**

|                                  |                   |
|----------------------------------|-------------------|
| Identification code              | <b>DMI</b>        |
| Empirical formula                | $C_{11}H_{10}NOI$ |
| Formula weight                   | 172.20            |
| Temperature/K                    | 99.98(10)         |
| Crystal system                   | orthorhombic      |
| Space group                      | Pbca              |
| a/Å                              | 7.9000(8)         |
| b/Å                              | 15.6486(13)       |
| c/Å                              | 15.661(2)         |
| $\alpha/^\circ$                  | 90                |
| $\beta/^\circ$                   | 90                |
| $\gamma/^\circ$                  | 90                |
| Volume/Å <sup>3</sup>            | 1936.0(4)         |
| Z                                | 8                 |
| $\rho_{\text{calc}}/\text{cm}^3$ | 1.182             |
| $\mu/\text{mm}^{-1}$             | 0.608             |
| F(000)                           | 728.0             |

|                                             |                                                              |
|---------------------------------------------|--------------------------------------------------------------|
| Crystal size/mm <sup>3</sup>                | 0.1 × 0.04 × 0.02                                            |
| Radiation                                   | Cu Kα (λ = 1.54184)                                          |
| 2θ range for data collection/°              | 11.3 to 88.512                                               |
| Index ranges                                | -3 ≤ h ≤ 7, -14 ≤ k ≤ 14, -13 ≤ l ≤ 9                        |
| Reflections collected                       | 1697                                                         |
| Independent reflections                     | 666 [R <sub>int</sub> = 0.0552, R <sub>sigma</sub> = 0.0705] |
| Data/restraints/parameters                  | 666/194/121                                                  |
| Goodness-of-fit on F <sup>2</sup>           | 1.037                                                        |
| Final R indexes [I>=2σ (I)]                 | R <sub>1</sub> = 0.0378, wR <sub>2</sub> = 0.0713            |
| Final R indexes [all data]                  | R <sub>1</sub> = 0.0636, wR <sub>2</sub> = 0.0789            |
| Largest diff. peak/hole / e Å <sup>-3</sup> | 0.55/-0.44                                                   |

**Table 2 Fractional Atomic Coordinates (×10<sup>4</sup>) and Equivalent Isotropic Displacement Parameters (Å<sup>2</sup>×10<sup>3</sup>) for 2491335. U<sub>eq</sub> is defined as 1/3 of the trace of the orthogonalised U<sub>ij</sub> tensor.**

| Atom | x          | y         | z         | U(eq)   |
|------|------------|-----------|-----------|---------|
| I001 | 4077.3(12) | 3101.3(5) | 4308.0(6) | 37.7(4) |
| O002 | 6396(10)   | 3168(6)   | 5262(6)   | 37(2)   |
| O003 | 8526(12)   | 4018(5)   | 5653(7)   | 45(3)   |
| C004 | 6792(18)   | 4415(8)   | 4471(10)  | 29(3)   |
| N005 | 2386(15)   | 3302(7)   | 3328(8)   | 45(4)   |
| C006 | 7310(20)   | 3849(10)  | 5193(11)  | 40(4)   |
| C007 | 7731(18)   | 5150(8)   | 4254(10)  | 33(3)   |
| C008 | 710(20)    | 3611(9)   | 3652(10)  | 54(5)   |
| C009 | 5840(20)   | 5461(8)   | 3108(10)  | 41(4)   |
| C00A | 4880(19)   | 4731(9)   | 3310(10)  | 39(4)   |
| C00B | 2185(19)   | 2542(9)   | 2786(9)   | 46(4)   |
| C00C | 7270(20)   | 5656(9)   | 3557(10)  | 43(4)   |
| C00D | 5397(19)   | 4217(9)   | 3974(11)  | 40(4)   |

**Table 3 Anisotropic Displacement Parameters (Å<sup>2</sup>×10<sup>3</sup>) for 2491335. The Anisotropic displacement factor exponent takes the form: -2π<sup>2</sup>[h<sup>2</sup>a<sup>2</sup>U<sub>11</sub>+2hka\*b\*U<sub>12</sub>+...].**

| Atom | U <sub>11</sub> | U <sub>22</sub> | U <sub>33</sub> | U <sub>23</sub> | U <sub>13</sub> | U <sub>12</sub> |
|------|-----------------|-----------------|-----------------|-----------------|-----------------|-----------------|
| I001 | 38.9(7)         | 41.8(6)         | 32.4(7)         | -3.9(6)         | -0.6(8)         | -4.0(6)         |
| O002 | 25(6)           | 45(5)           | 41(6)           | 3(5)            | 5(5)            | -7(4)           |
| O003 | 31(7)           | 53(6)           | 52(7)           | 6(6)            | -4(6)           | -14(5)          |

**Table 3 Anisotropic Displacement Parameters ( $\text{\AA}^2 \times 10^3$ ) for 2491335. The Anisotropic displacement factor exponent takes the form:  $-2\pi^2[h^2a^{*2}U_{11}+2hka^*b^*U_{12}+\dots]$ .**

| Atom | $U_{11}$ | $U_{22}$ | $U_{33}$ | $U_{23}$ | $U_{13}$ | $U_{12}$ |
|------|----------|----------|----------|----------|----------|----------|
| C004 | 33(8)    | 24(6)    | 32(8)    | -16(6)   | 11(6)    | 4(5)     |
| N005 | 46(7)    | 50(9)    | 38(9)    | -9(6)    | -7(6)    | 12(5)    |
| C006 | 23(9)    | 45(8)    | 52(9)    | 1(7)     | 2(7)     | -7(6)    |
| C007 | 26(8)    | 28(7)    | 45(9)    | -7(6)    | 0(8)     | 7(5)     |
| C008 | 45(9)    | 52(9)    | 64(14)   | 8(9)     | 5(8)     | 17(9)    |
| C009 | 42(9)    | 29(7)    | 53(11)   | 2(7)     | -11(8)   | 7(7)     |
| C00A | 35(9)    | 35(8)    | 47(10)   | -4(6)    | 7(7)     | 8(6)     |
| C00B | 45(11)   | 57(9)    | 35(10)   | -10(8)   | -2(8)    | -7(8)    |
| C00C | 38(10)   | 34(8)    | 57(10)   | 0(7)     | -8(8)    | 8(7)     |
| C00D | 36(9)    | 31(8)    | 52(10)   | -2(6)    | 2(6)     | 5(6)     |

**Table 4 Bond Lengths for DMI.**

| Atom | Atom | Length/\AA | Atom | Atom | Length/\AA |
|------|------|------------|------|------|------------|
| I001 | O002 | 2.366(9)   | C004 | C00D | 1.385(18)  |
| I001 | N005 | 2.059(12)  | N005 | C008 | 1.495(18)  |
| I001 | C00D | 2.100(14)  | N005 | C00B | 1.470(15)  |
| O002 | C006 | 1.294(16)  | C007 | C00C | 1.397(17)  |
| O003 | C006 | 1.227(16)  | C009 | C00A | 1.408(18)  |
| C004 | C006 | 1.50(2)    | C009 | C00C | 1.362(19)  |
| C004 | C007 | 1.410(18)  | C00A | C00D | 1.376(18)  |

**Table 5 Bond Angles for DMI.**

| Atom | Atom | Atom | Angle/°   | Atom | Atom | Atom | Angle/°   |
|------|------|------|-----------|------|------|------|-----------|
| N005 | I001 | O002 | 165.1(4)  | O002 | C006 | C004 | 113.3(15) |
| N005 | I001 | C00D | 90.5(6)   | O003 | C006 | O002 | 124.5(15) |
| C00D | I001 | O002 | 74.7(5)   | O003 | C006 | C004 | 122.1(15) |
| C006 | O002 | I001 | 114.7(10) | C00C | C007 | C004 | 120.8(15) |
| C007 | C004 | C006 | 121.3(15) | C00C | C009 | C00A | 120.8(15) |
| C00D | C004 | C006 | 120.8(14) | C00D | C00A | C009 | 118.9(15) |
| C00D | C004 | C007 | 117.8(15) | C009 | C00C | C007 | 119.5(15) |
| C008 | N005 | I001 | 111.7(9)  | C004 | C00D | I001 | 116.2(12) |
| C00B | N005 | I001 | 112.2(8)  | C00A | C00D | I001 | 121.8(12) |

C00B N005 C008 111.2(12)

C00A C00D C004 122.0(14)

**Table 6 Hydrogen Atom Coordinates ( $\text{\AA} \times 10^4$ ) and Isotropic Displacement Parameters ( $\text{\AA}^2 \times 10^3$ ) for 2491335.**

| Atom | x       | y       | z       | U(eq) |
|------|---------|---------|---------|-------|
| H007 | 8691.8  | 5302.25 | 4585.34 | 40    |
| H00A | 194.72  | 3167.18 | 4007.23 | 81    |
| H00B | -28.79  | 3740.02 | 3168.25 | 81    |
| H00C | 882.69  | 4128.97 | 3993.95 | 81    |
| H009 | 5491.97 | 5822.45 | 2653.52 | 50    |
| H00D | 3890.31 | 4595.17 | 2992.44 | 47    |
| H00E | 3302.57 | 2315.55 | 2636.35 | 68    |
| H00F | 1576.28 | 2698.96 | 2263.36 | 68    |
| H00G | 1541.31 | 2105.96 | 3095.72 | 68    |
| H00H | 7941.51 | 6132.71 | 3397.51 | 51    |

**Table 7 Atomic Occupancy for 2491335.**

Atom Occupancy

N005 1.01(3)



## VII. Reference

- (1) Yang Z.; Du F.-H.; Zhang C.; Du Y. Accessing aryl azides *via* copper powder-catalyzed cross-coupling of arylboronic acids with the hypervalent azido-iodine reagent. *Org. Chem. Front.* **2023**, *10*, 4131-4138.
- (2) Bogonda G.; Kim H. Y.; Oh K. Direct Acyl Radical Addition to 2*H*-Indazoles Using Ag-Catalyzed Decarboxylative Cross-Coupling of  $\alpha$ -Keto Acids. *Org. Lett.* **2018**, *20*, 2711-2715.
- (3) Wang F.; Feng H.; Li H.; Miao T.; Cao T.; Zhang M. 1D Fe<sub>3</sub>O<sub>4</sub>@CuSiO<sub>3</sub> composites catalyzed decarboxylative A<sup>3</sup>-coupling for propargylamine synthesis. *Chin. Chem. Lett.* **2020**, *31*, 1558-1563.
- (4) Dai Y.; Niu W.; Huang J.; Sun J.; Xu X. Photo-induced amidation/Smiles rearrangement of alkenes for synthesizing quaternary-carbon-containing succinyldiamides. *Org. Biomol. Chem.* **2025**, *23*, 1330-1337.
- (5) Li D.; Wang M.; Liu J.; Zhao Q.; Wang L. Cu(ii)-catalyzed decarboxylative acylation of acyl C–H of formamides with  $\alpha$ -oxocarboxylic acids leading to  $\alpha$ -ketoamides. *Chem. Commun.* **2013**, *49*, 3640-3642.
- (6) Wang Y.; Meng X.; Cai C.; Wang L.; Gong H. Radical Cross-Coupling Reaction Based on Hydrogen Atom Abstraction of DMF and Decarboxylation of  $\alpha$ -Ketoacid under Electricity. *J. Org. Chem.* **2022**, *87*, 15042-15049.
- (7) Yang D.-N.; Du Y.-N.; Wang P.; Han M.-Y. Brook-Oxidation Reaction of Acylsilanes: General Access to  $\alpha$ -Ketoamides and  $\alpha$ -Ketothioamides. *Org. Lett.* **2024**, *26*, 10020-10024.
- (8) Choudhary S.; Mandal A.; Patra A.; Kant R.; Ghosh N. Copper/Zinc-Catalyzed Stitching of 2-Carbonylanilines with Bis(ynamides): Access to Pyrrolo 2,3-*b* quinolines and Its Photophysical Studies. *J. Org. Chem.* **2024**, *89*, 6274-6280.
- (9) Pérez E. G.; Cassels B. K.; Eibl C.; Gündisch D. Synthesis and evaluation of *N*1-alkylindole-3-ylalkylammonium compounds as nicotinic acetylcholine receptor ligands. *Bioorg. Med. Chem.* **2012**, *20*, 3719-3727.
- (10) Sarkar S.; Pal S.; Mukherjee A.; Santra S.; Zyryanov G. V.; Majee A. Visible-Light-Promoted Metal- and Photocatalyst-Free Reactions between Arylglyoxylic Acids and Tetraalkylthiuram Disulfides: Synthesis of  $\alpha$ -Ketoamides. *J. Org. Chem.* **2024**, *89*, 1473-1482.
- (11) Jayaram A.; Seenivasan V. T.; Govindan K.; Liu Y.-M.; Chen N.-Q.; Yeh T.-W.; Venkatachalam G.; Li C.-H.; Leung T.-F.; Lin W.-Y. Base-promoted triple cleavage of CCl<sub>2</sub>Br: a direct one-pot synthesis of unsymmetrical oxalamide derivatives. *Chem. Commun.* **2024**, *60*, 3079-3082.
- (12) Liu C.; Yang Z.; Guo S.; Zeng Y.; Zhu N.; Li X.; Fang Z.; Guo K. Copper–TEMPO-catalyzed synthesis of  $\alpha$ -ketoamides via tandem sp<sup>3</sup>C–H aerobic oxidation and amination of phenethyl alcohol derivatives. *Org. Biomol. Chem.* **2016**, *14*, 8570-8575.
- (13) Wang H.; Zhao Y.; Zheng Y.; Fang S.; Li J.; Wan X. Oxidative Coupling of Diazo and NH<sub>4</sub>I: A Route to Primary Oxamates and  $\alpha$ -Ketoamides. *J. Org. Chem.* **2020**, *85*, 3050-3058.
- (14) Gu G.; Yang T.; Yu O.; Qan H.; Wang J.; Wen J.; Dang L.; Zhang X. Enantioselective Iridium-Catalyzed Hydrogenation of  $\alpha$ -Keto Amides to  $\alpha$ -Hydroxy Amides. *Org. Lett.* **2017**, *19*, 5920-5923.
- (15) Sanz-Marco A.; Saavedra B.; Erbing E.; Malmberg J.; Johansson M. J.; Martin-Matute B. Selective C-H Iodination of Weinreb Amides and Benzamides through Iridium Catalysis in Solution and under

Mechanochemical Conditions. *Org. Lett.* **2023**, 26, 2800-2805.

# V. NMR Spectra of Starting Materials and Products

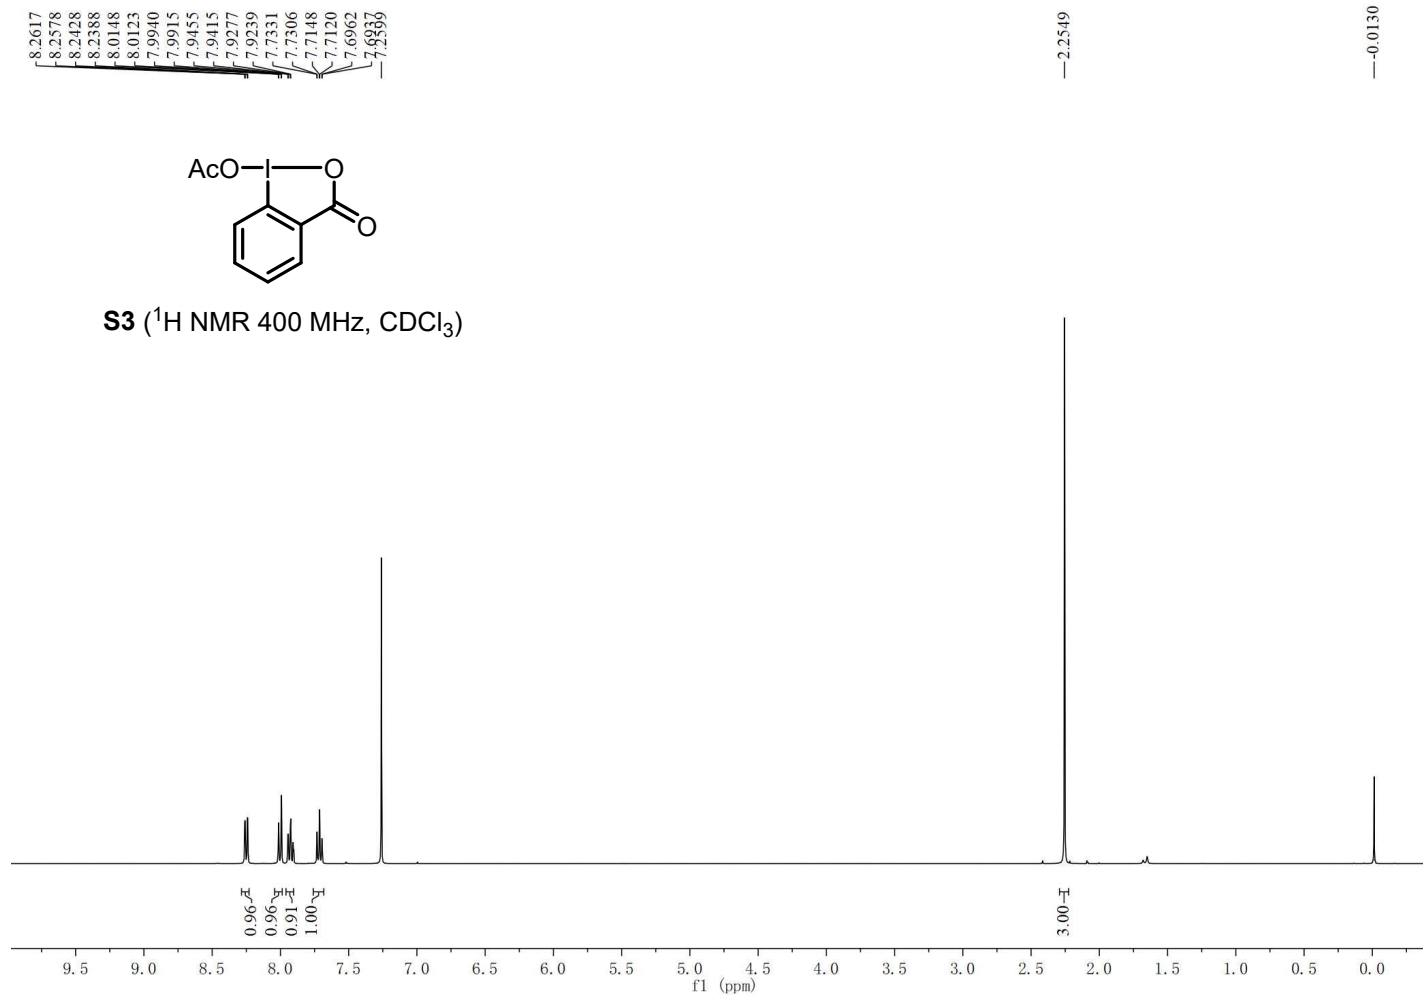

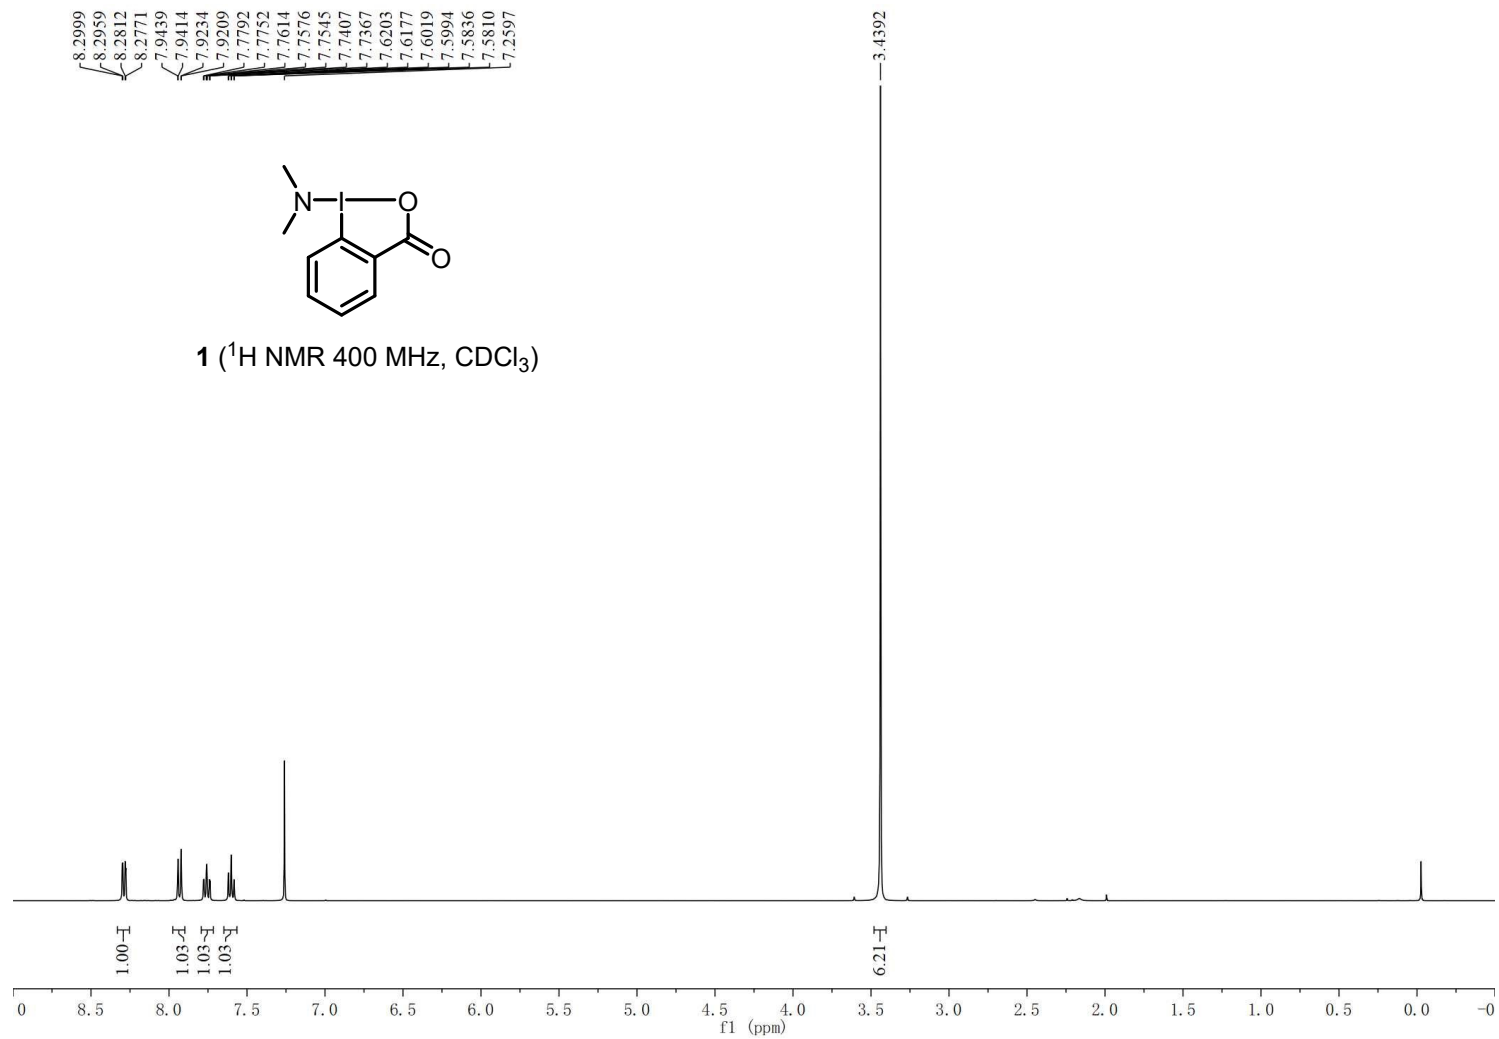

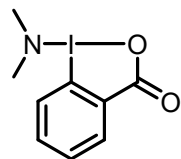

**1** ( $^{13}\text{C}$  NMR 101 MHz,  $\text{CDCl}_3$ )

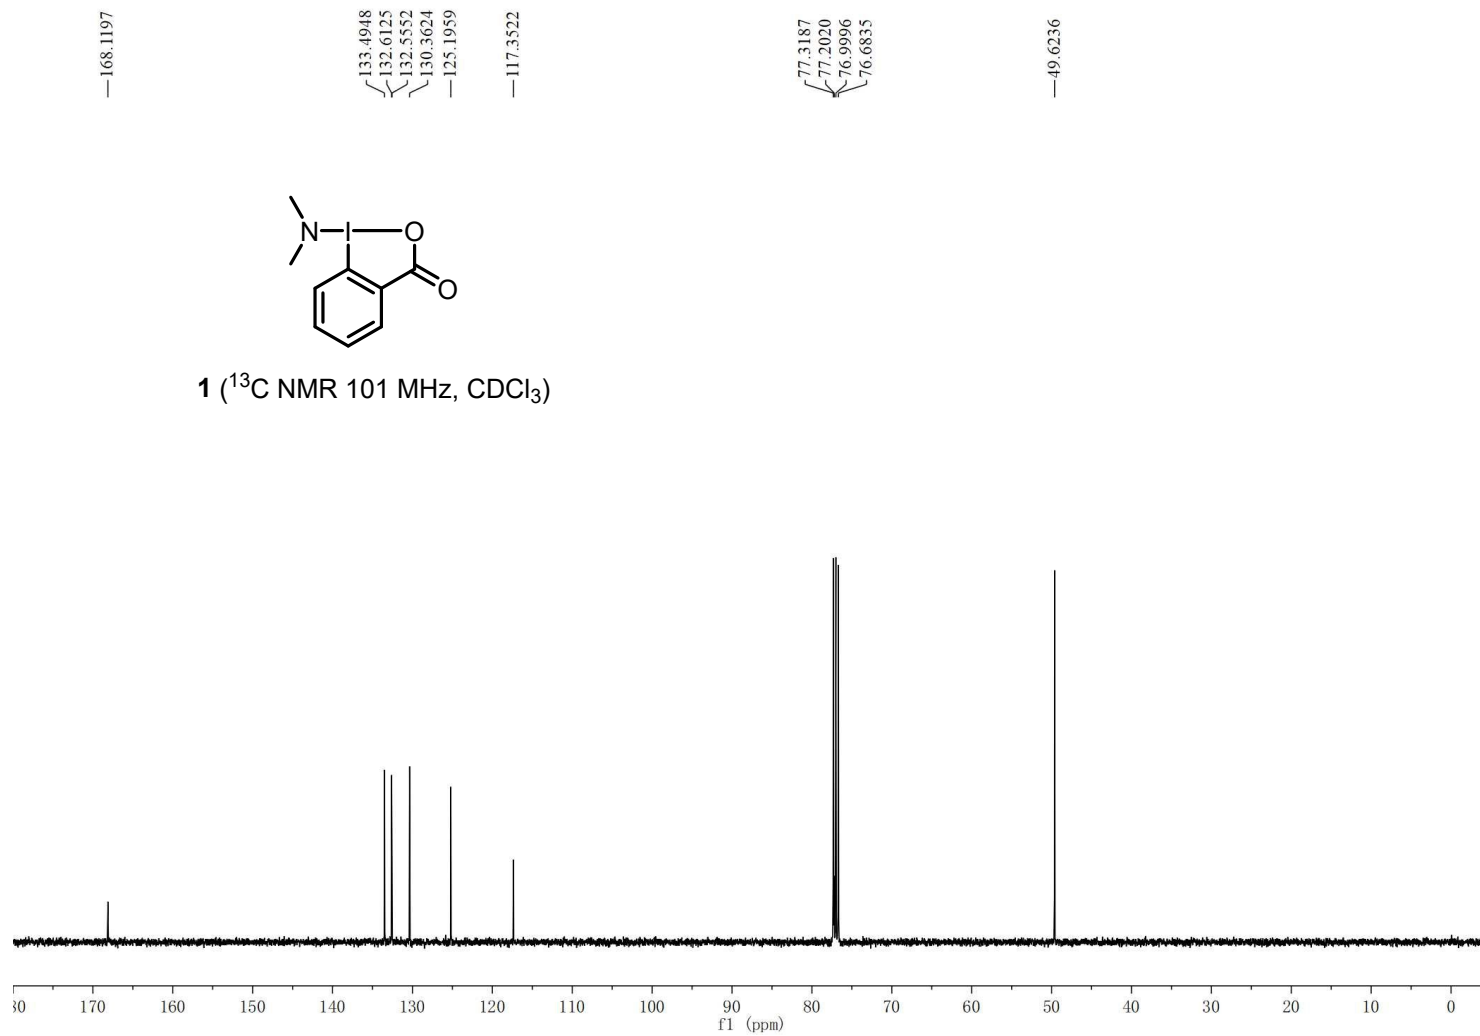

7.5443  
7.5250  
7.5155  
7.5116  
7.5081  
7.4926  
7.4157  
7.4119  
7.4090  
7.4053  
7.3620  
7.3584  
7.3551  
7.3518  
7.3425  
7.3389  
7.3355

3.8333

2.5094  
2.5048  
2.5002  
2.4955  
2.4908

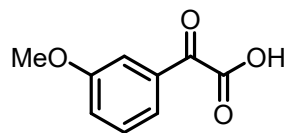

**2h** ( $^1\text{H}$  NMR 400 MHz,  $\text{DMSO-}d_6$ )

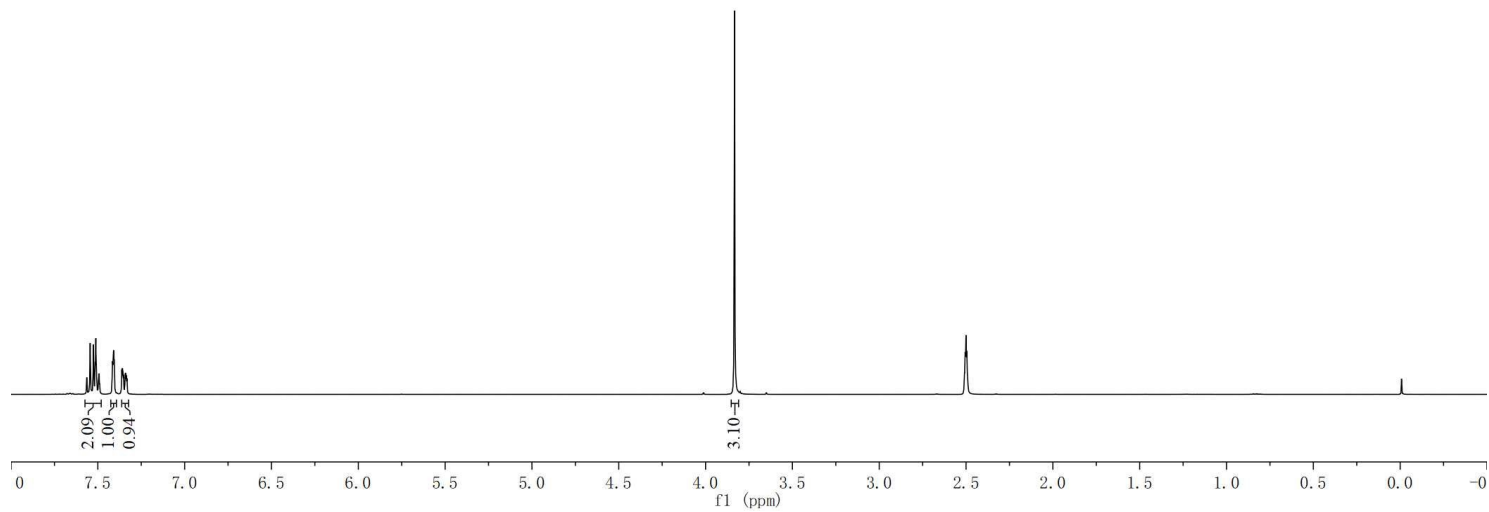

8.1655  
8.1451  
7.9674  
7.9482  
7.9438

2.5045  
2.4998  
2.4953

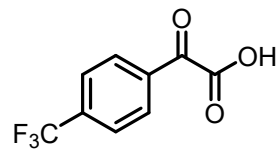

**2i** ( $^1\text{H}$  NMR 400 MHz,  $\text{DMSO-}d_6$ )

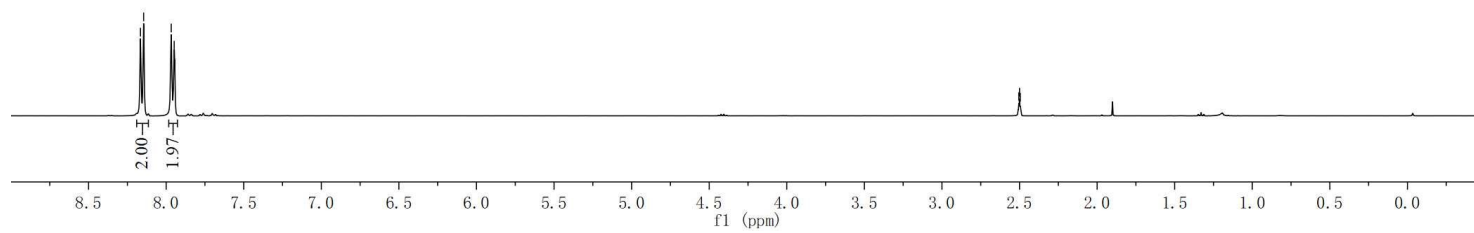

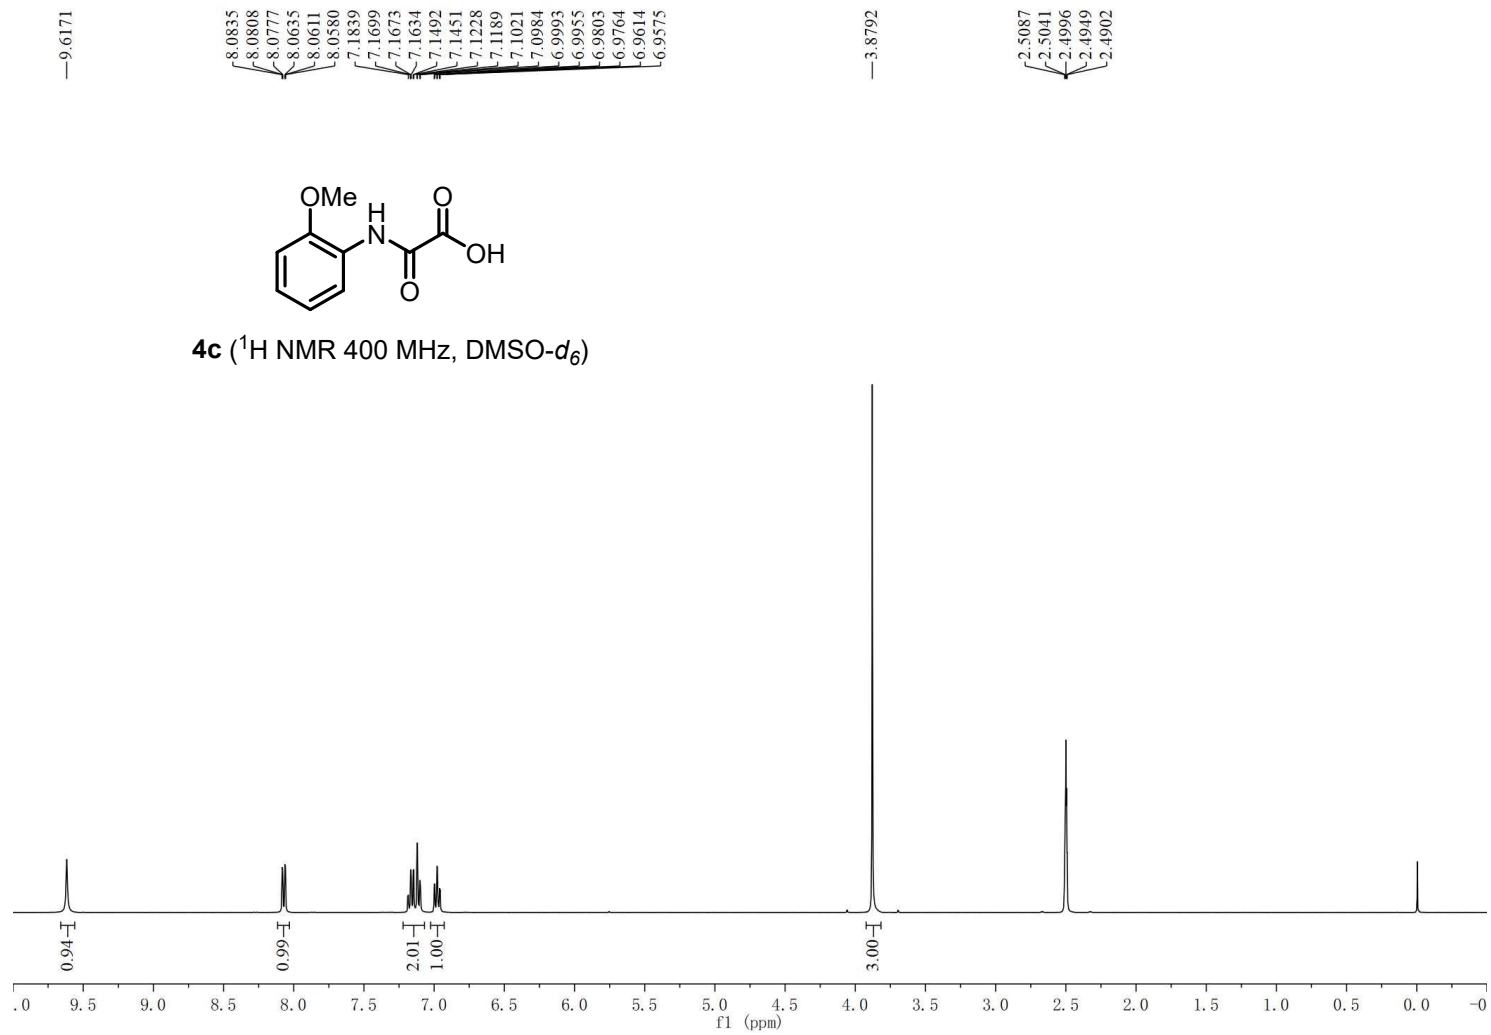



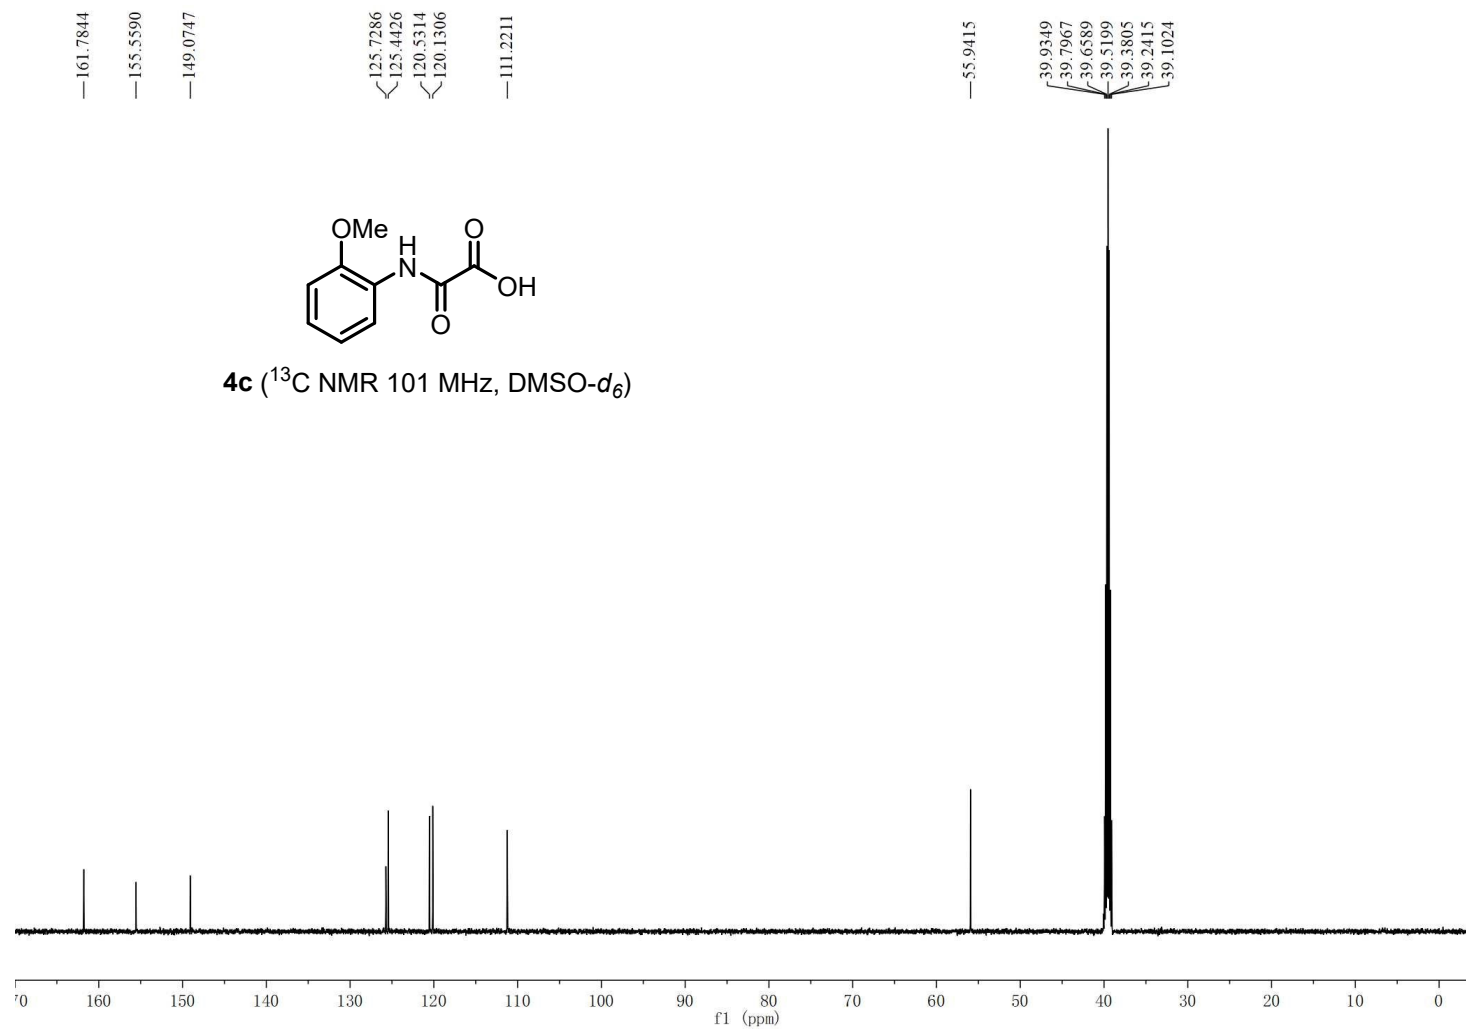

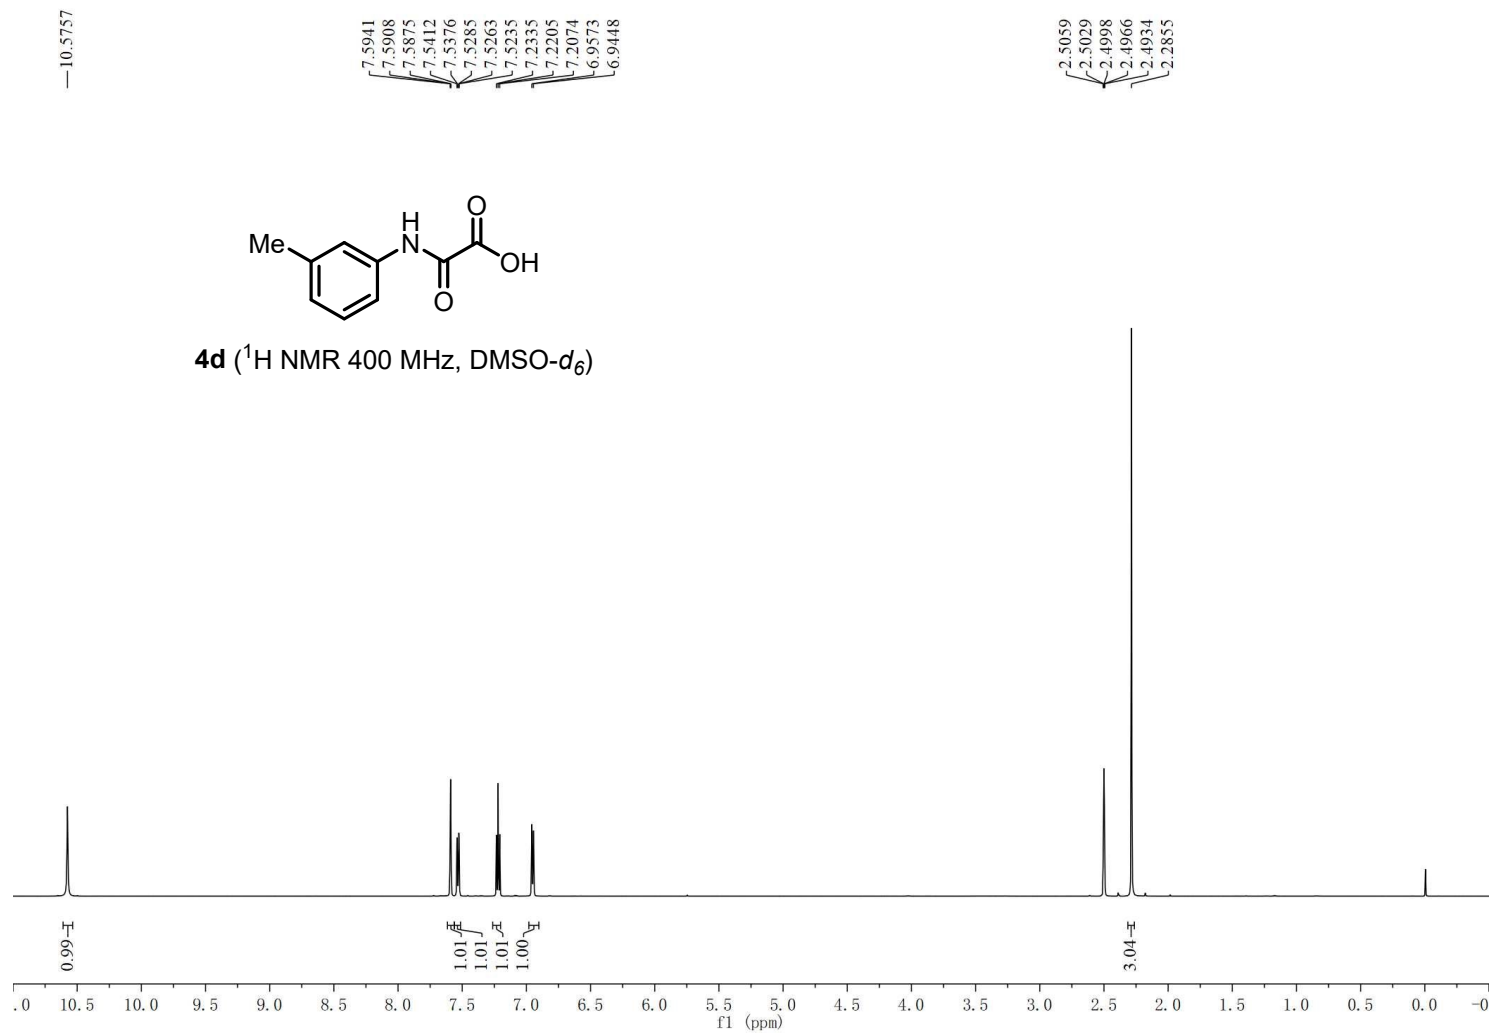

—7.8612

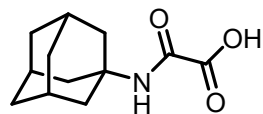

**4j** ( $^1\text{H}$  NMR 400 MHz,  $\text{DMSO}-d_6$ )

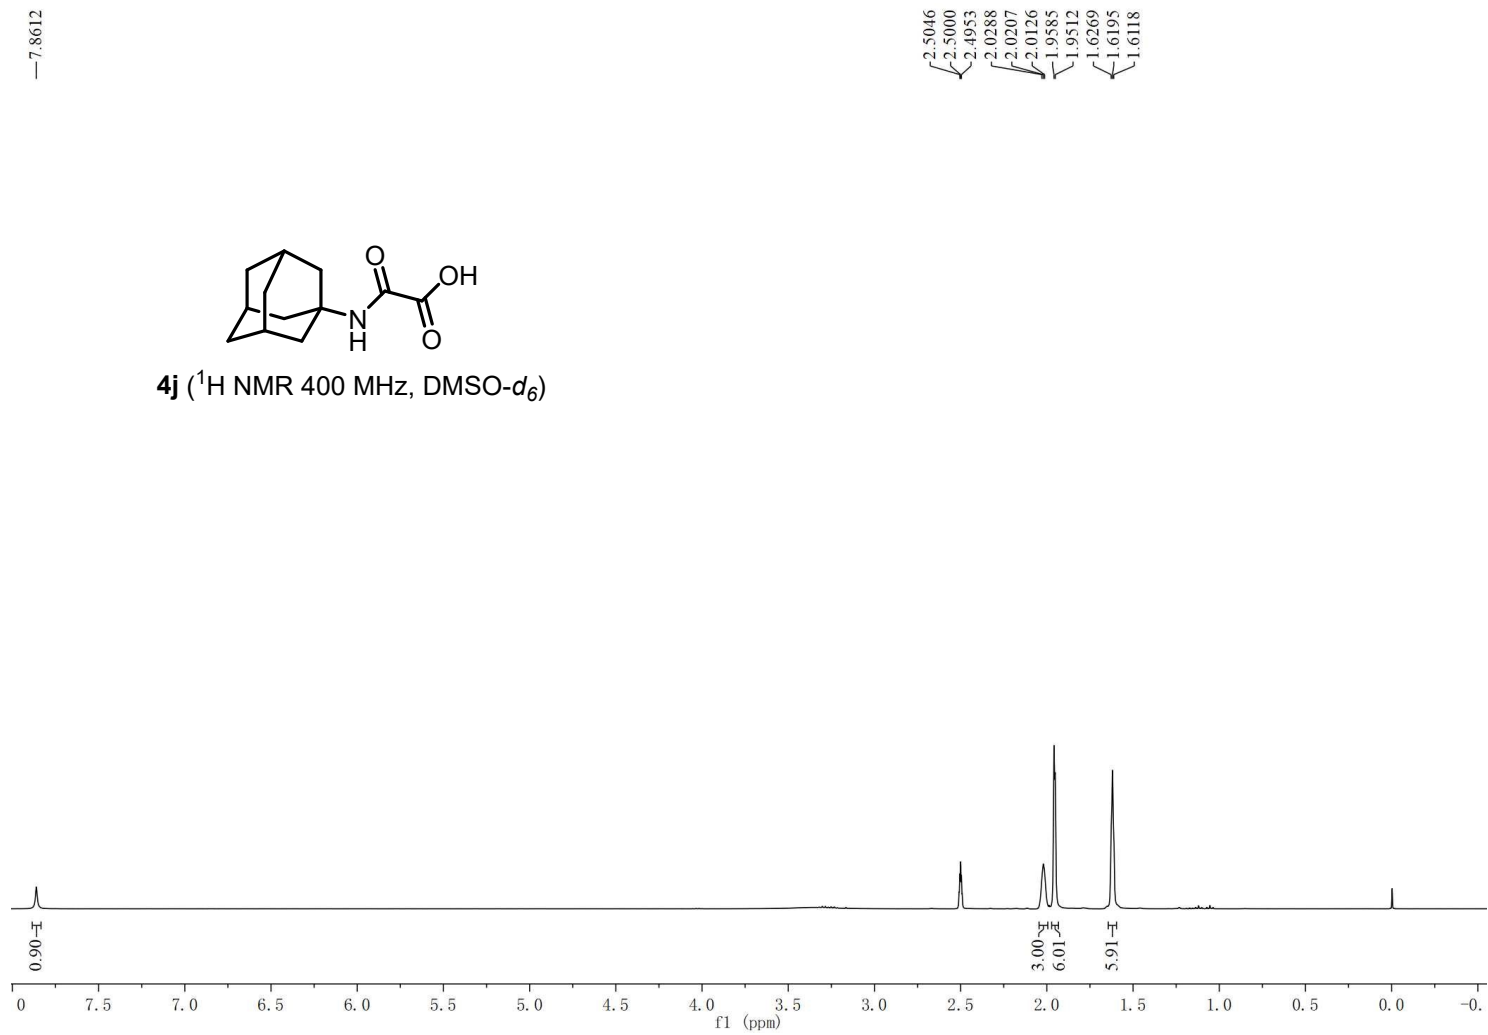

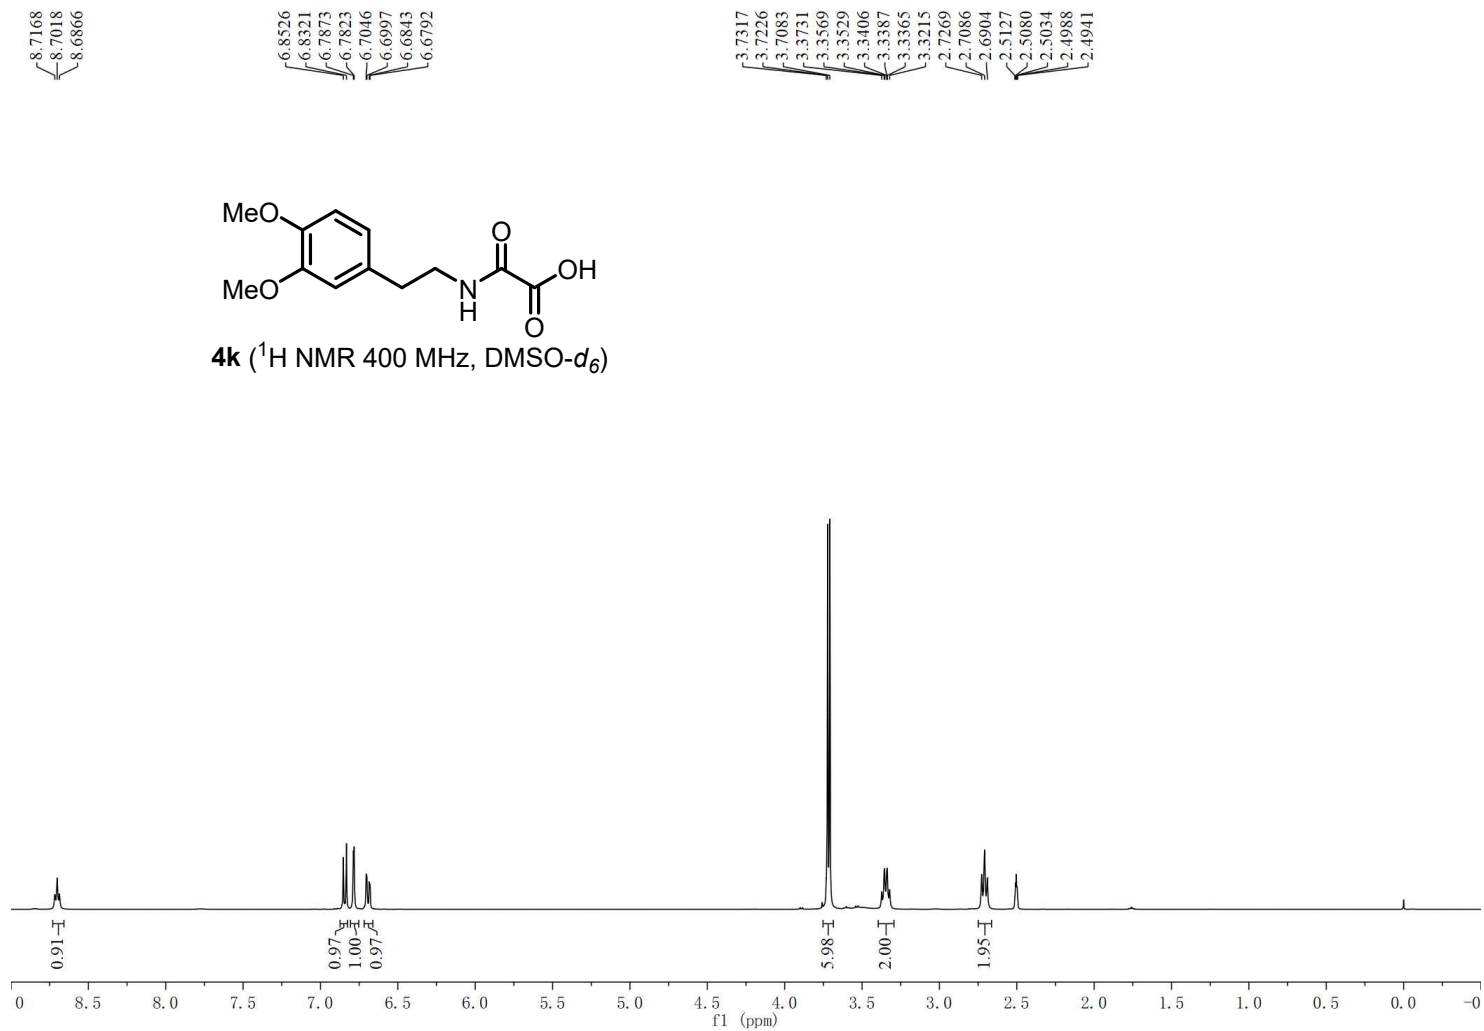

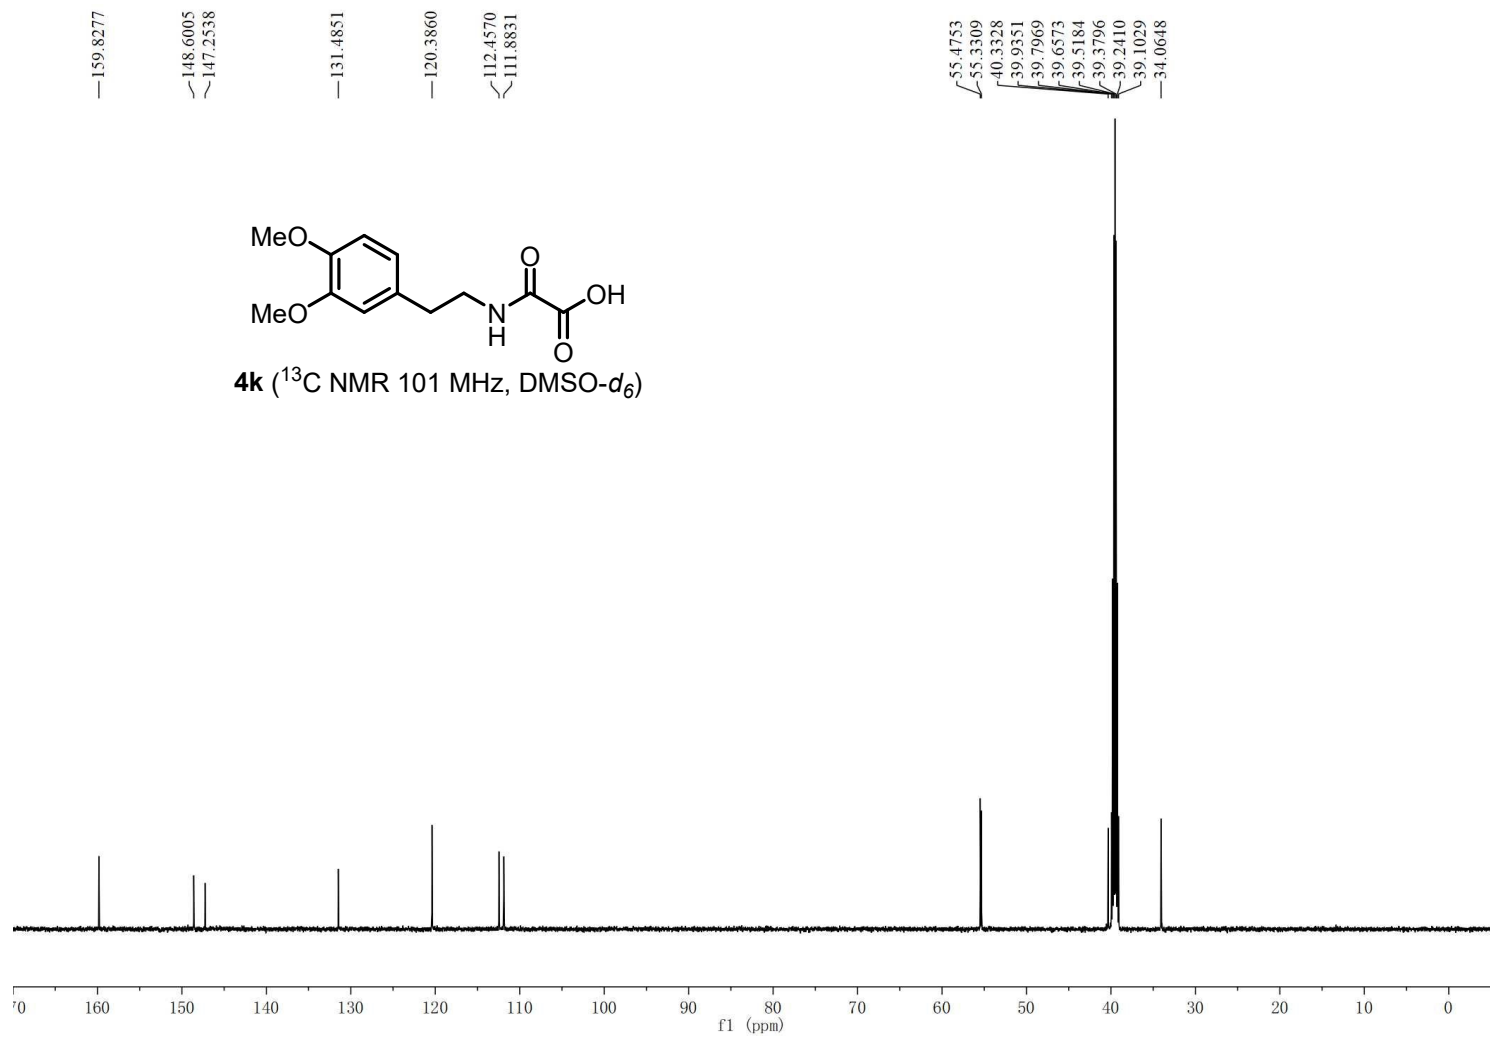

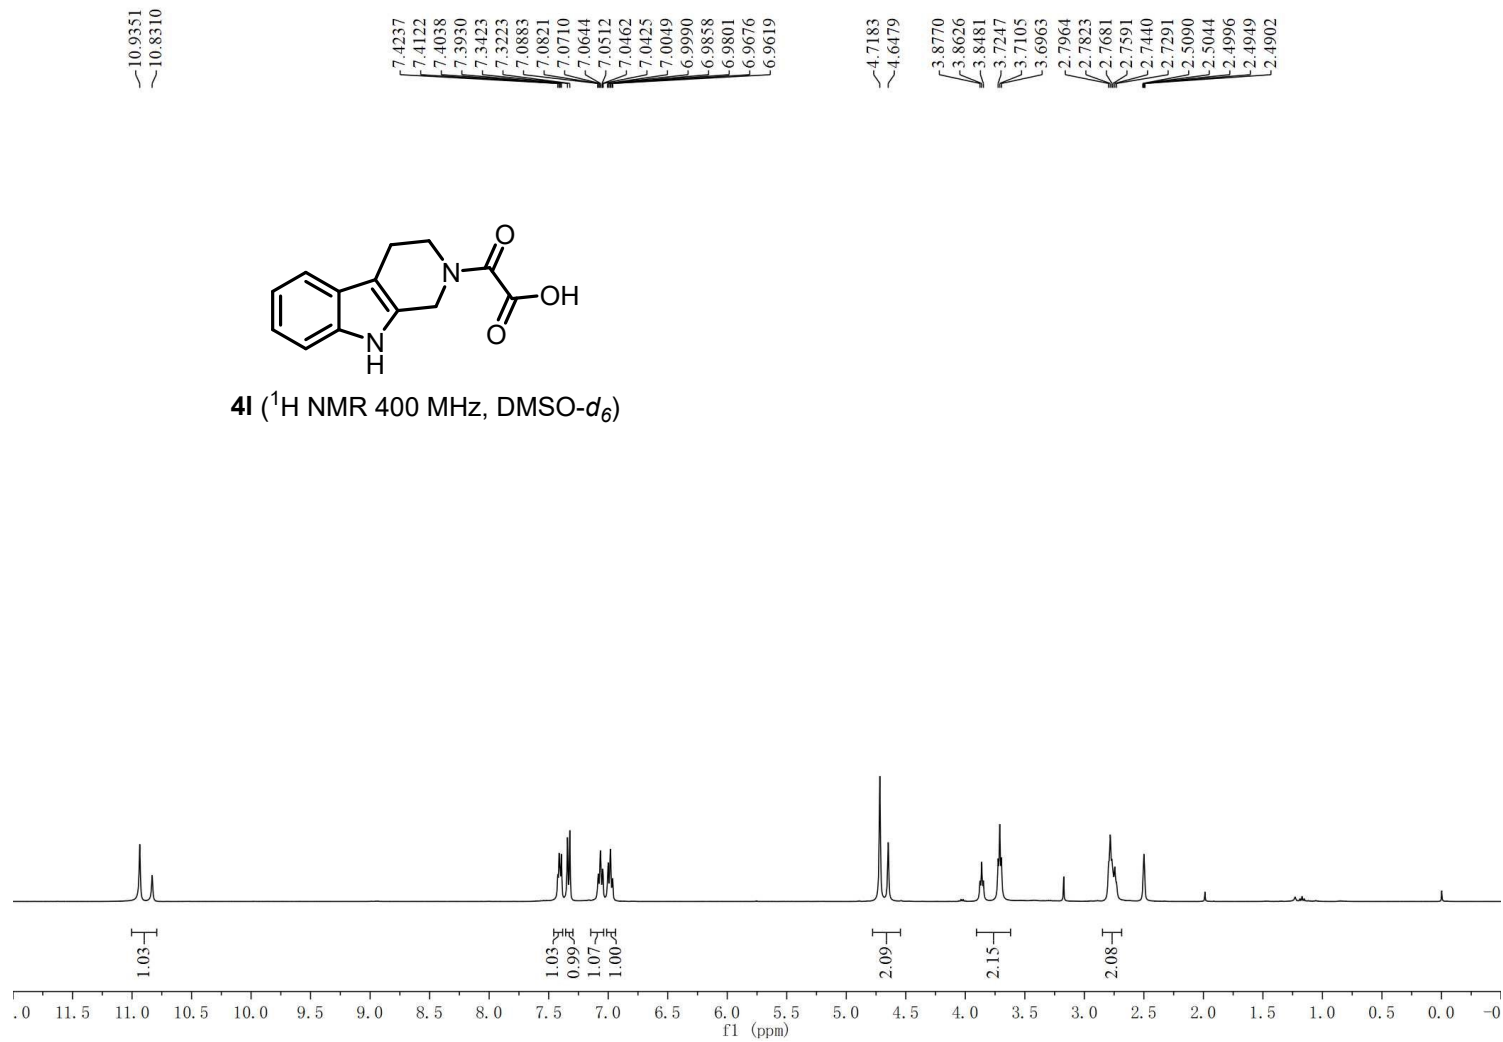

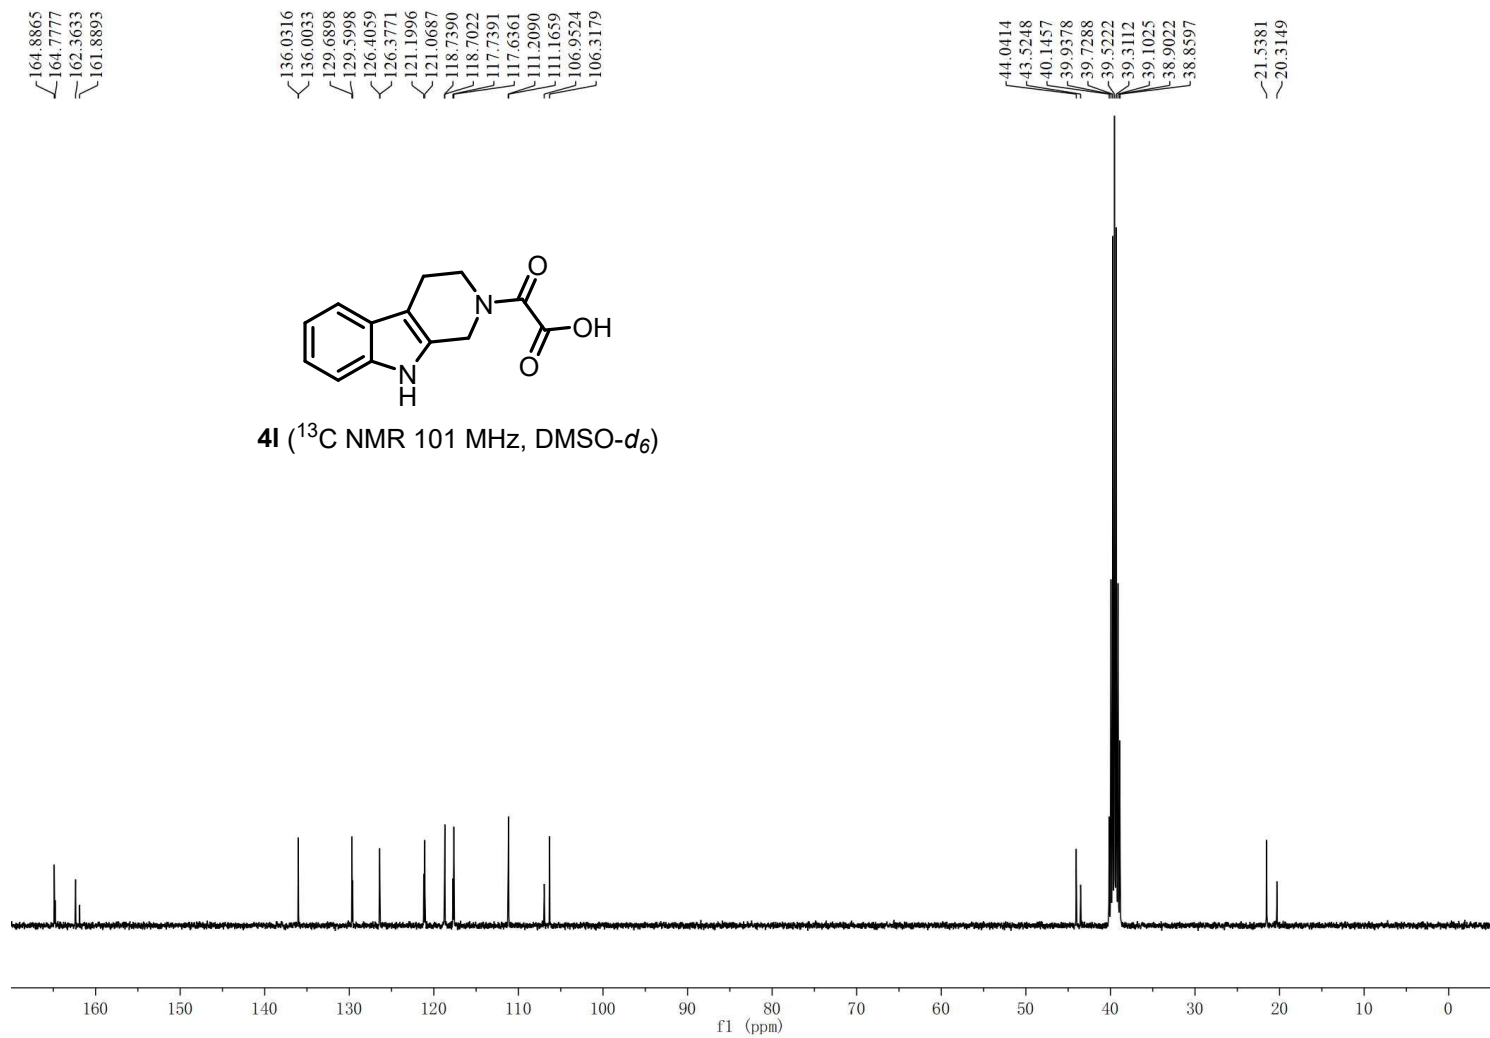

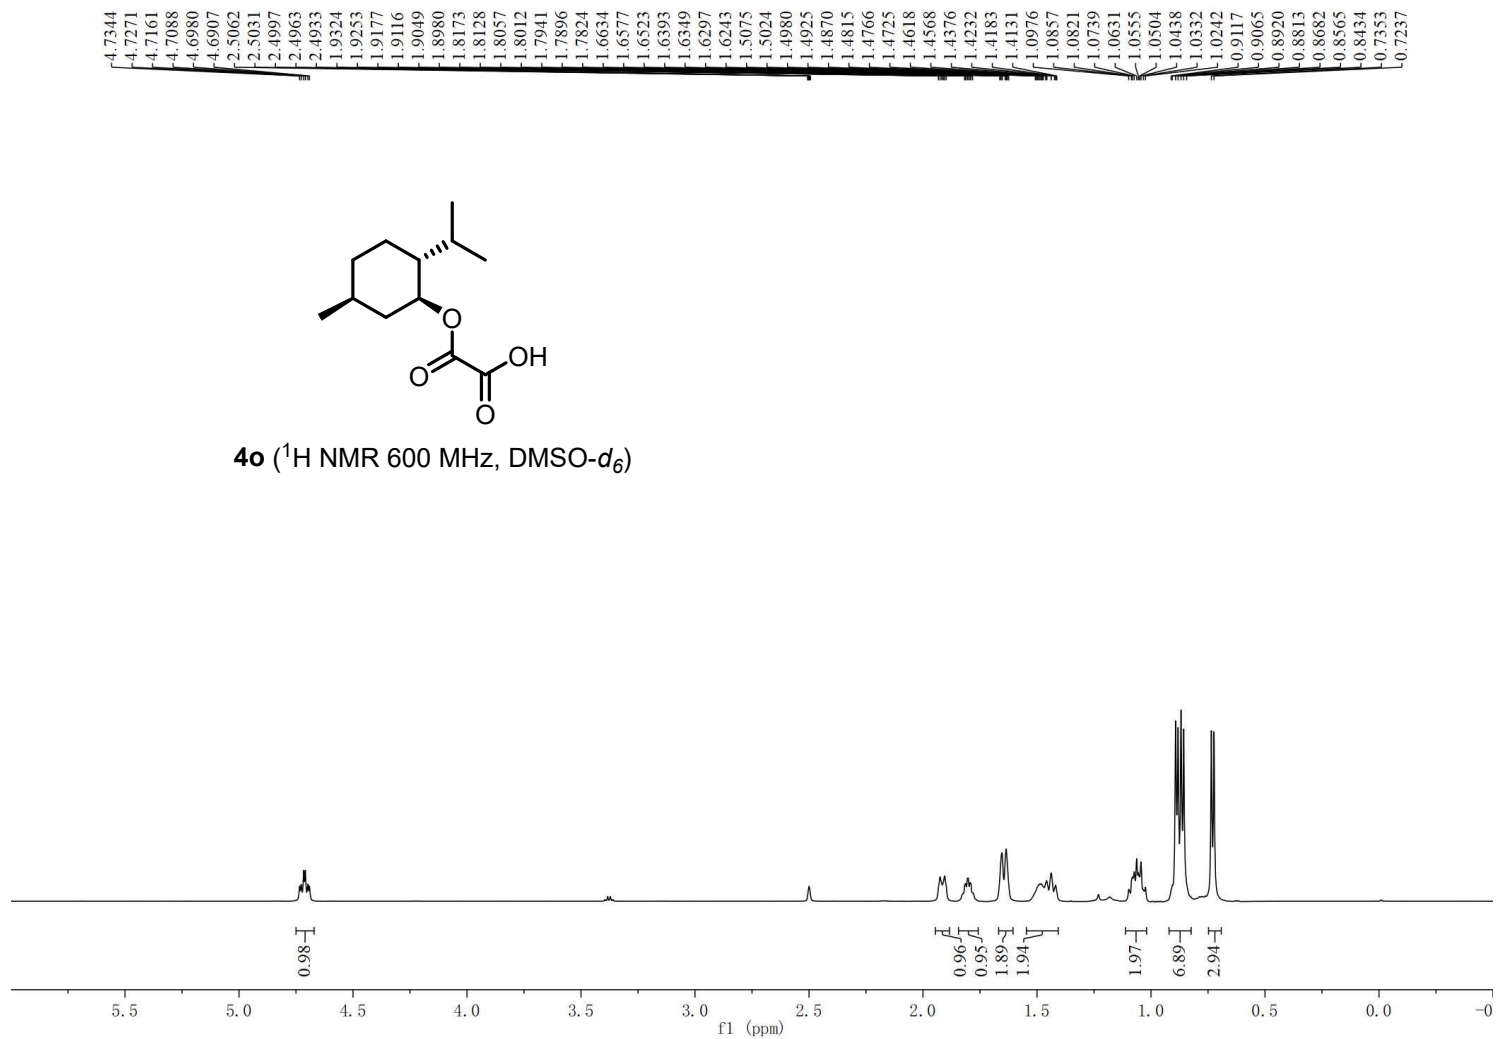



159.6676  
158.9560

75.9000

46.2290  
39.9413  
39.7974  
39.6582  
39.5198  
39.3809  
39.2414  
39.1021  
33.4802  
30.7617  
25.8738  
23.0664  
21.6960  
20.2762  
16.2519

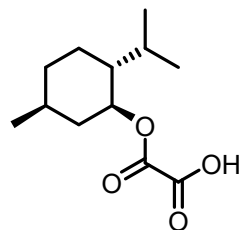

**4o** ( $^{13}\text{C}$  NMR 151 MHz,  $\text{DMSO-}d_6$ )

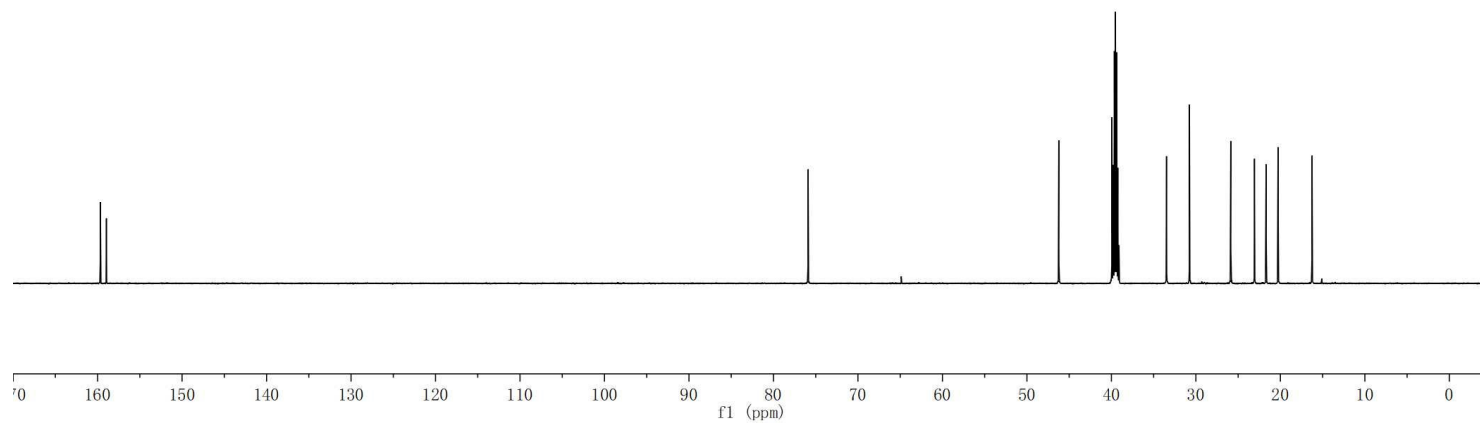

8.8118  
8.8090  
8.8025  
8.7997  
7.7539  
7.7511  
7.7446  
7.7417  
7.6142  
7.6036  
7.5992  
7.5946  
7.5914  
7.5886  
7.5856  
7.5827  
7.5780  
7.5607  
7.5572  
7.5533  
7.5503  
7.5470  
7.5443

2.5060  
2.5029  
2.4997  
2.4967  
2.4935

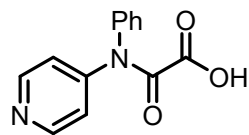

**4i** ( $^1\text{H}$  NMR 600 MHz,  $\text{DMSO-}d_6$ )

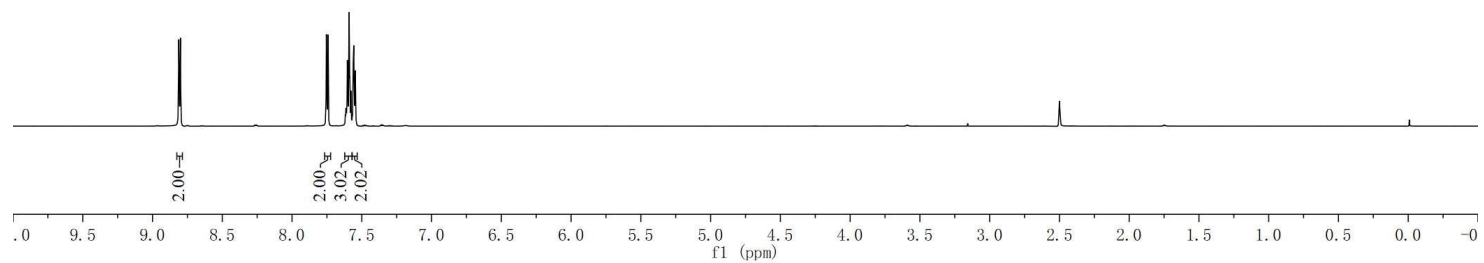

163.1462  
162.0311

153.7291

143.0748

136.8543

130.3601  
130.3047  
129.5196

118.8720

39.9356  
39.7971  
39.6581  
39.5188  
39.3802  
39.2405  
39.1012

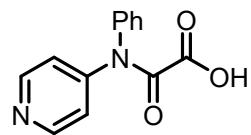

**4i** ( $^{13}\text{C}$  NMR 151 MHz,  $\text{DMSO-}d_6$ )

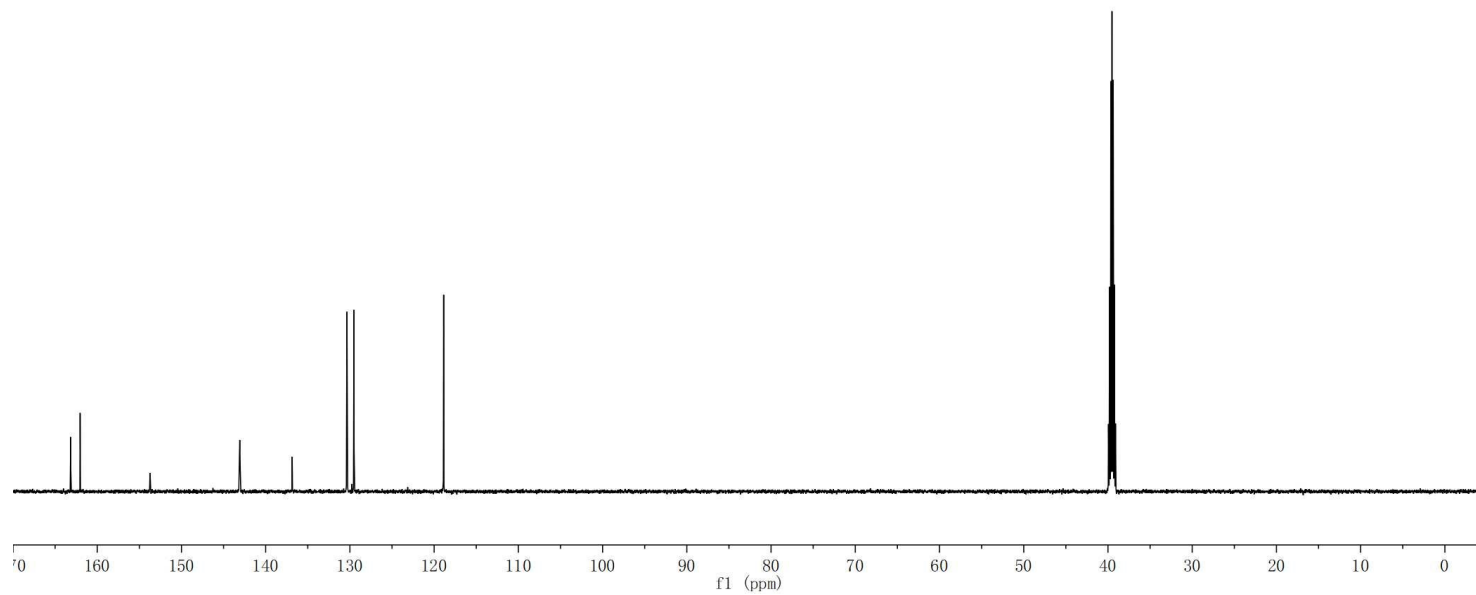

7.5357  
7.5318  
7.5281  
7.5244  
7.5152  
7.5119  
7.5092  
7.5053  
7.5021  
7.4980  
7.4944  
7.4906  
7.4860  
7.4800  
7.4718  
7.4667  
7.4536  
7.4485  
7.4441  
7.4397  
7.4349  
7.4302  
7.4261  
7.4219  
7.4185  
7.4154  
7.4123  
7.4077  
7.4038  
7.3990  
7.3943  
7.0609

2.5089  
2.5043  
2.4997  
2.4950  
2.4902

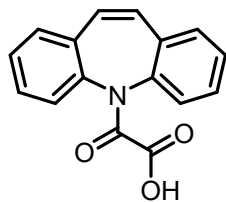

**4m** ( $^1\text{H}$  NMR 400 MHz,  $\text{DMSO-}d_6$ )

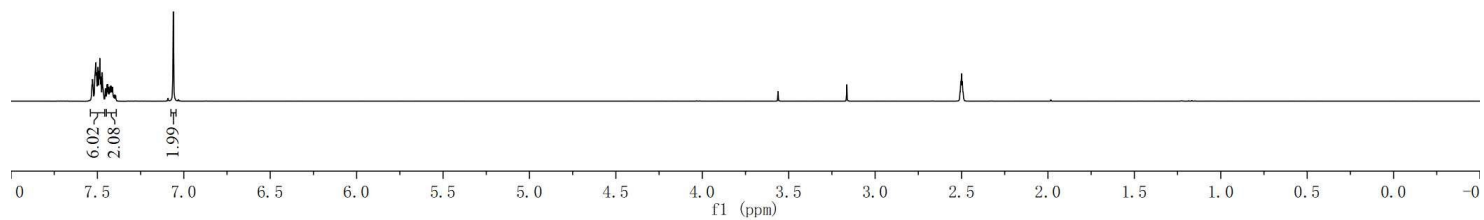

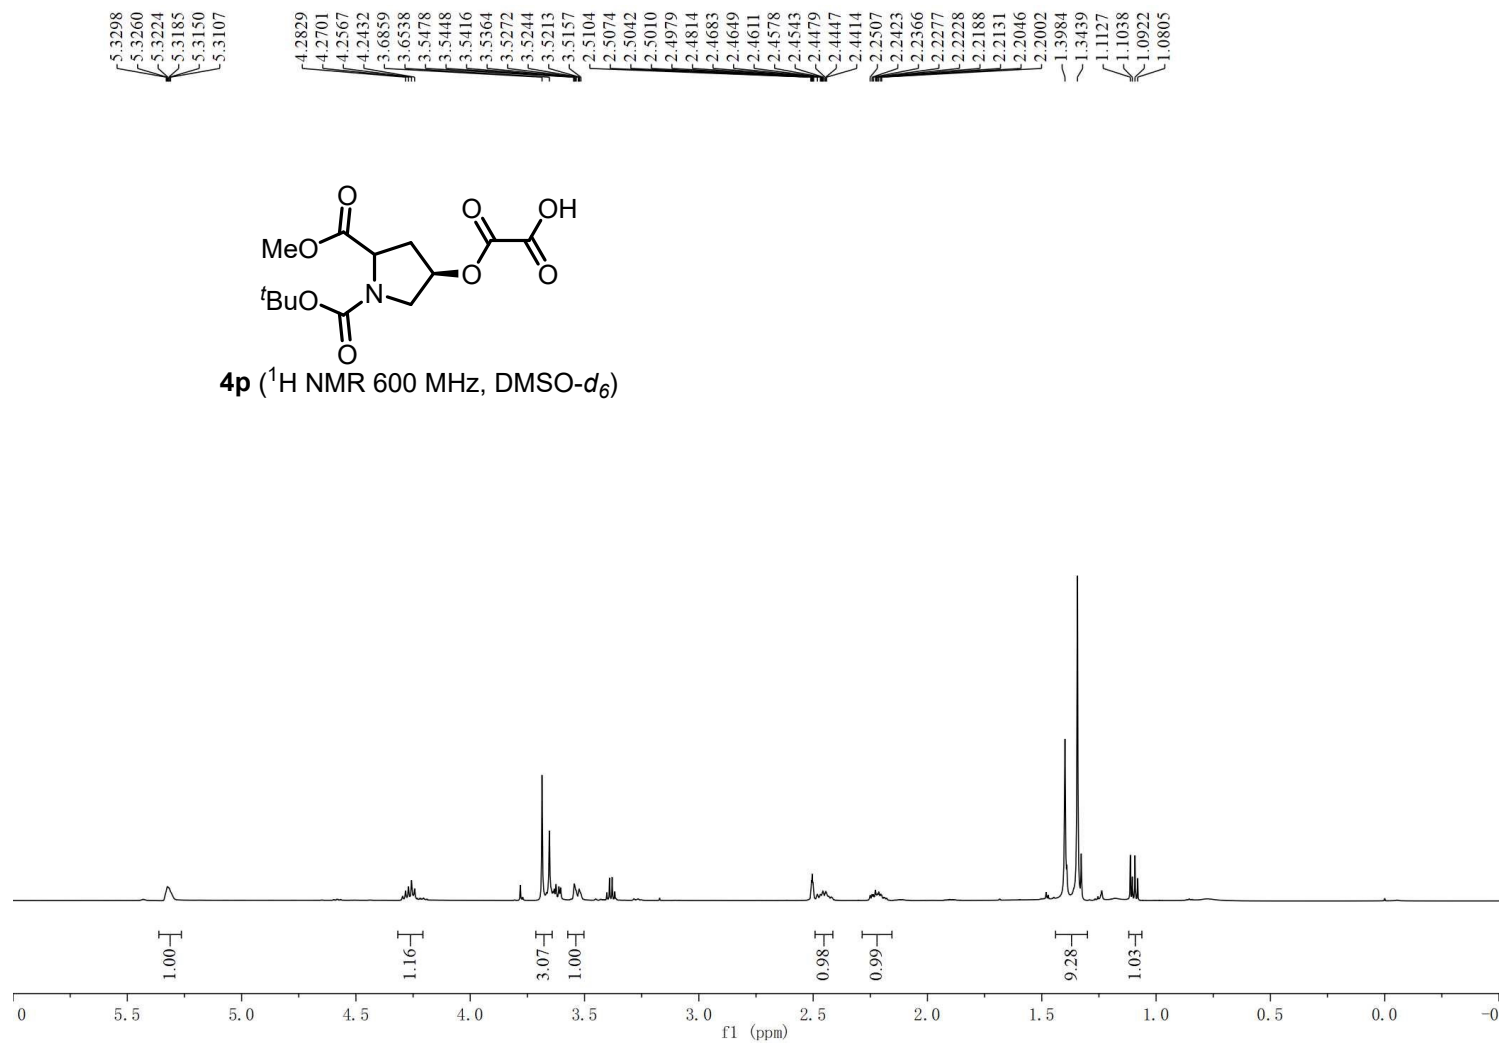

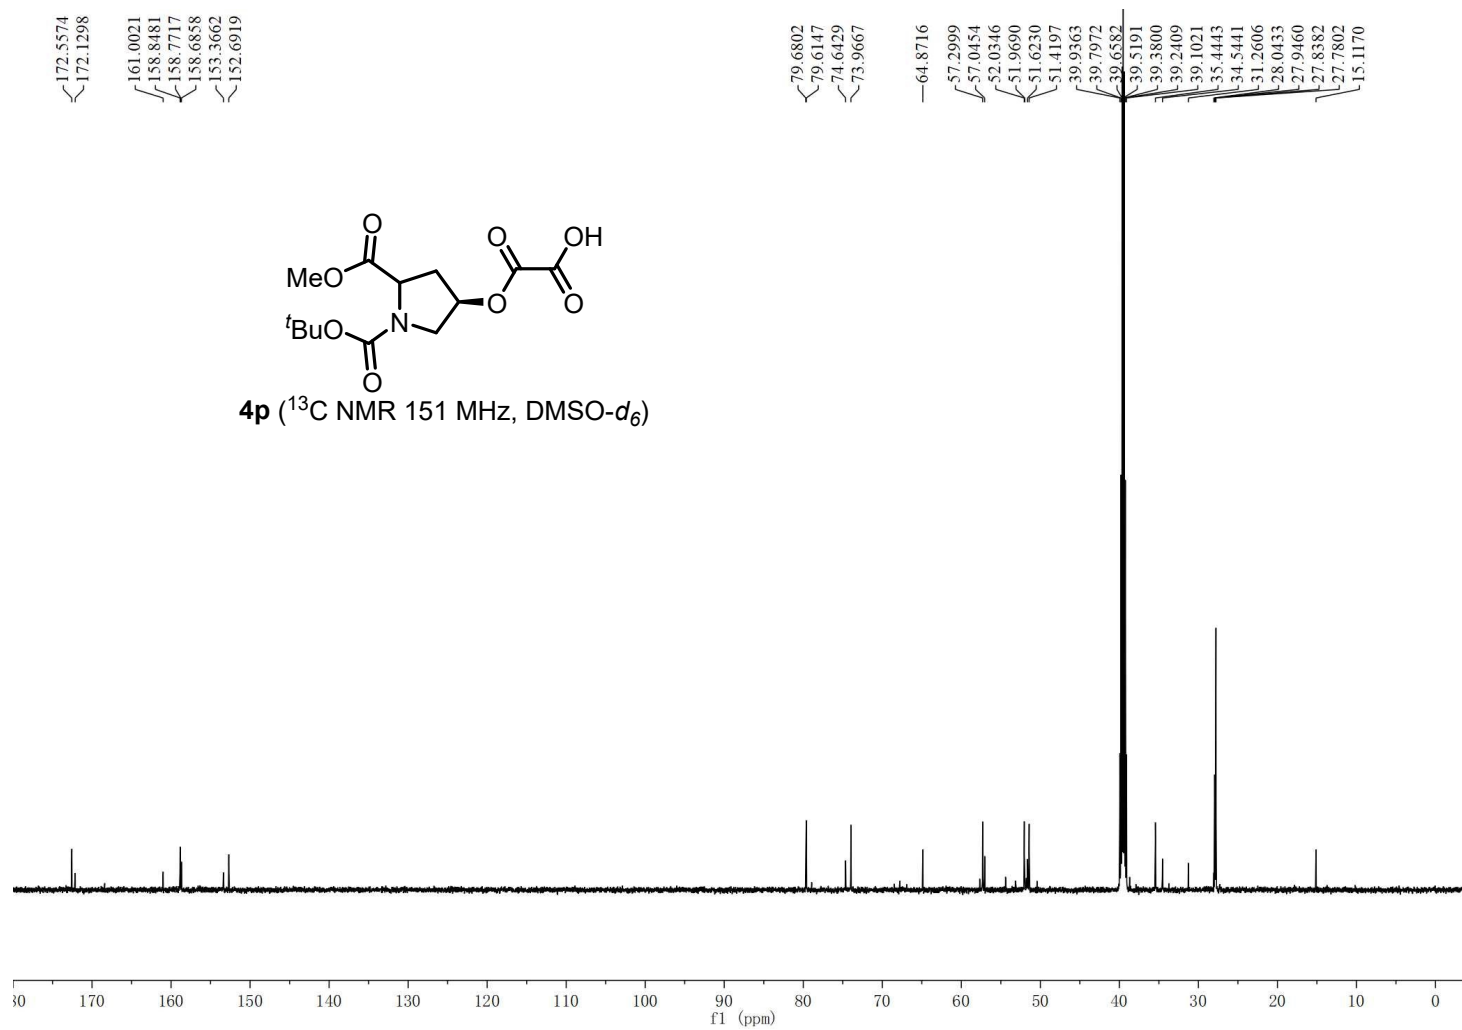

7.9156  
7.9110  
7.9080  
7.9044  
7.8954  
7.8905  
7.8867  
7.6227  
7.6194  
7.6161  
7.6056  
7.6009  
7.5964  
7.5857  
7.5823  
7.5789  
7.4917  
7.4876  
7.4835  
7.4707  
7.4676  
7.4643  
7.4533  
7.4489  
7.4459  
7.2606

3.0733  
2.9142

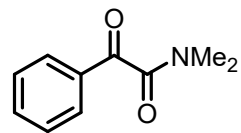

**3a** ( $^1\text{H}$  NMR 400 MHz,  $\text{CDCl}_3$ )

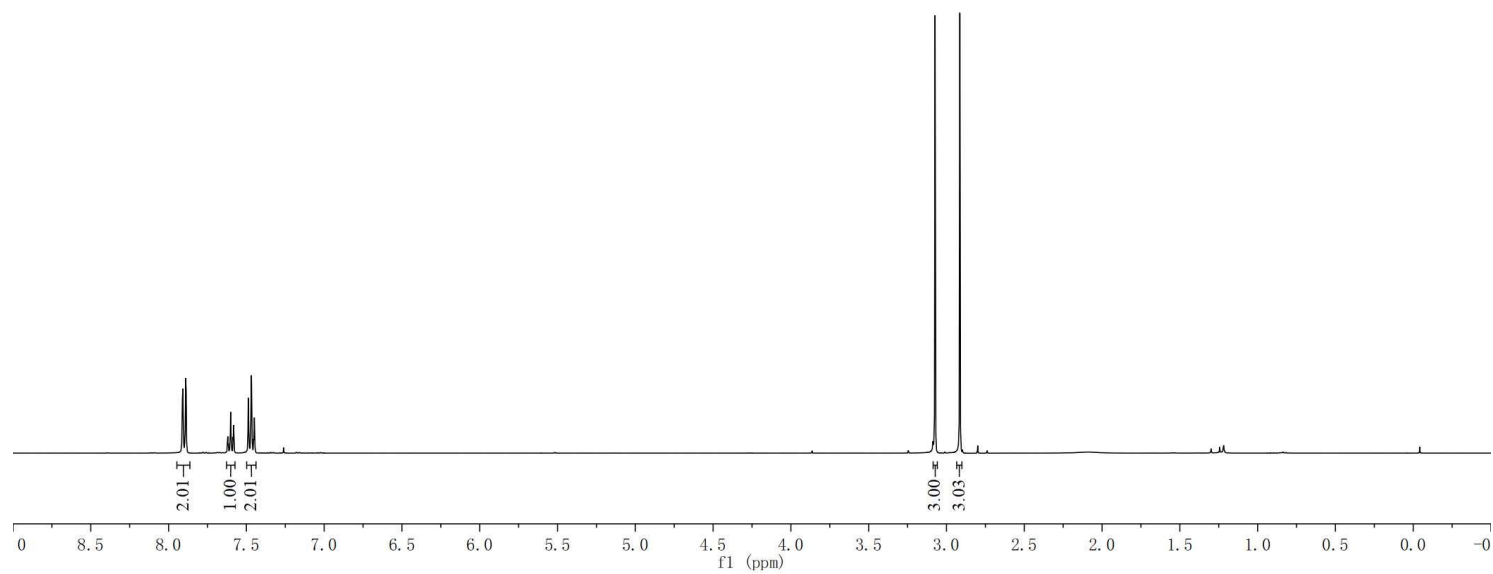

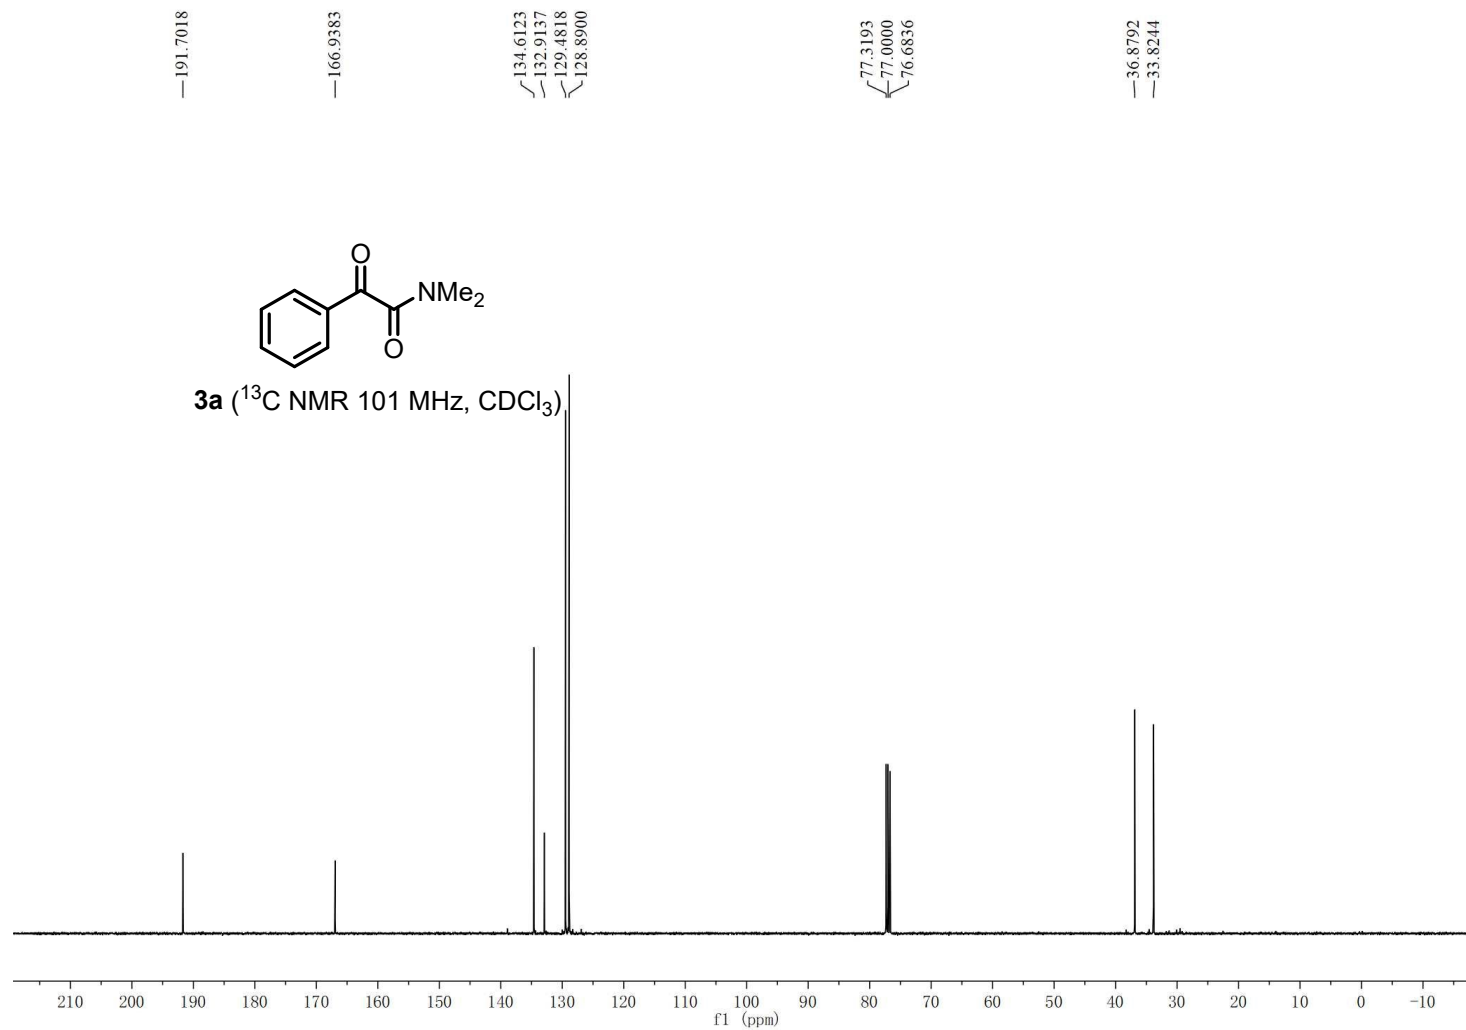



7.8396  
7.8355  
7.8236  
7.8190  
7.3085  
7.3064  
7.3032  
7.2868  
7.2598

3.1038  
2.9424

2.4266

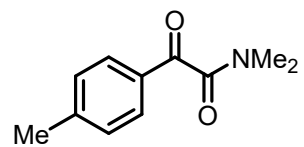

**3b** ( $^1\text{H}$  NMR 400 MHz,  $\text{CDCl}_3$ )

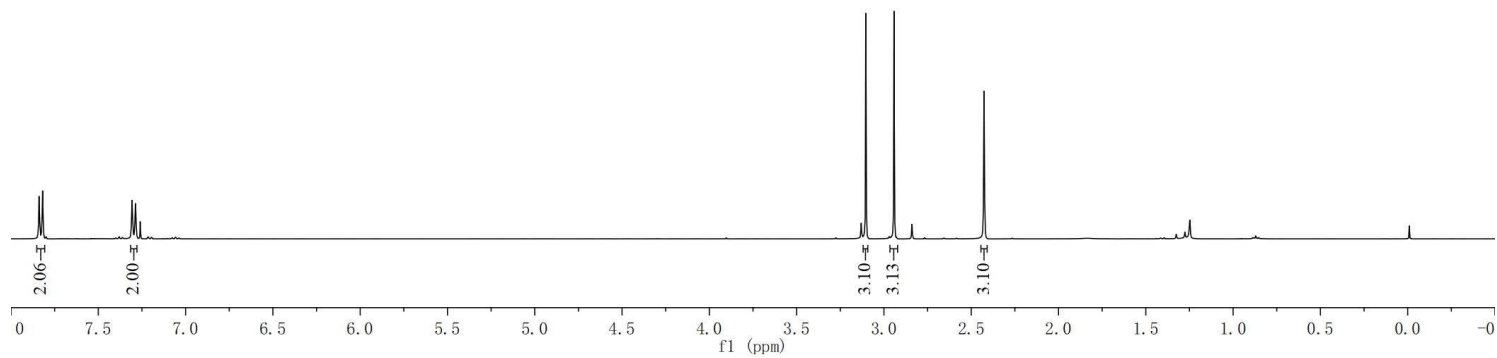

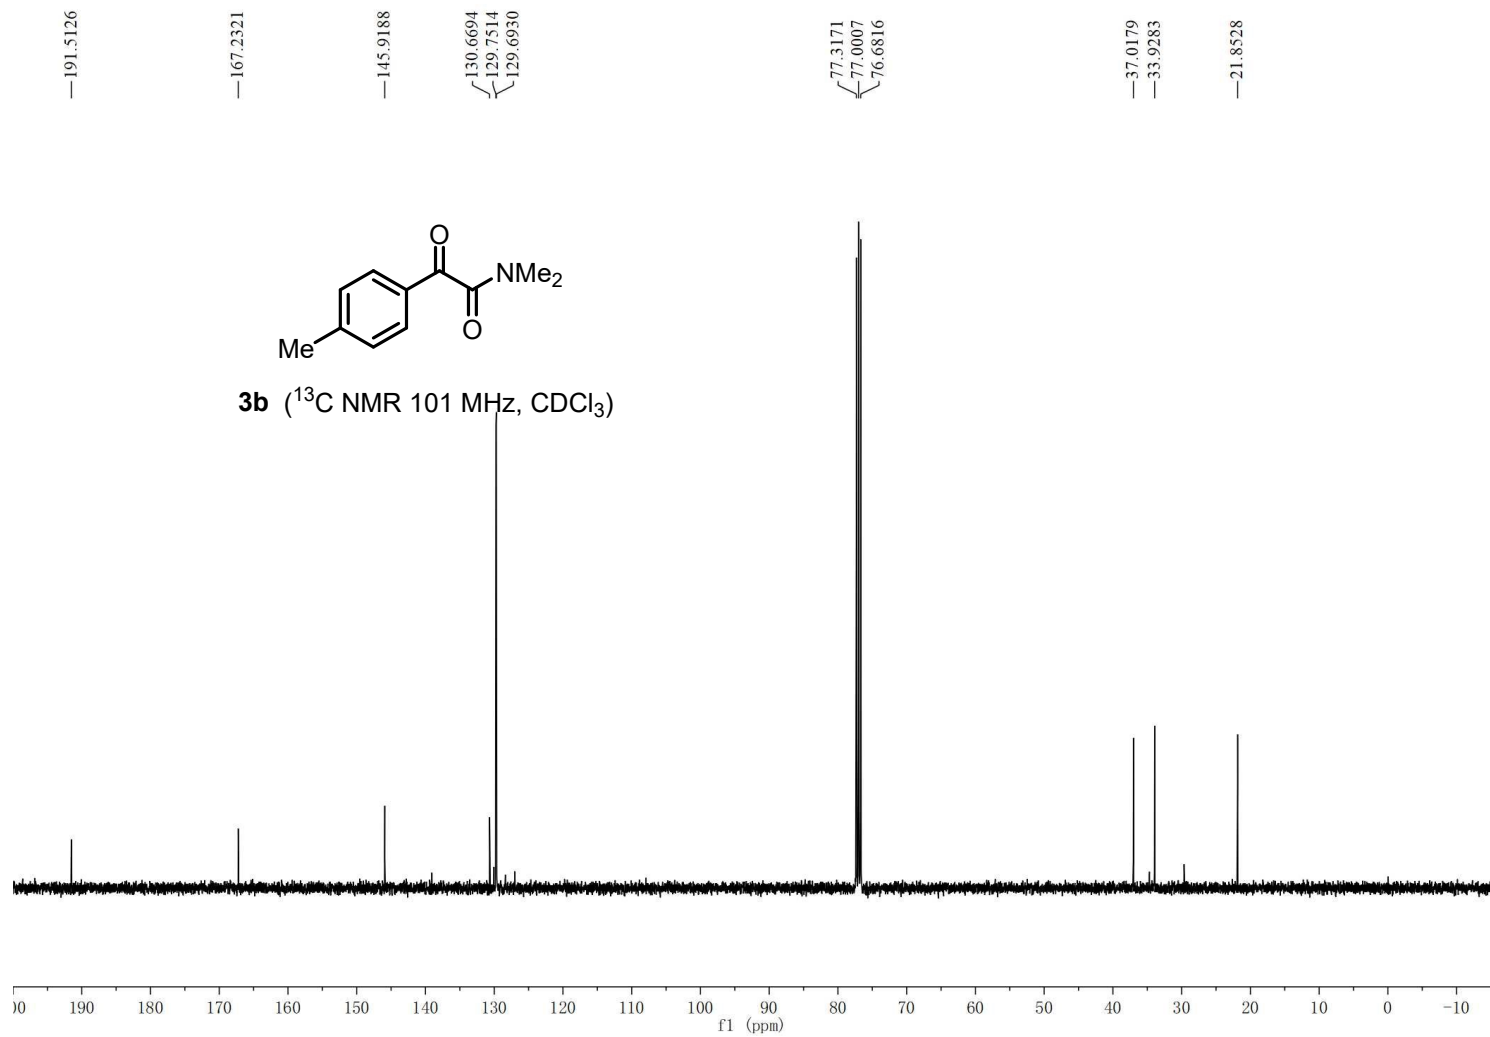

7.8158  
7.7944  
7.6552  
7.6338  
7.2596

3.1035  
2.9504

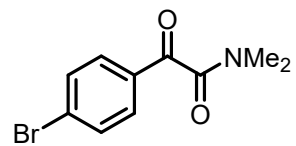

**3c** ( $^1\text{H}$  NMR 400 MHz,  $\text{CDCl}_3$ )

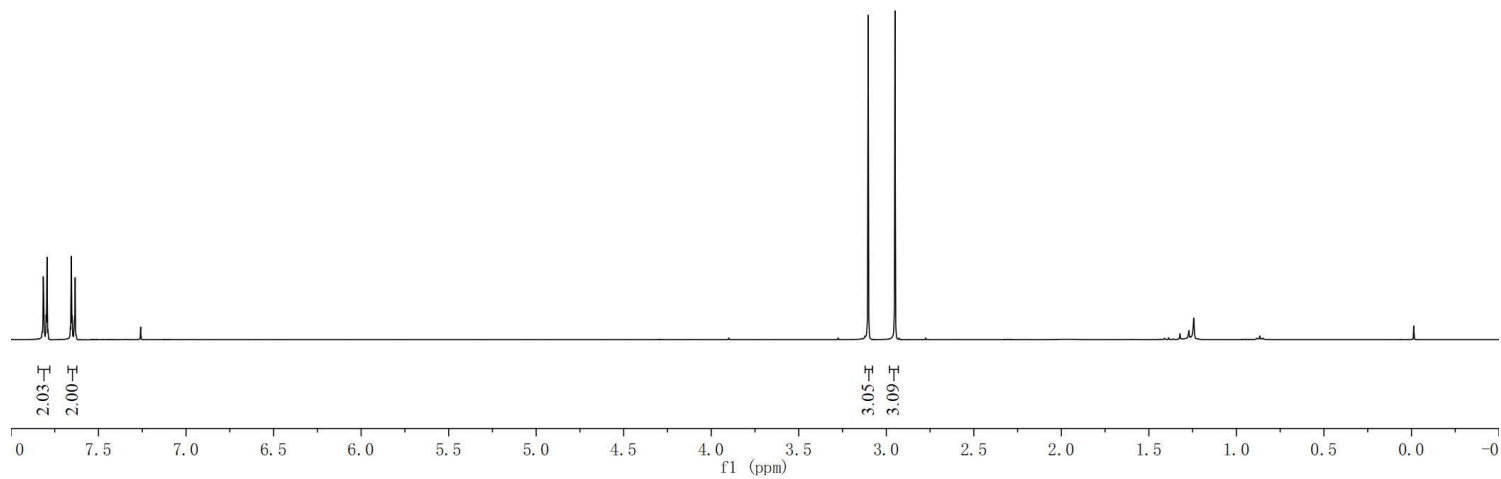

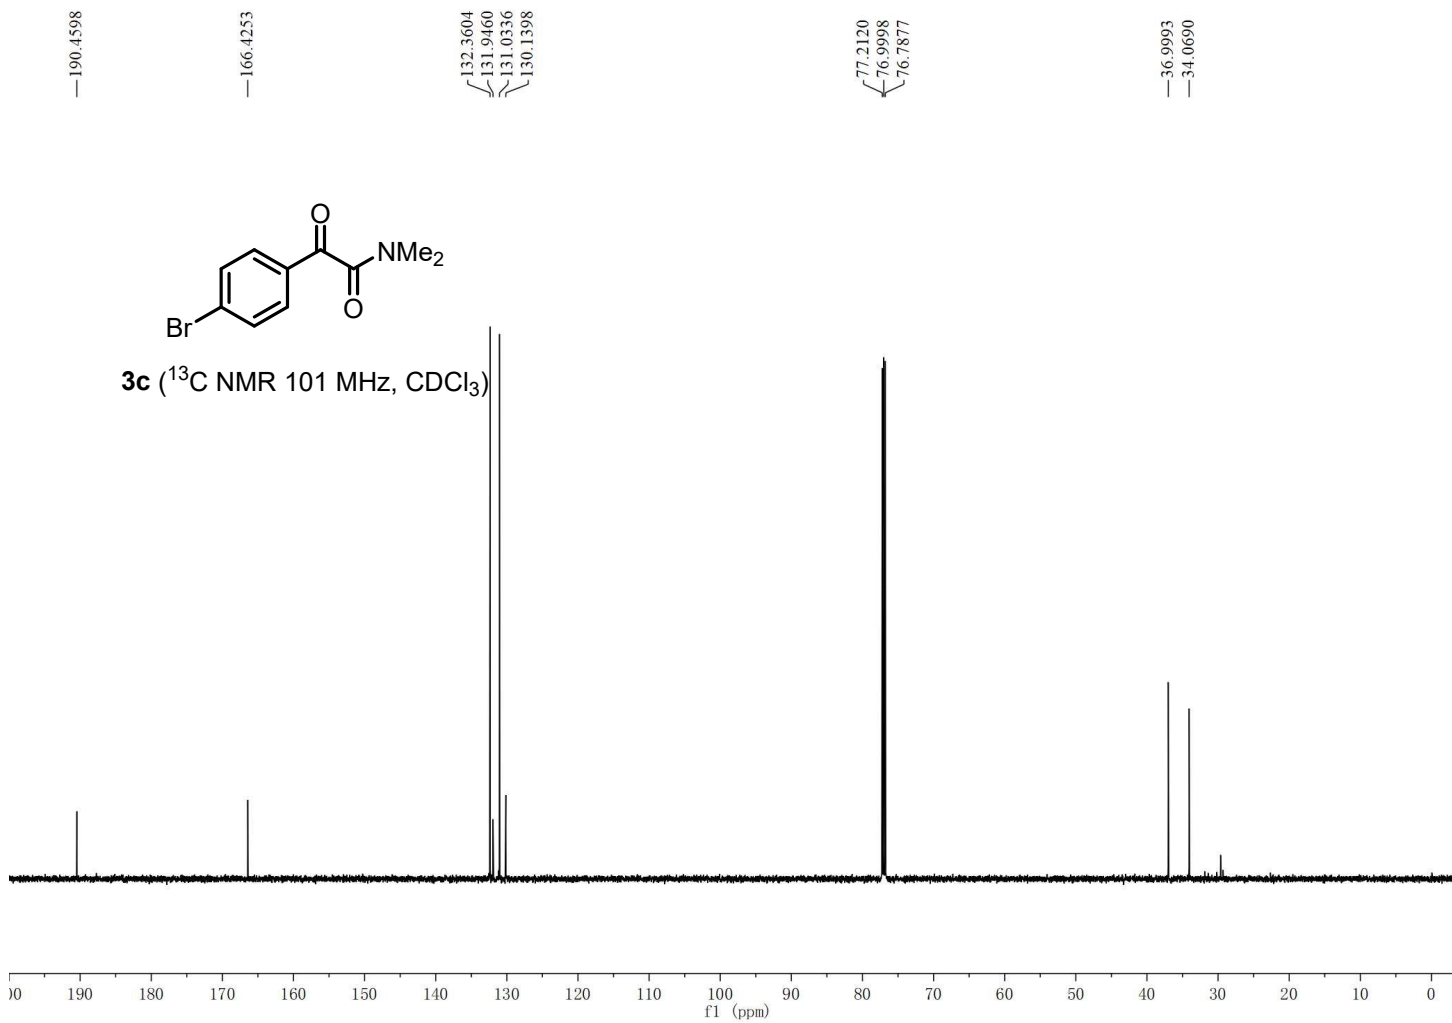

7.9929  
7.9795  
7.9751  
7.9706  
7.9573

7.2596  
7.1900  
7.1683  
7.1471

3.1024  
2.9545

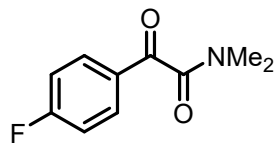

**3d** ( $^1\text{H}$  NMR 400 MHz,  $\text{CDCl}_3$ )

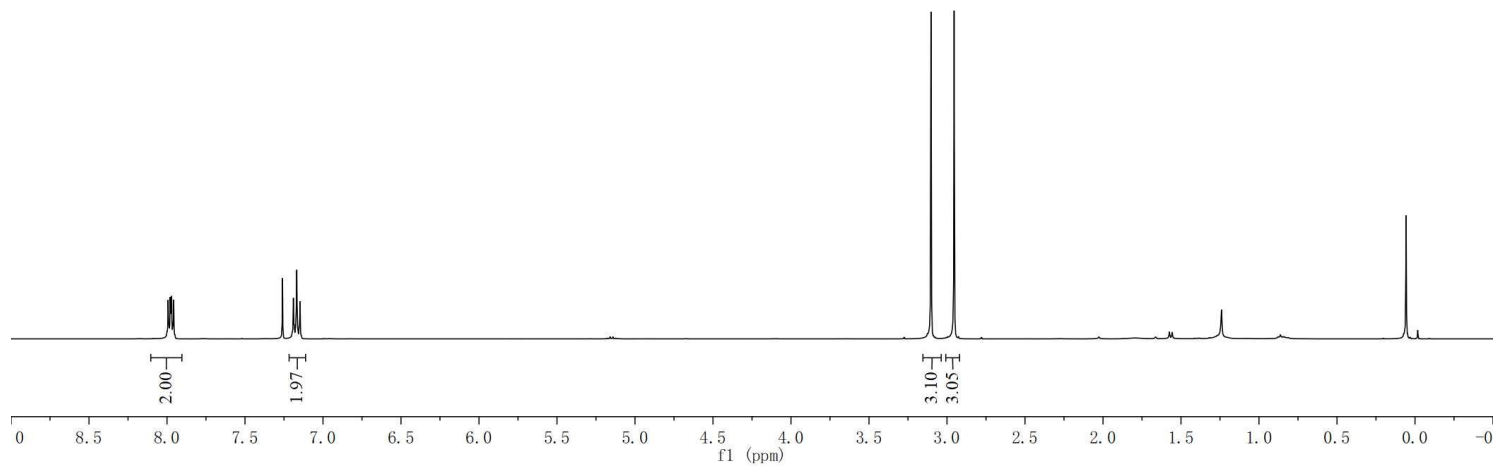

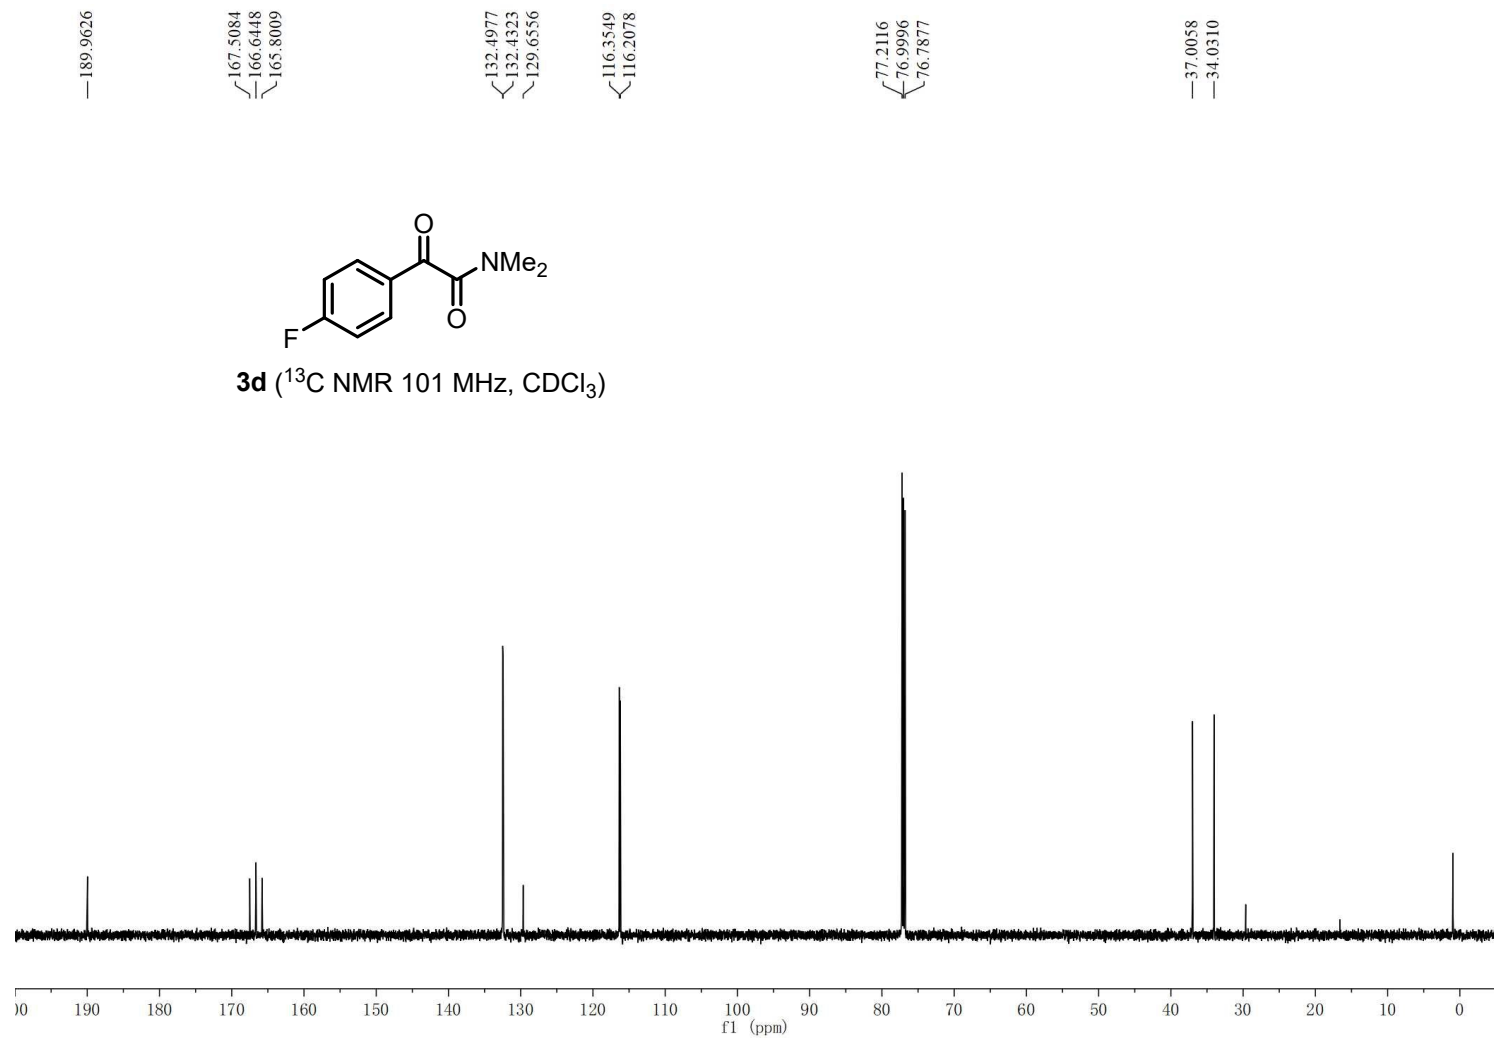

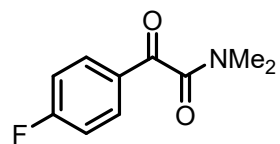

**3d** ( $^{19}\text{F}$  NMR 376 MHz,  $\text{CDCl}_3$ )

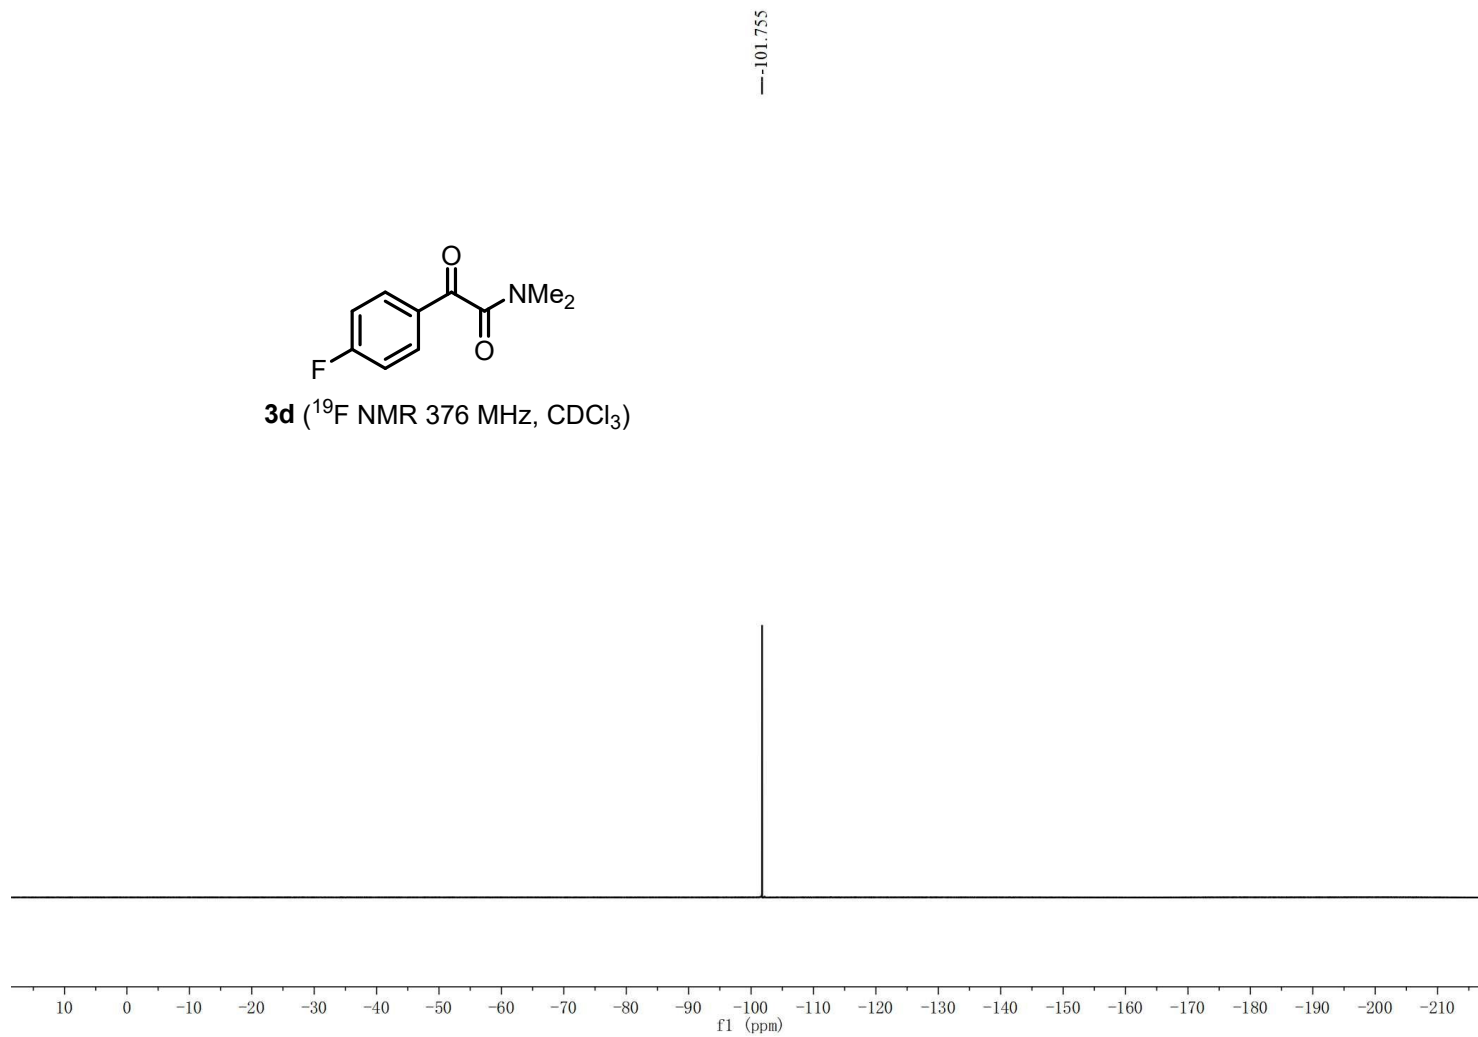

7.6894  
7.6867  
7.6751  
7.6730  
7.4679  
7.4655  
7.4554  
7.4531  
7.3135  
7.3013  
7.2888  
7.2604

3.0994  
2.9671  
2.6542

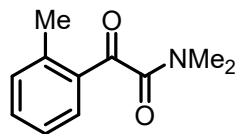

**3e** ( $^1\text{H}$  NMR 400 MHz,  $\text{CDCl}_3$ )

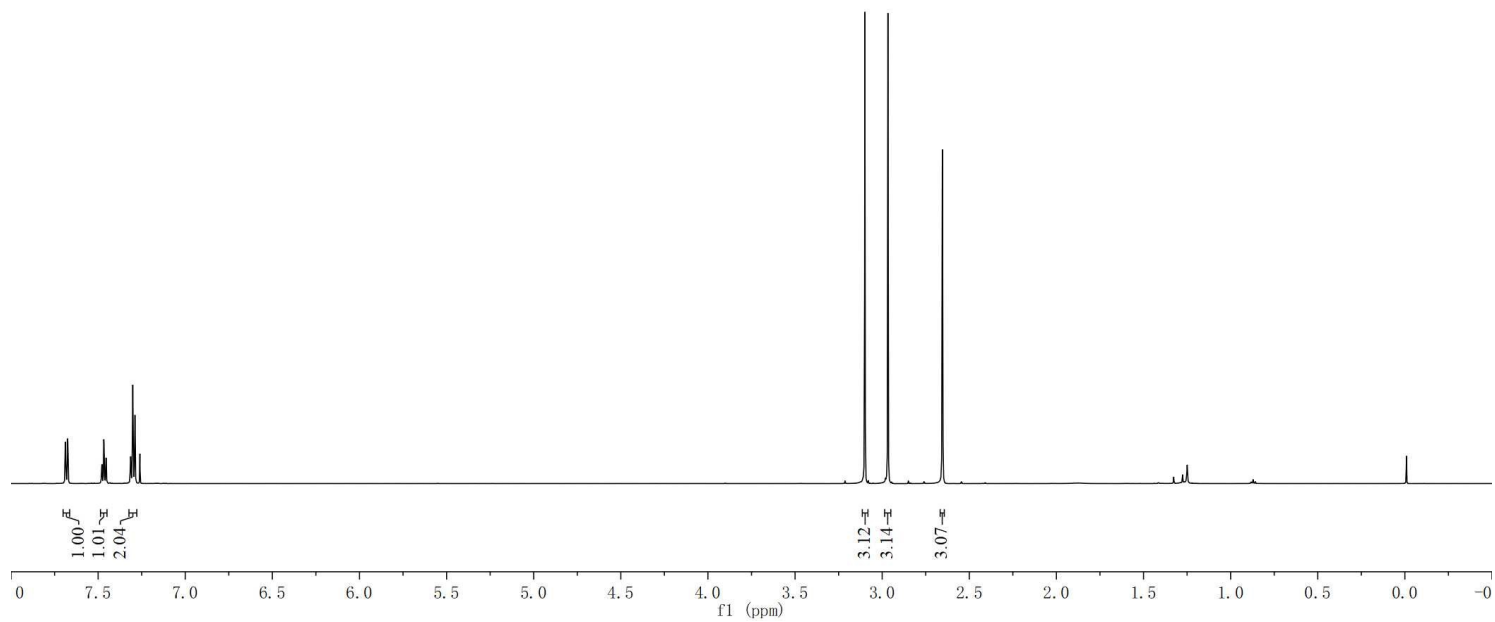



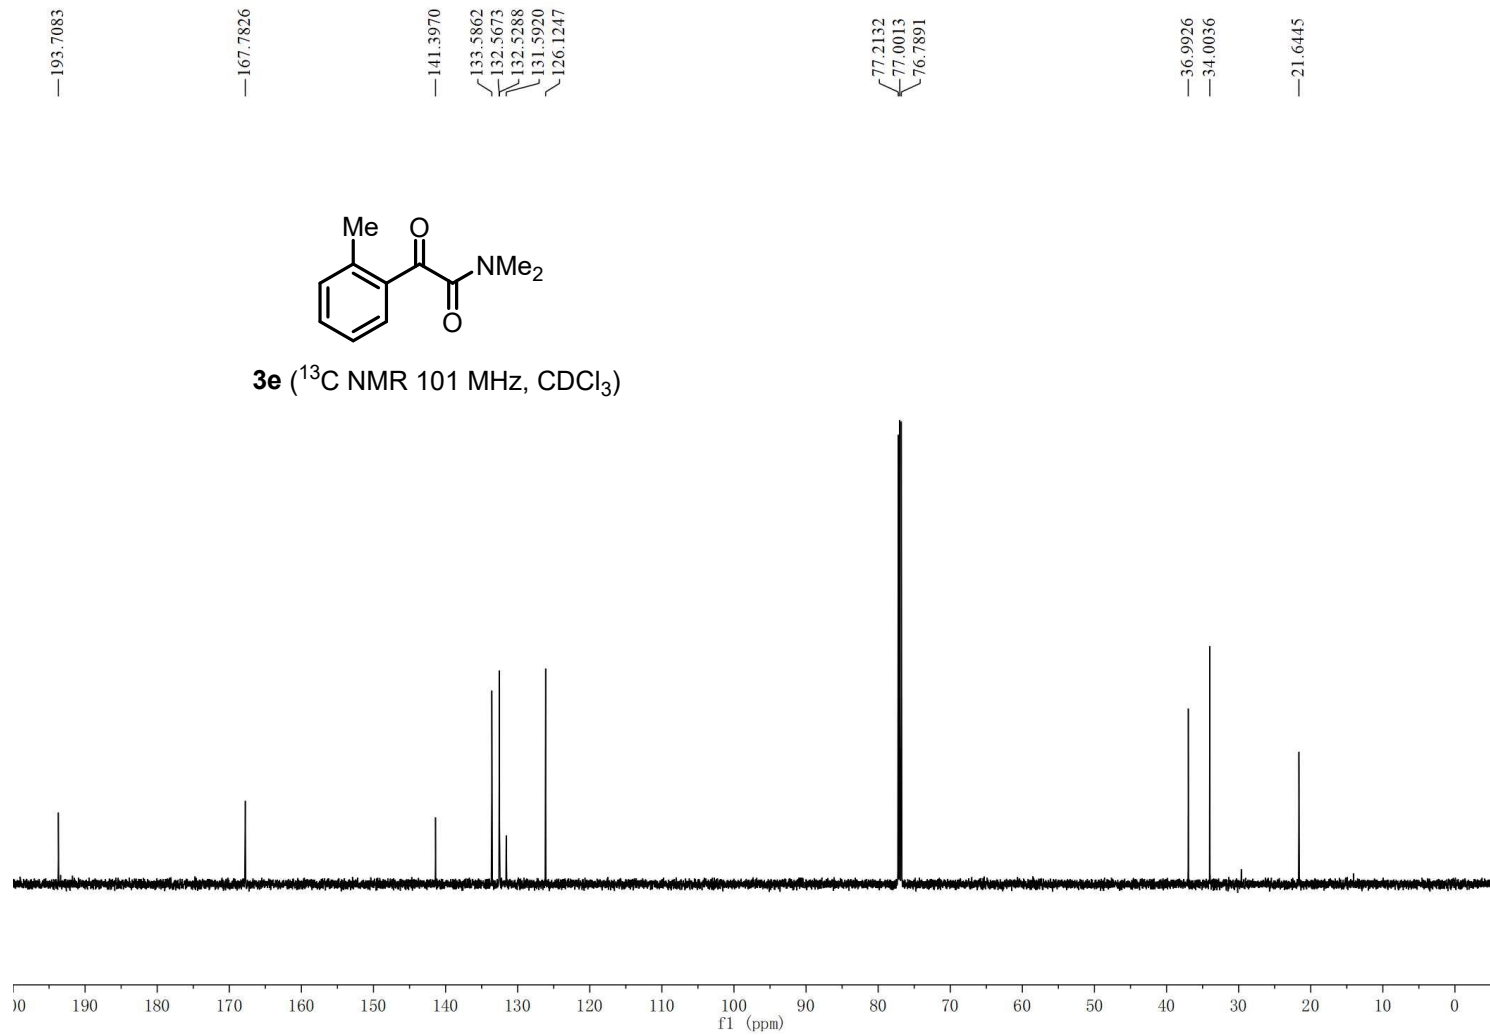

7.8815  
7.8771  
7.8621  
7.8577  
7.5104  
7.5060  
7.4924  
7.4900  
7.4878  
7.4858  
7.4723  
7.4679  
7.4304  
7.4272  
7.4104  
7.4063  
7.4024  
7.3871  
7.3838  
7.3685  
7.3652  
7.2596

3.0816  
3.0773  
3.0634  
3.0590

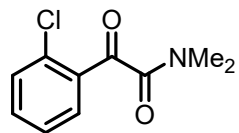

**3f** ( $^1\text{H}$  NMR 400 MHz,  $\text{CDCl}_3$ )

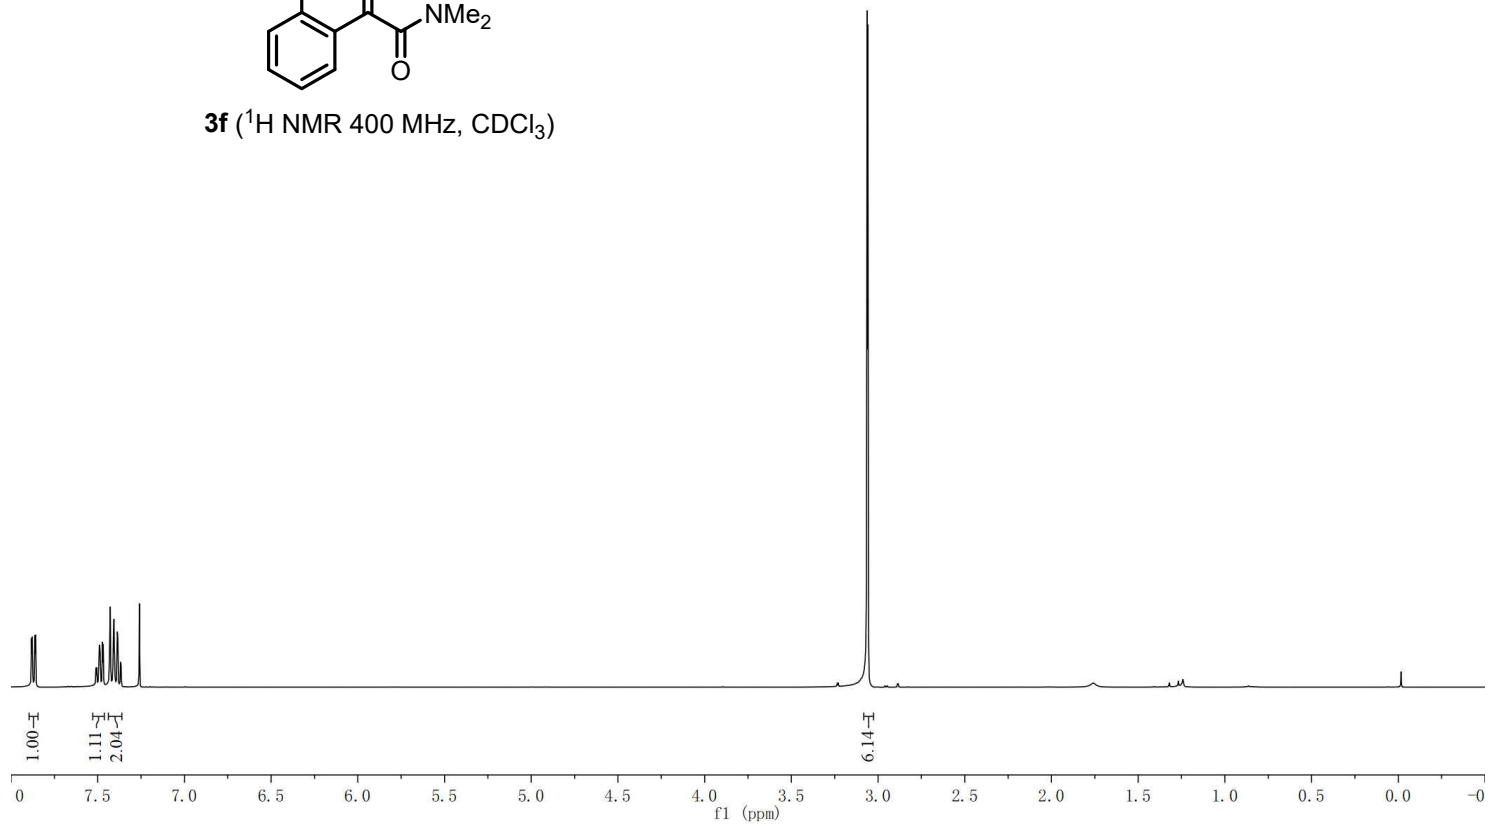

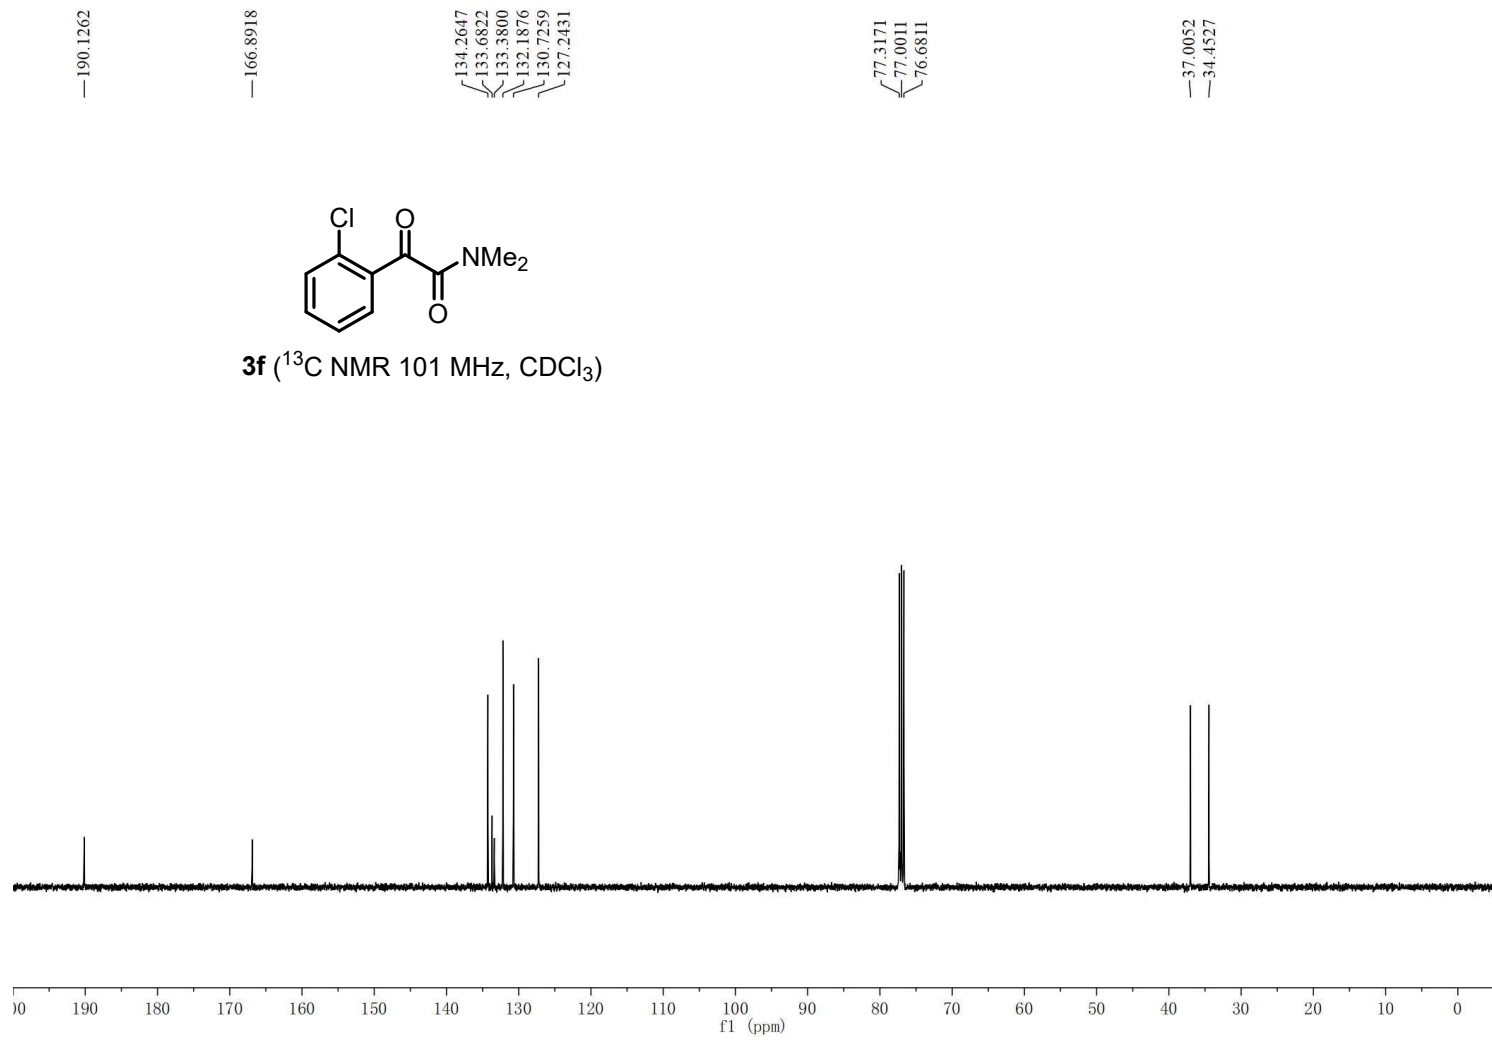

8.0799  
8.0769  
8.0739  
7.8763  
7.8740  
7.8718  
7.8633  
7.8611  
7.8589  
7.7621  
7.7603  
7.7587  
7.7570  
7.7489  
7.7471  
7.7453  
7.7437  
7.3958  
7.3827  
7.3696  
7.2605

3.1136  
2.9606

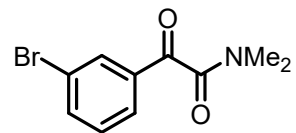

**3g** ( $^1\text{H}$  NMR 400 MHz,  $\text{CDCl}_3$ )

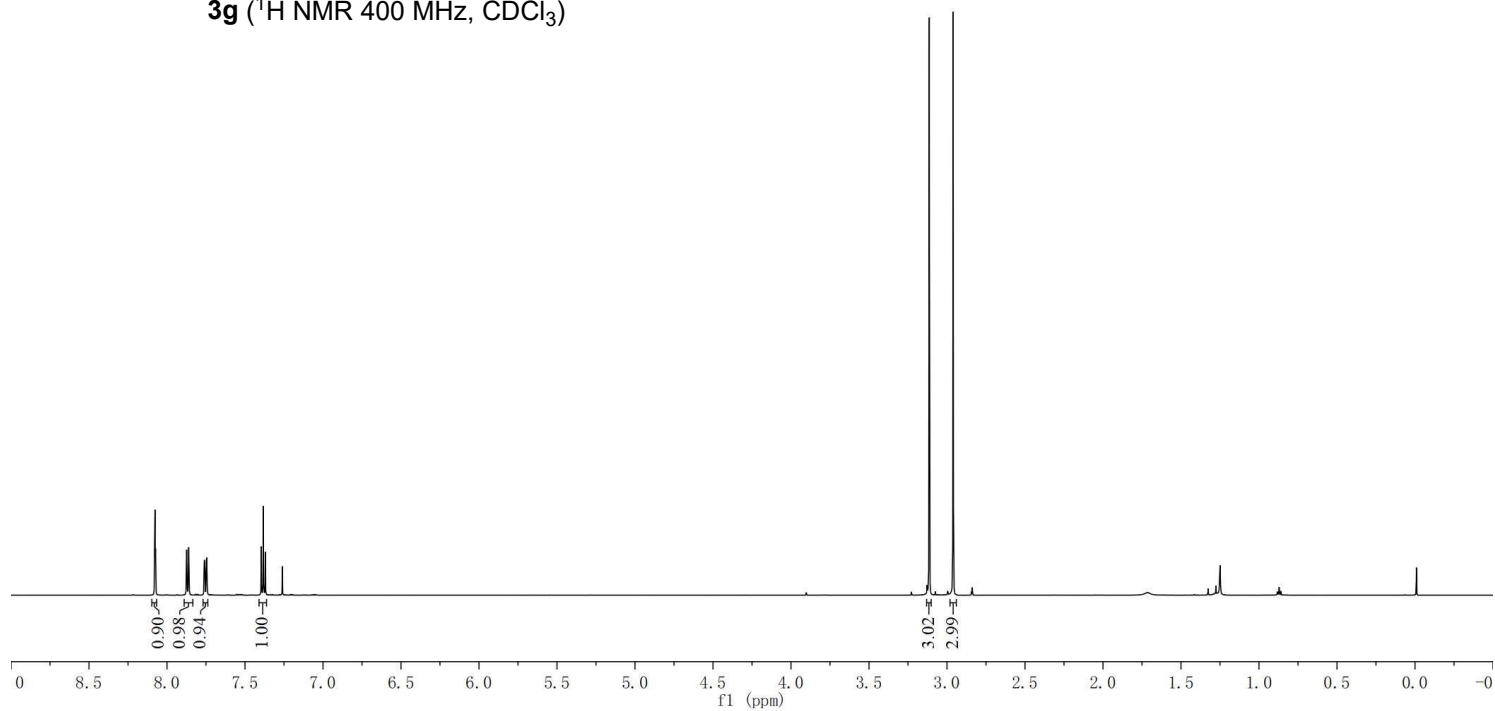

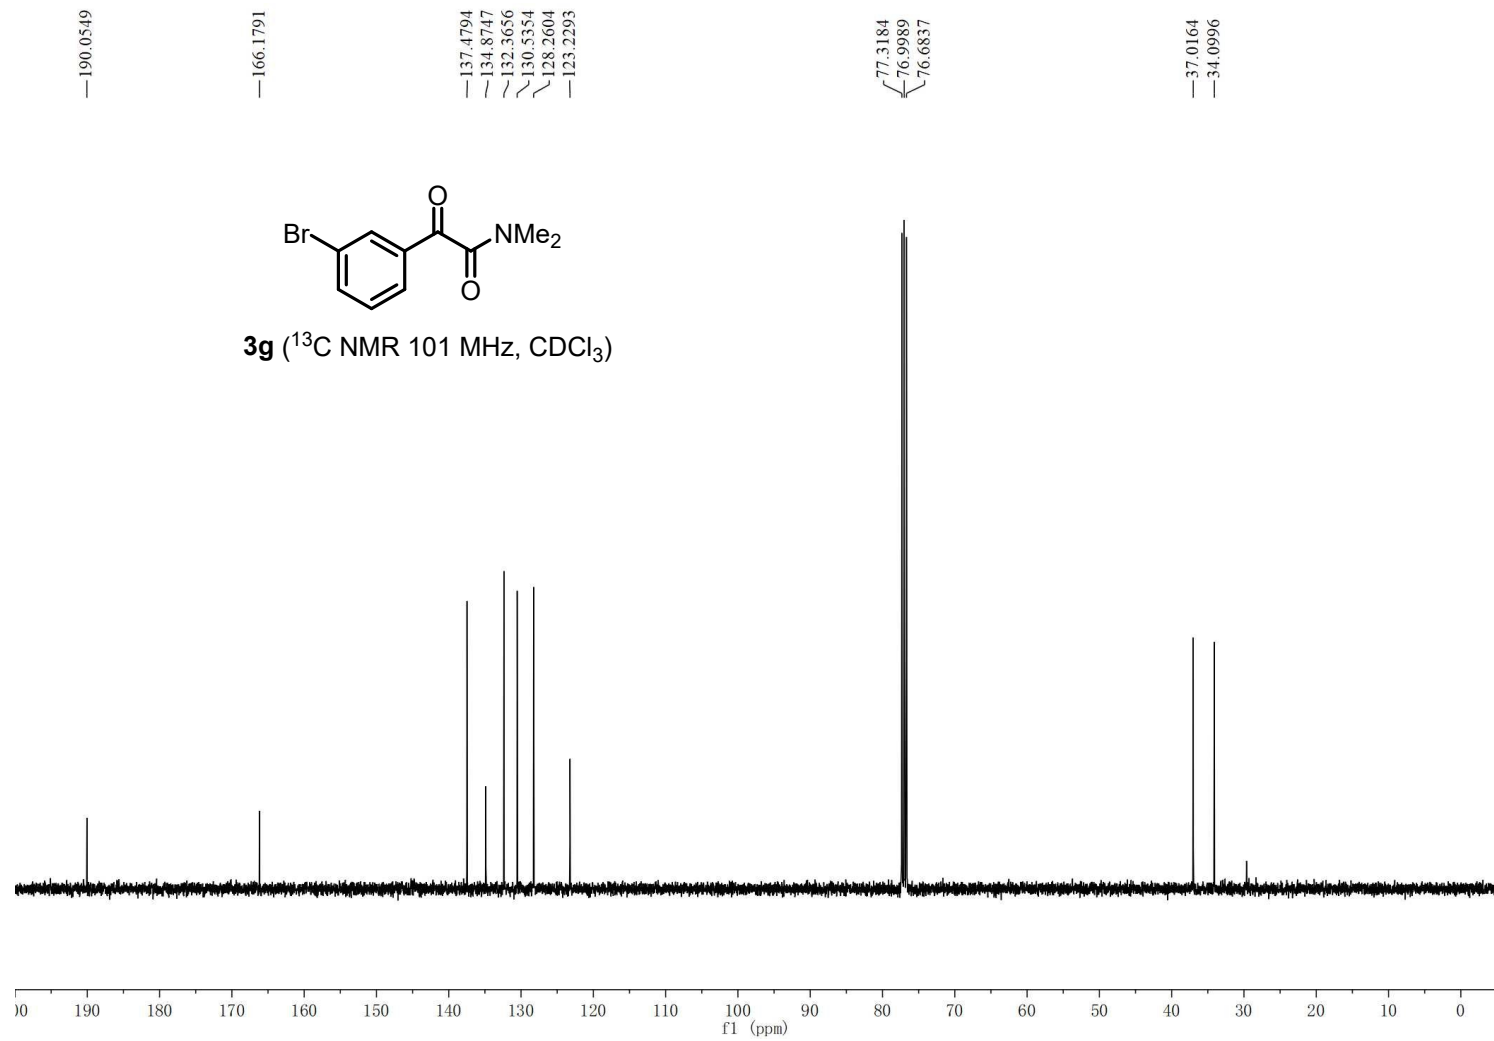

7.4713  
7.4676  
7.4652  
7.4614  
7.4542  
7.4511  
7.4477  
7.4059  
7.4025  
7.3885  
7.3853  
7.3654  
7.2606  
7.1774  
7.1736  
7.1714  
7.1678  
7.1568  
7.1541  
7.1501  
7.1474

— 3.8388

— 3.0903  
— 2.9320

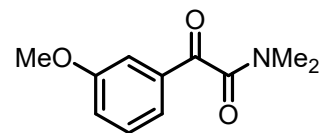

**3h** ( $^1\text{H}$  NMR 400 MHz,  $\text{CDCl}_3$ )

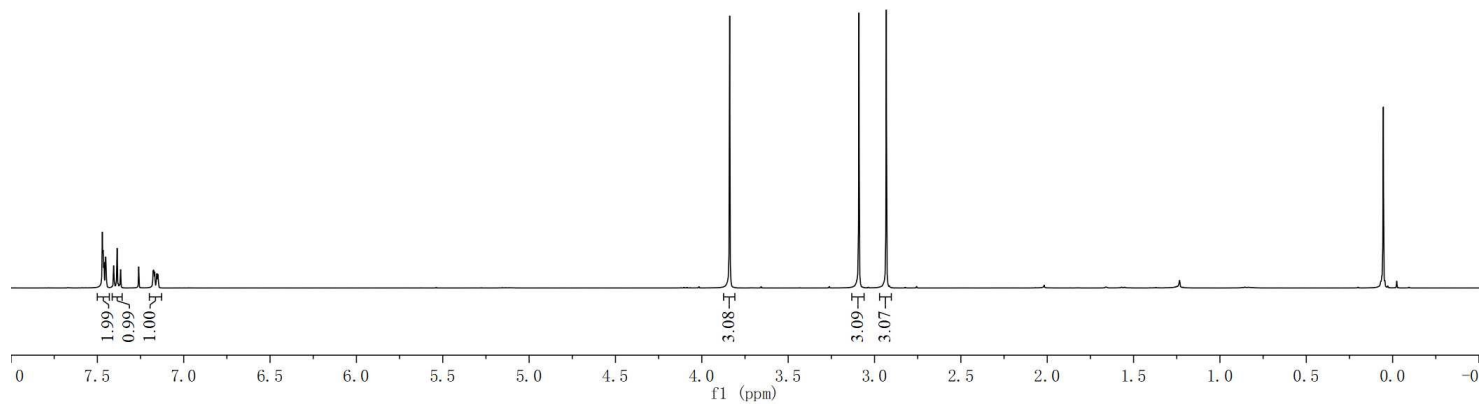

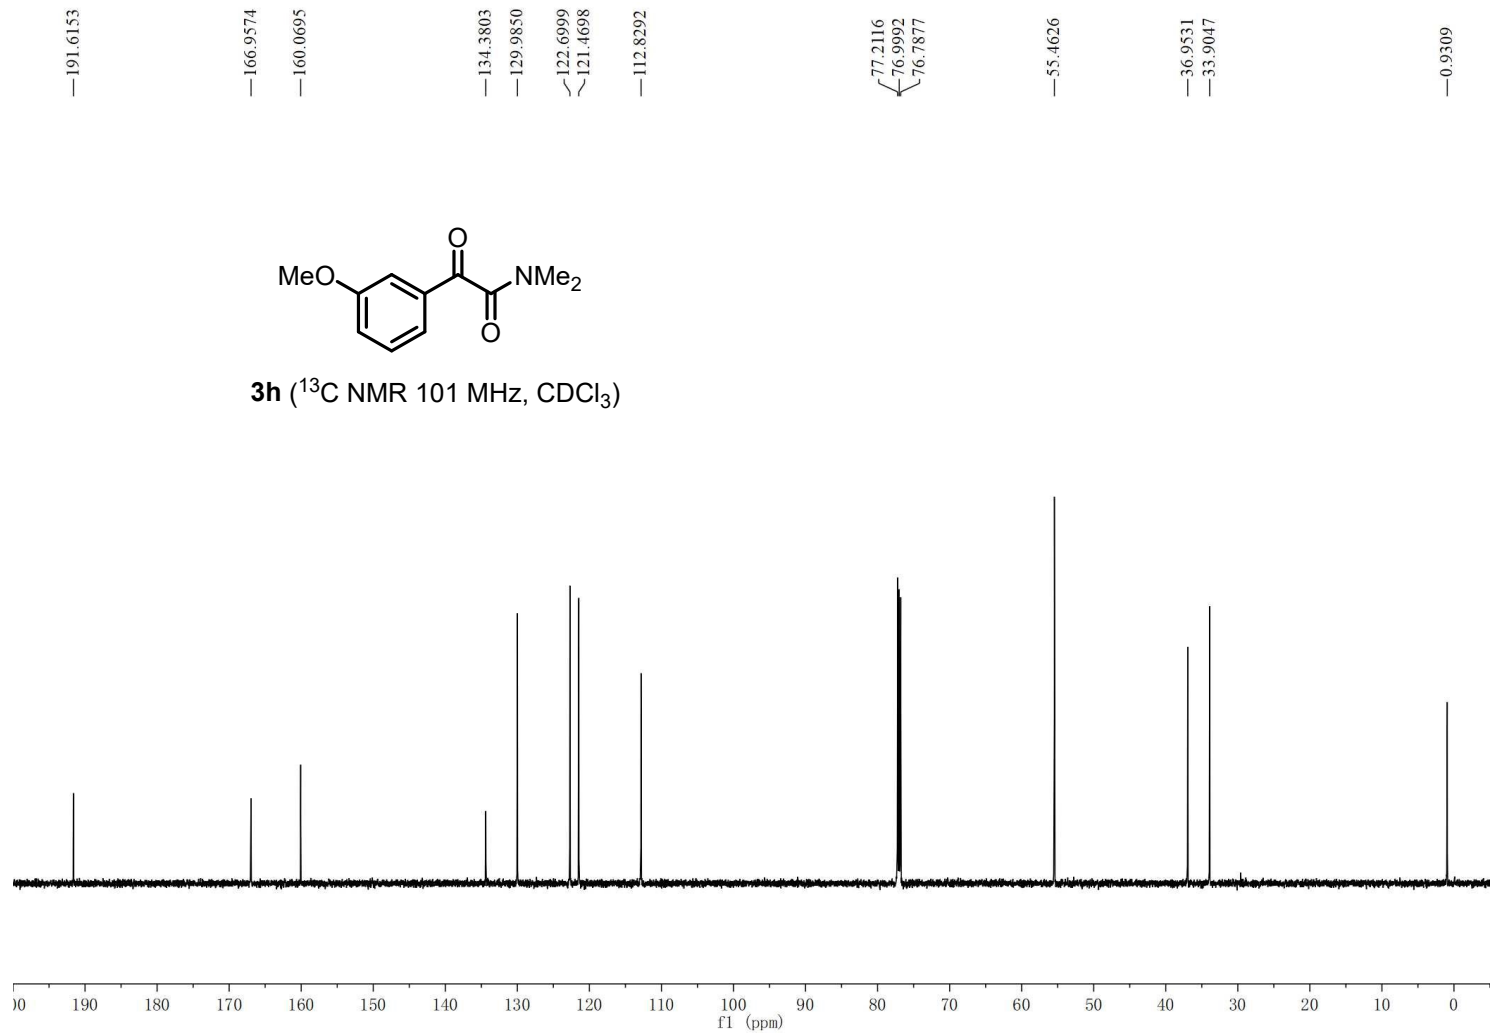

8.0751  
8.0617  
7.7716  
7.7683  
7.7574  
7.7542  
— 7.2599

3.1274  
3.1237  
2.9746  
2.9713

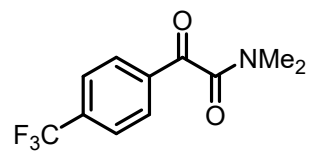

**3i** ( $^1\text{H}$  NMR 400 MHz,  $\text{CDCl}_3$ )

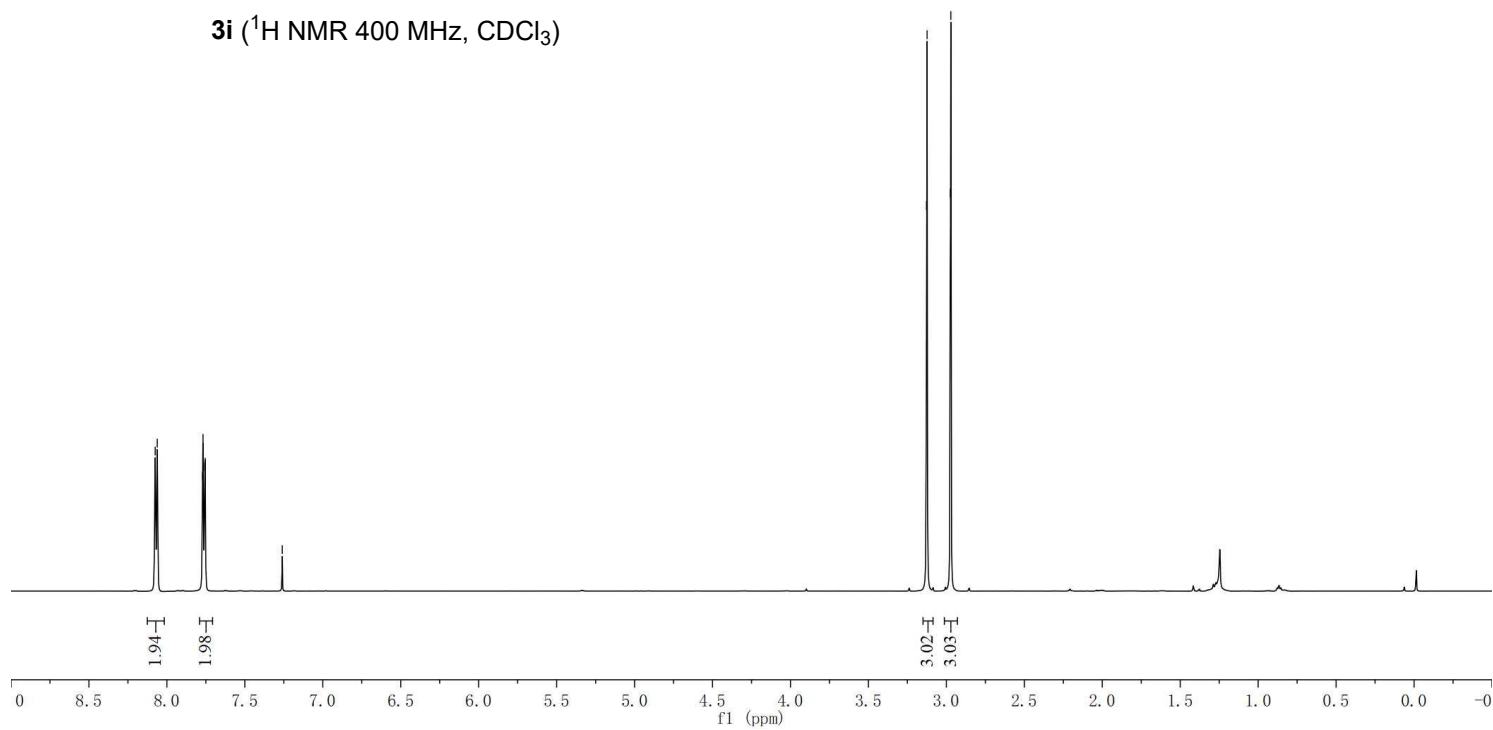



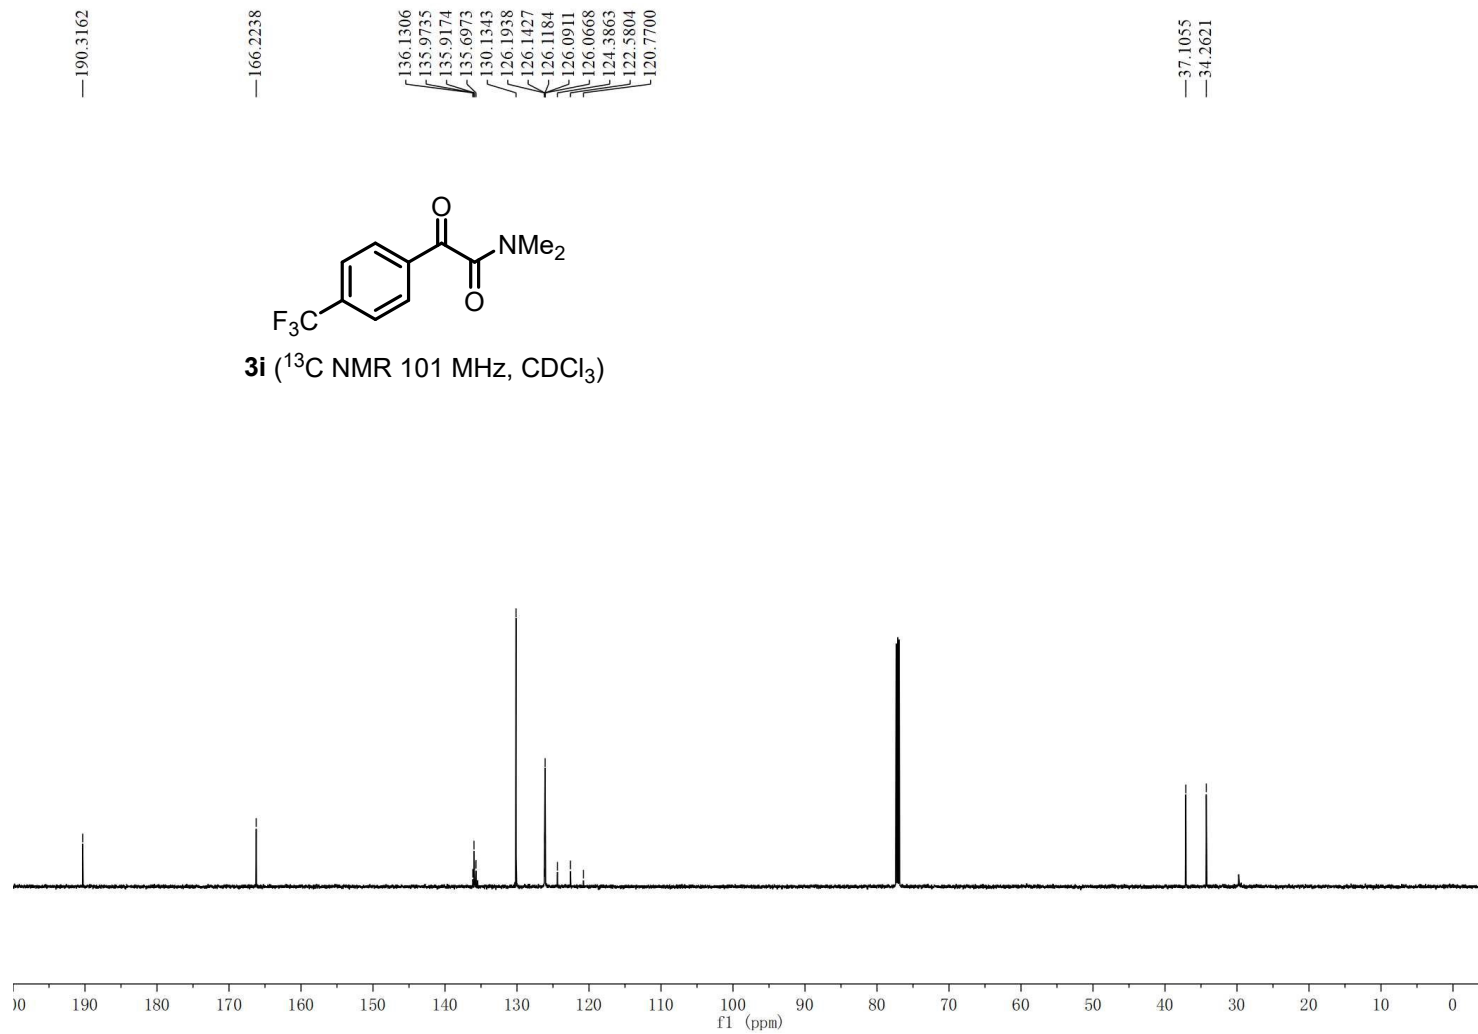

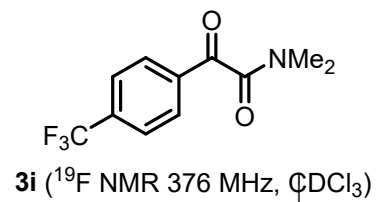

— -63.3500

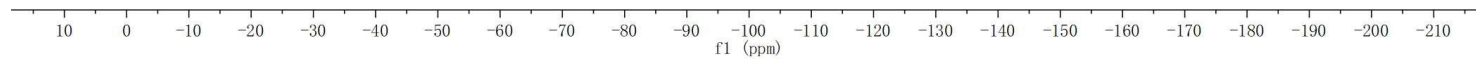

7.8072  
7.8050  
7.7981  
7.7950  
7.7917  
7.7850  
7.7817  
7.7778  
7.7754  
7.7707  
7.6622  
7.6570  
7.6554  
7.6527  
7.6497  
7.6466  
7.6396  
7.2596

3.0858  
3.0686

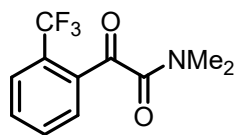

**3j** ( $^1\text{H}$  NMR 400 MHz,  $\text{CDCl}_3$ )

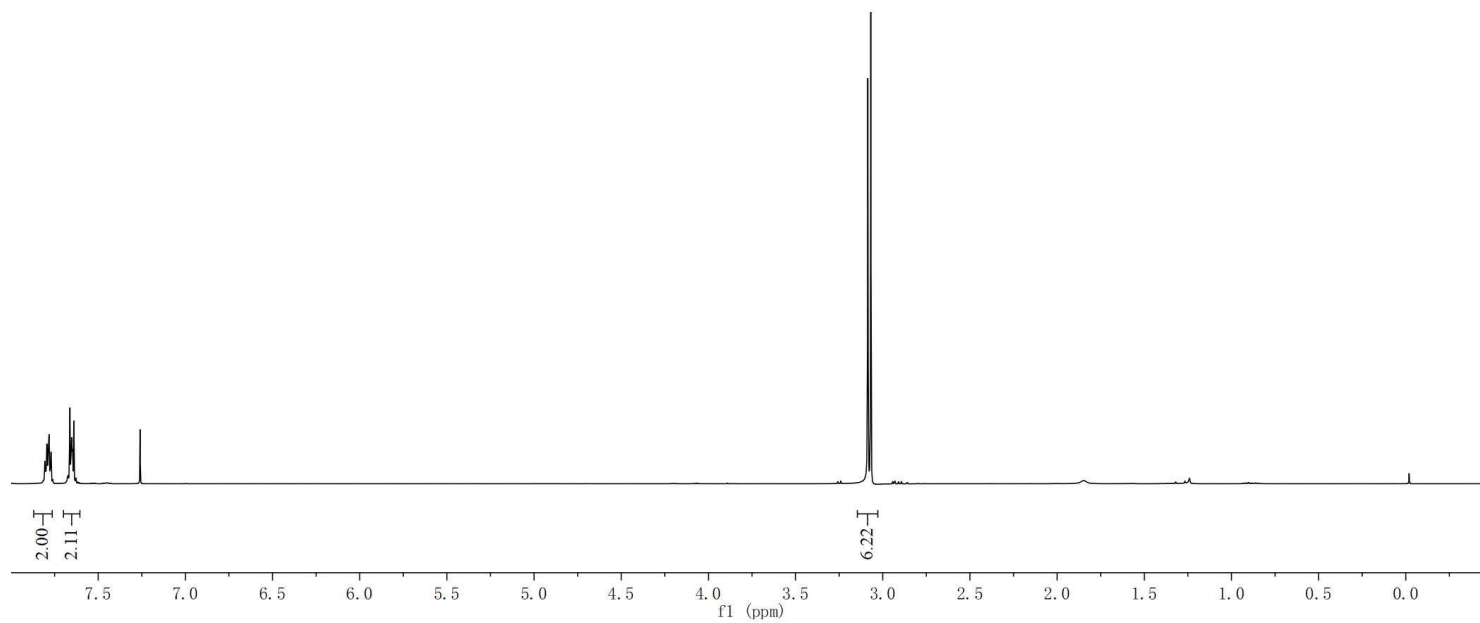

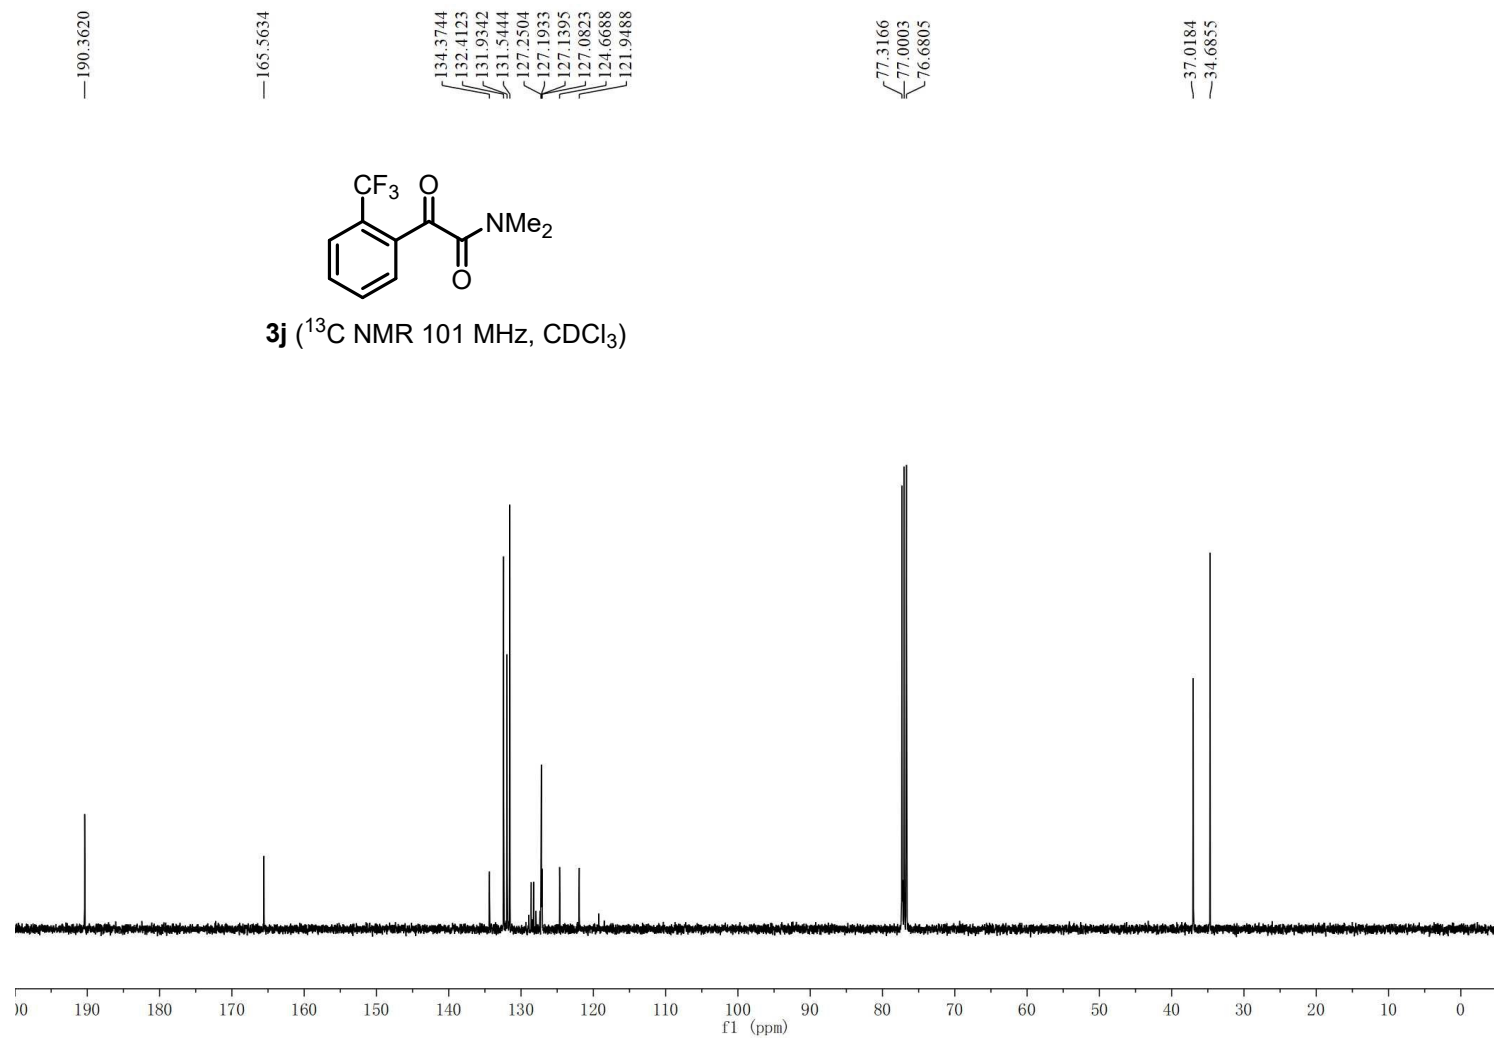

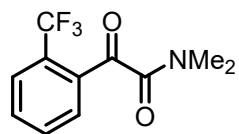

**3j** ( $^{19}\text{F}$  NMR 376 MHz,  $\text{CDCl}_3$ )

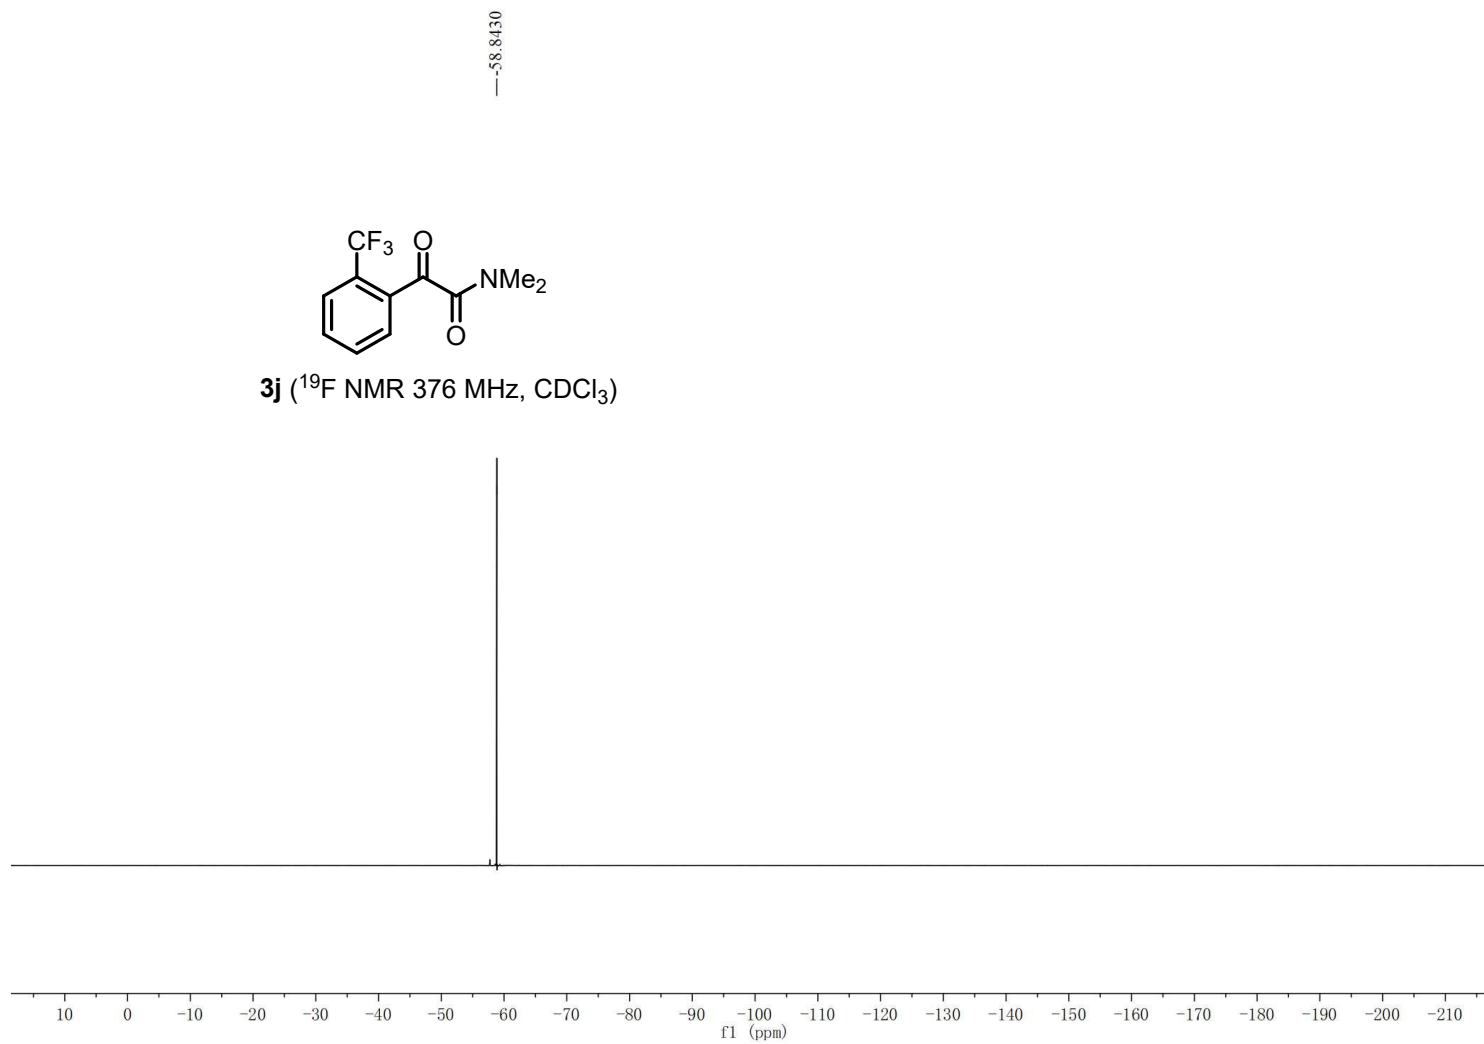

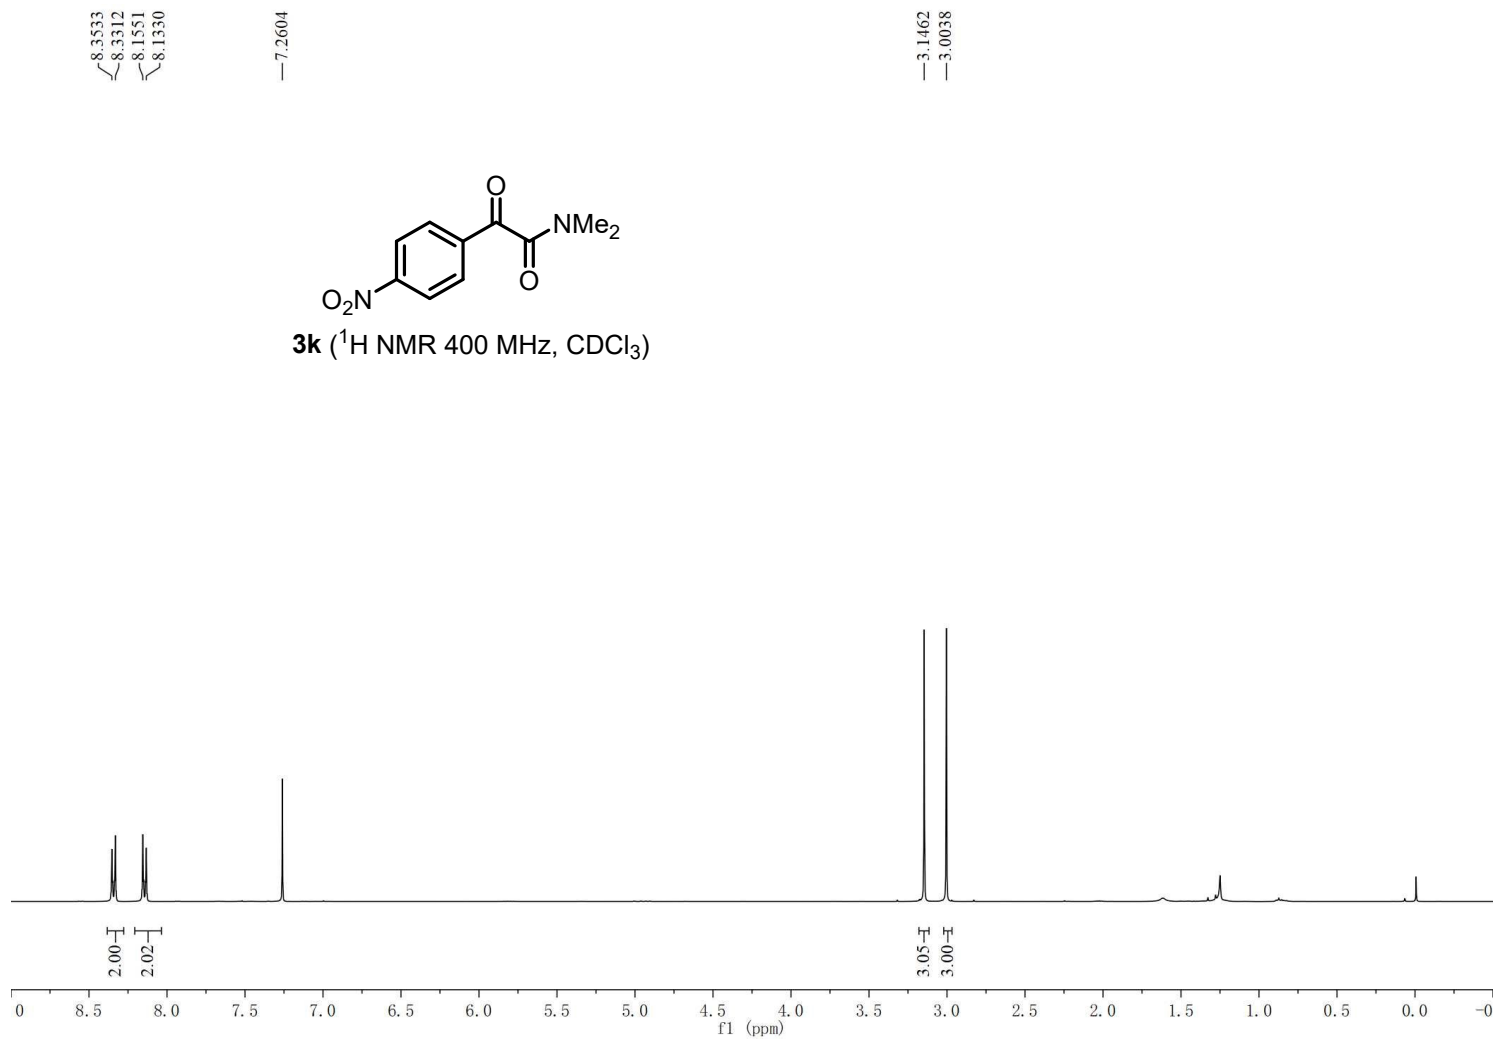

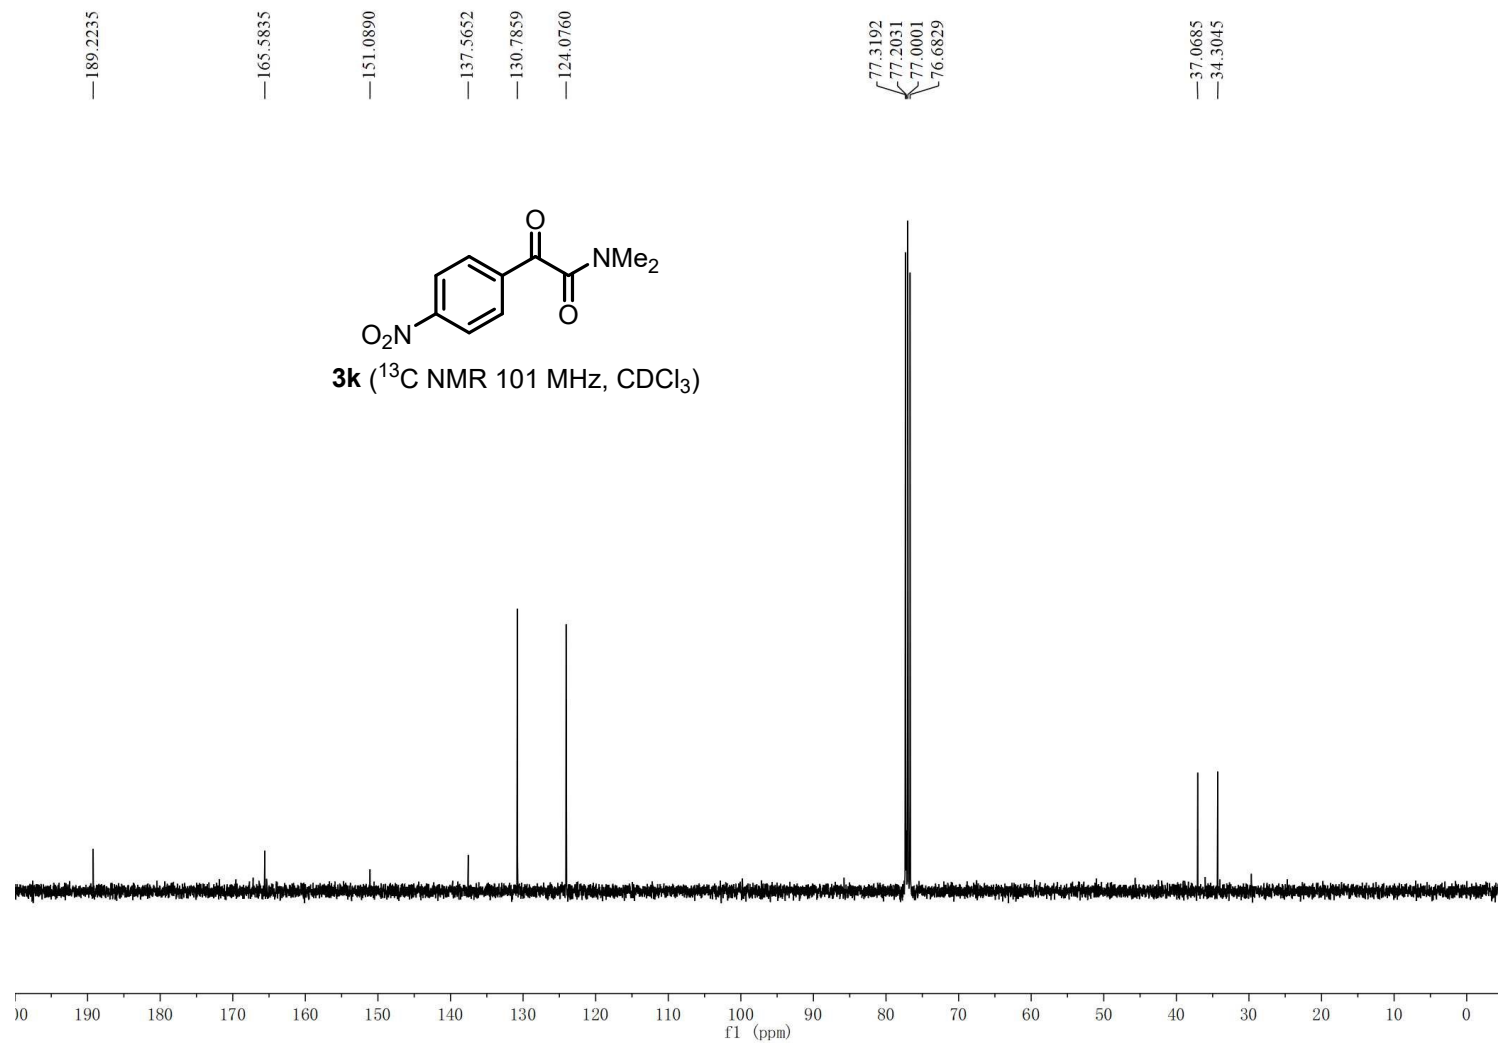

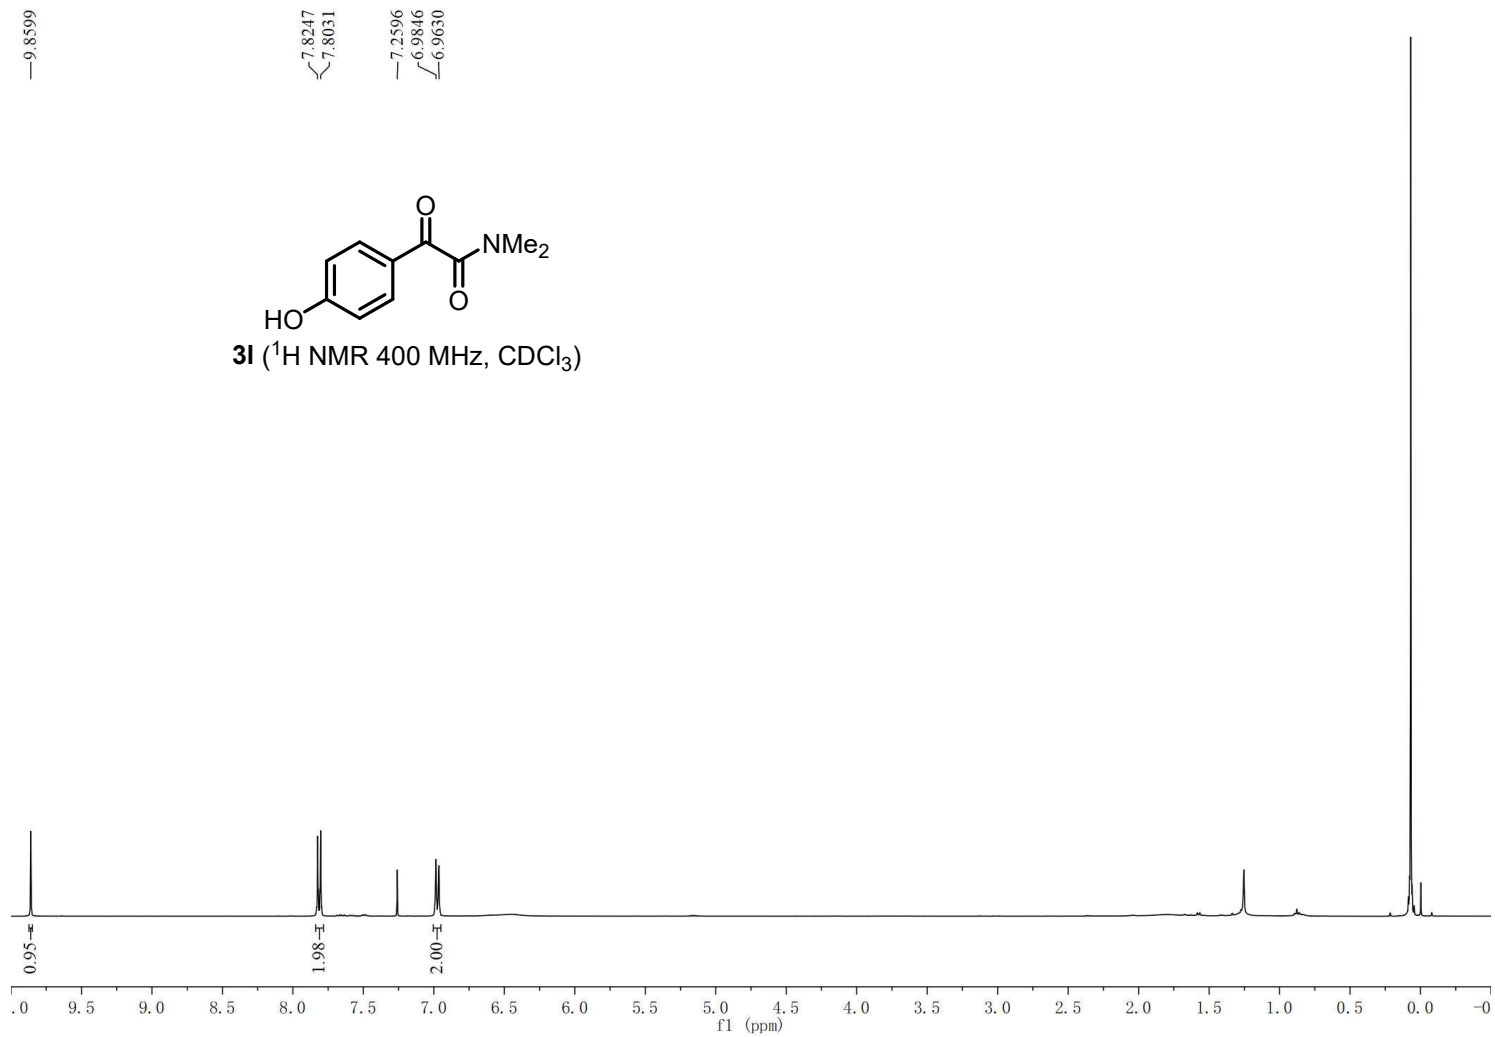



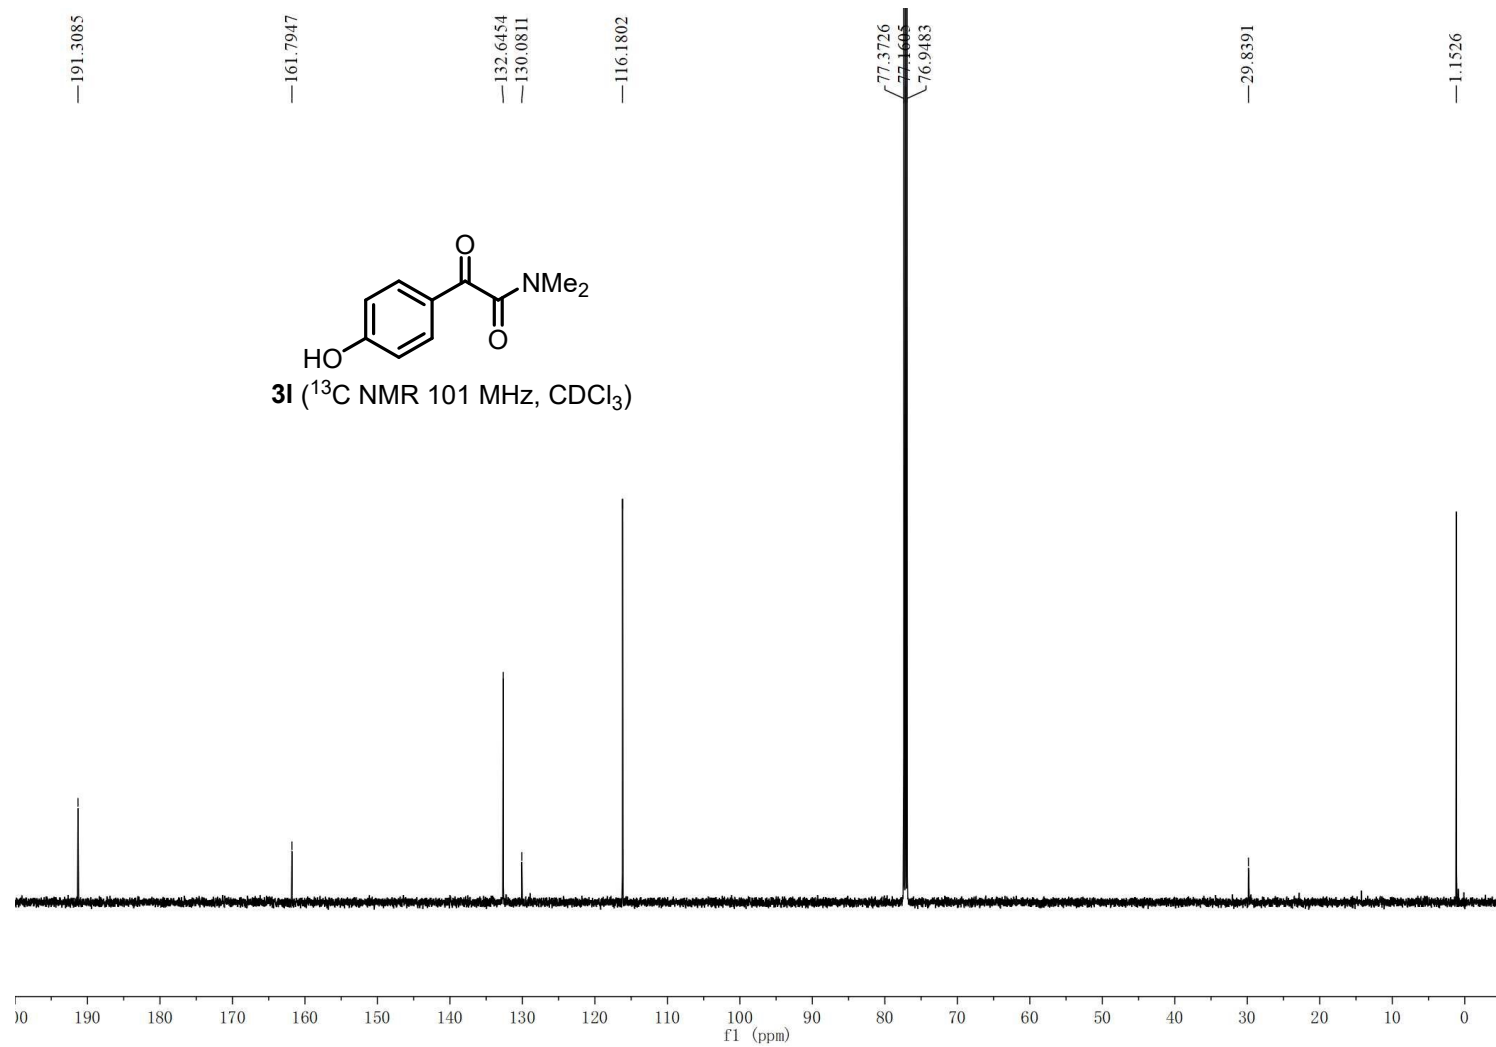

7.4235  
7.4208  
7.4101  
7.4074  
7.3172  
7.3146  
7.3056  
7.3030  
7.3004  
7.2916  
7.2889  
7.2596  
6.6803  
6.6663  
6.6547  
6.6529  
6.6431  
6.6413  
6.6392  
6.6294  
6.6275

3.1317  
3.1064  
3.0950  
2.9487

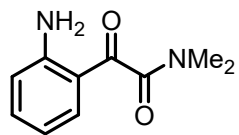

**3m** ( $^1\text{H}$  NMR 400 MHz,  $\text{CDCl}_3$ )

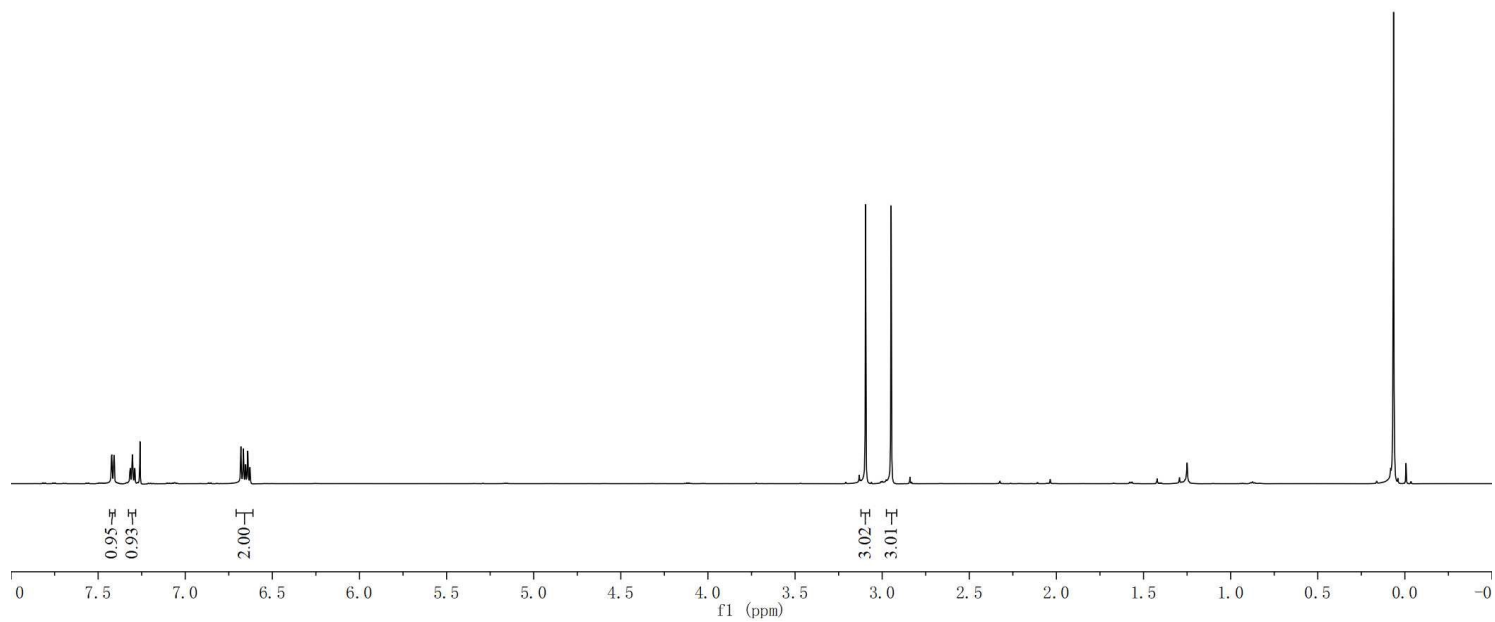

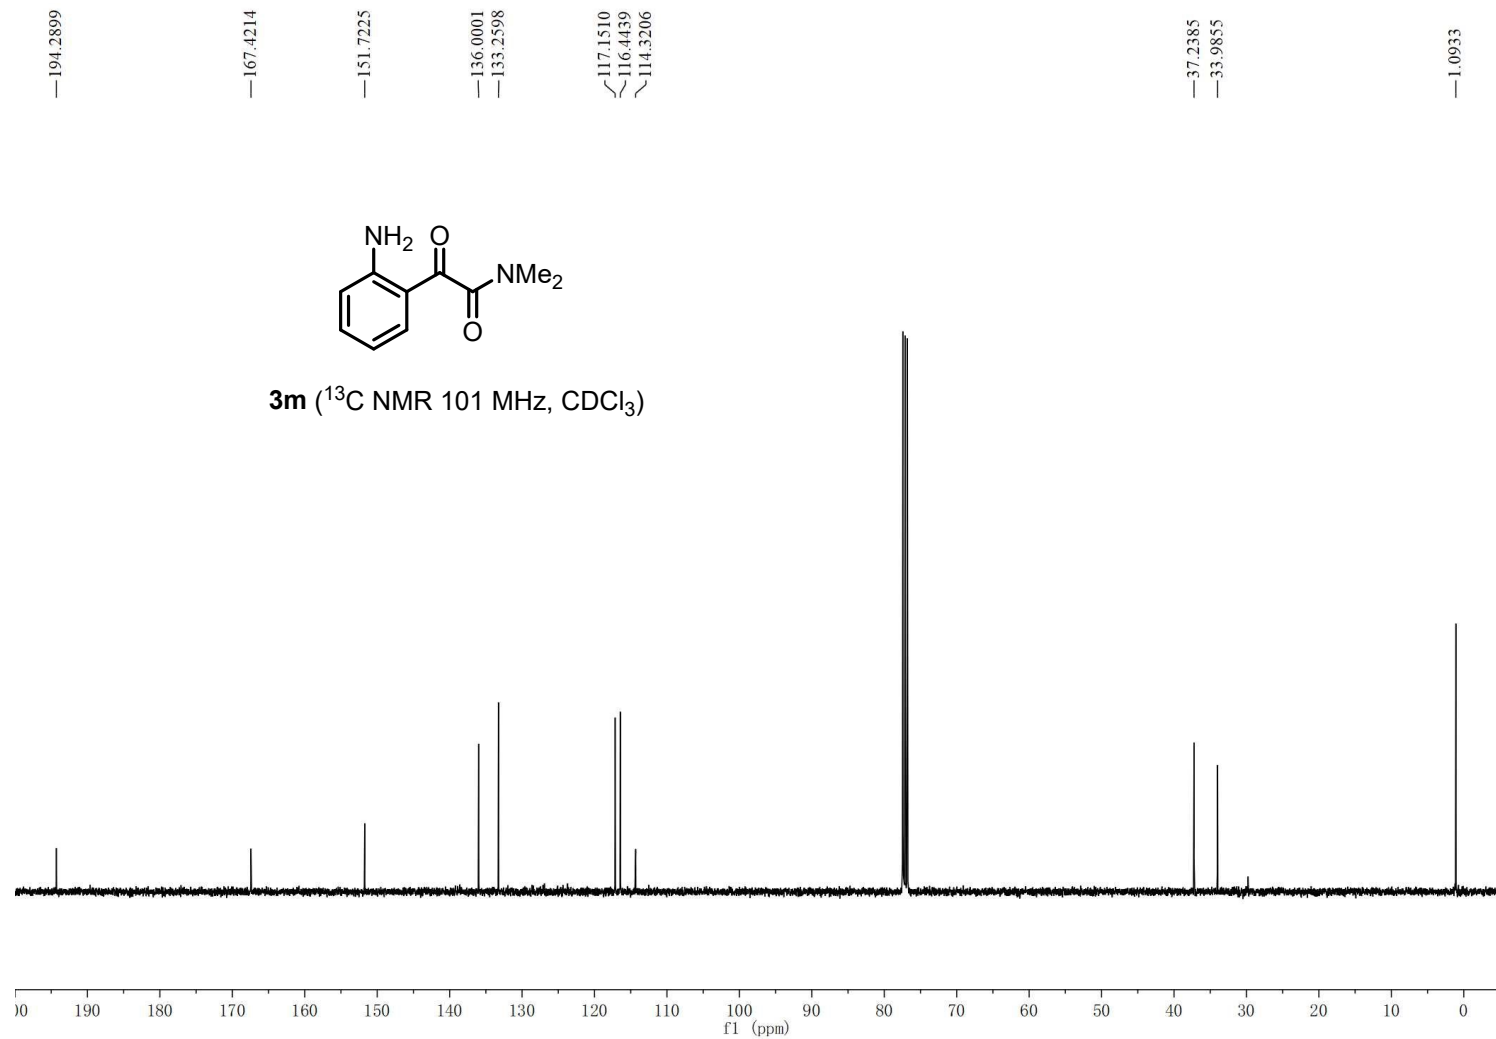

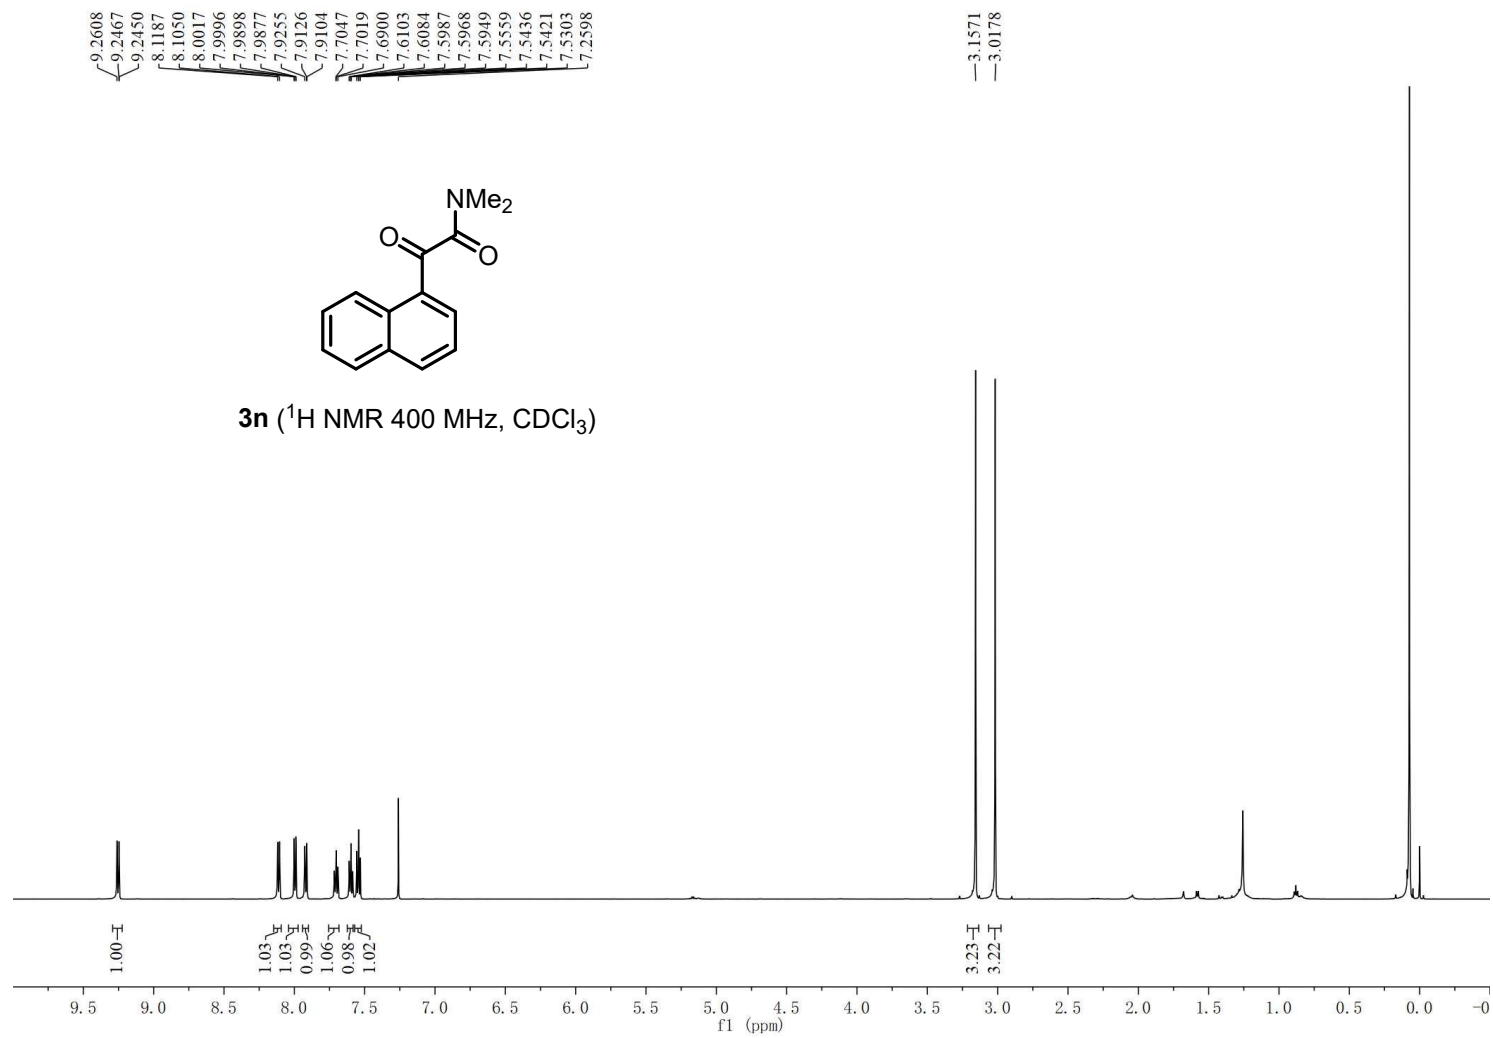

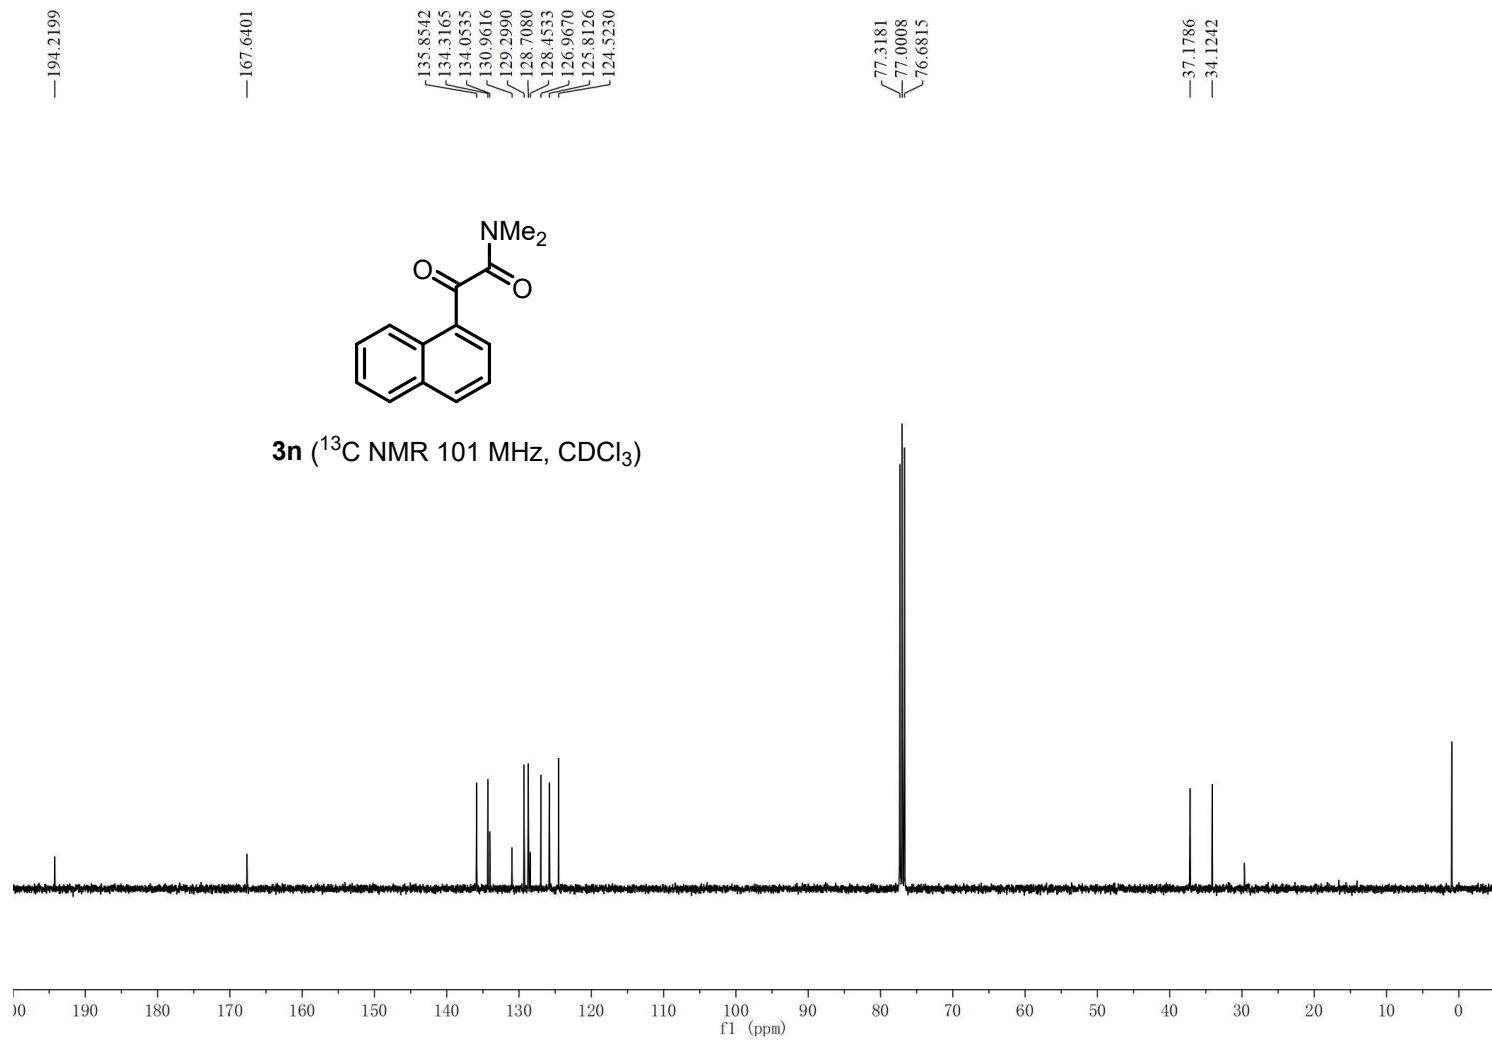

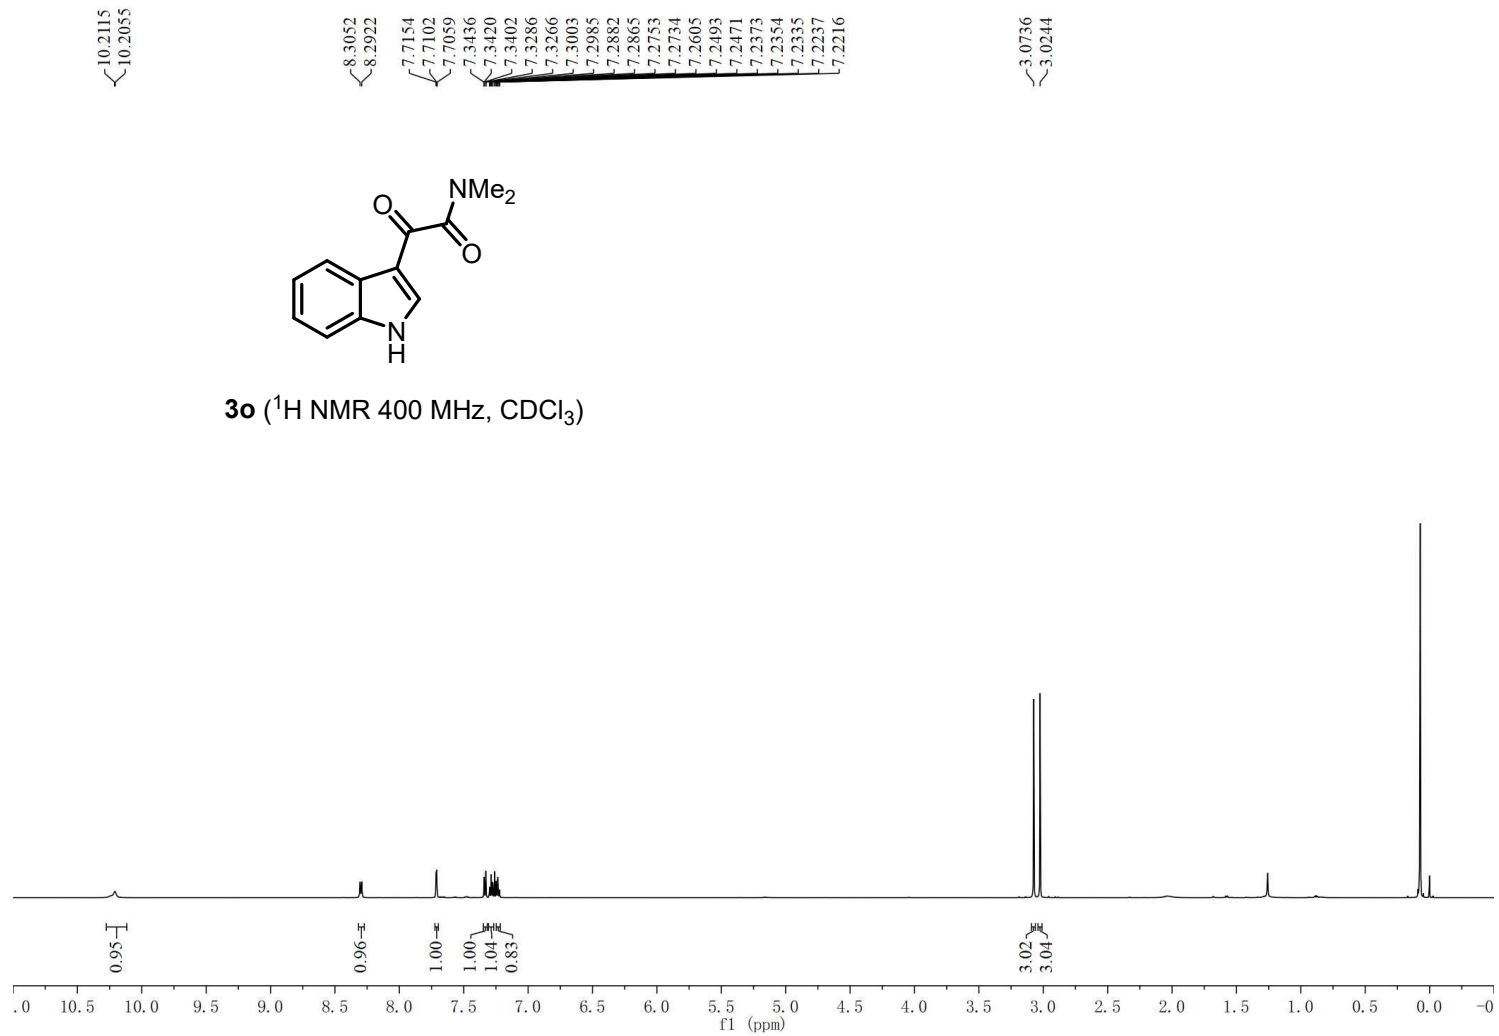

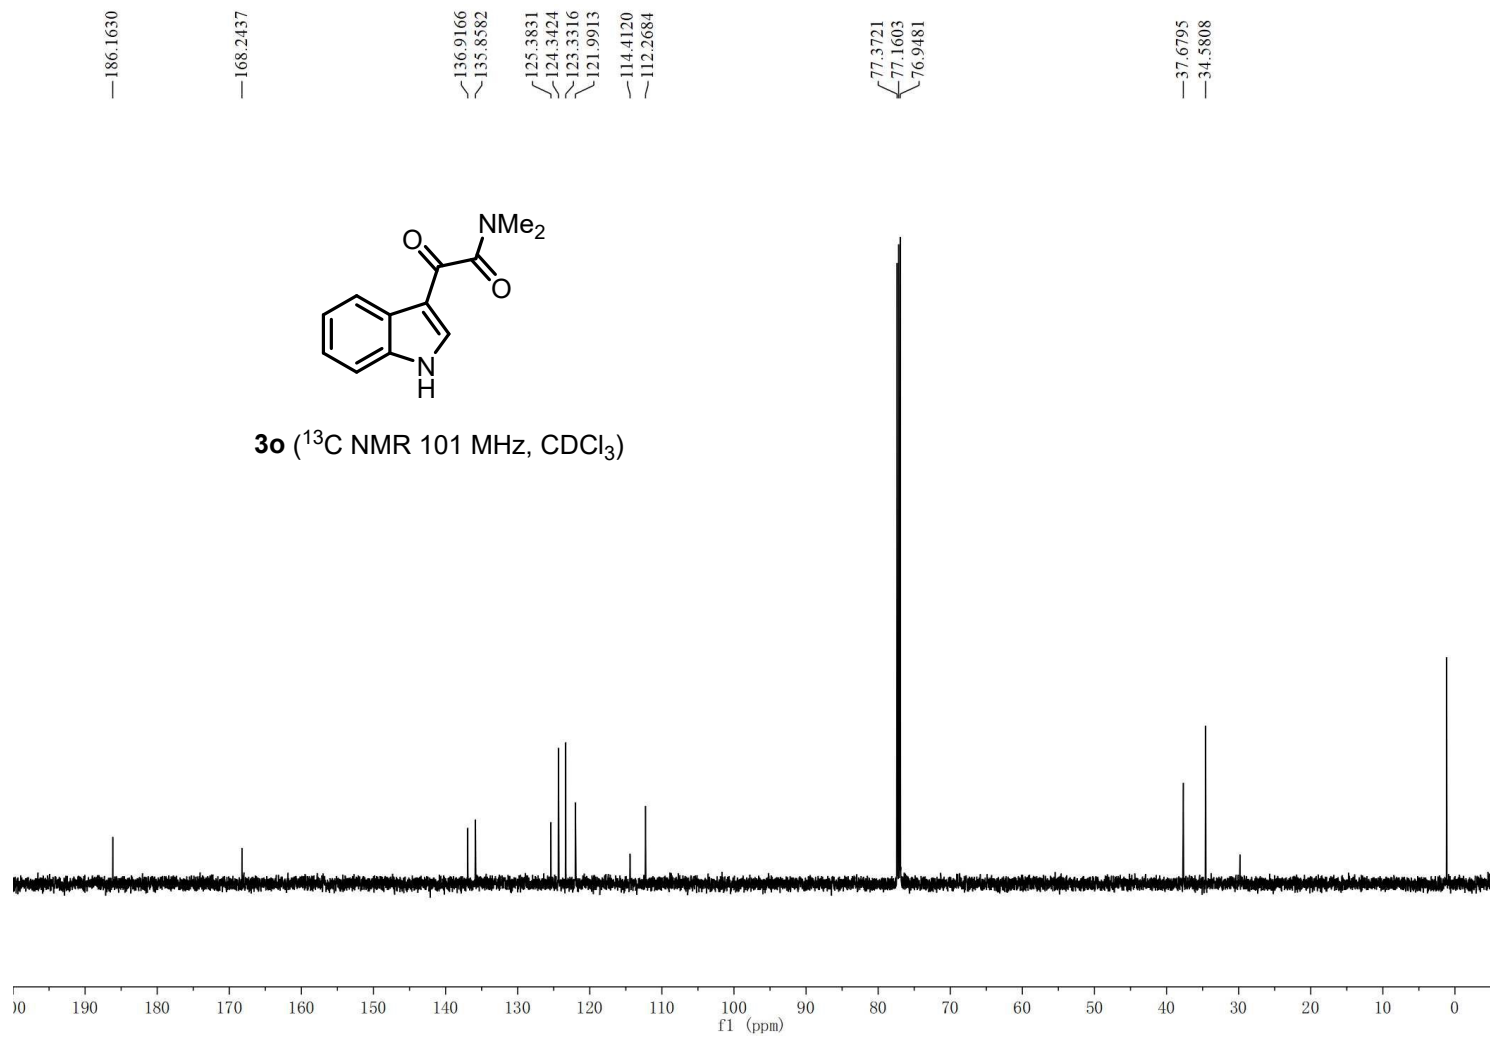

7.8141  
7.8113  
7.8046  
7.8016  
7.7879  
7.7850  
7.7757  
7.7728  
7.7599  
7.1827  
7.1730  
7.1704  
7.1608

3.0910  
3.0339

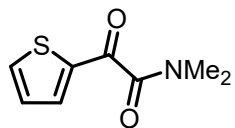

**3p** ( $^1\text{H}$  NMR 400 MHz,  $\text{CDCl}_3$ )

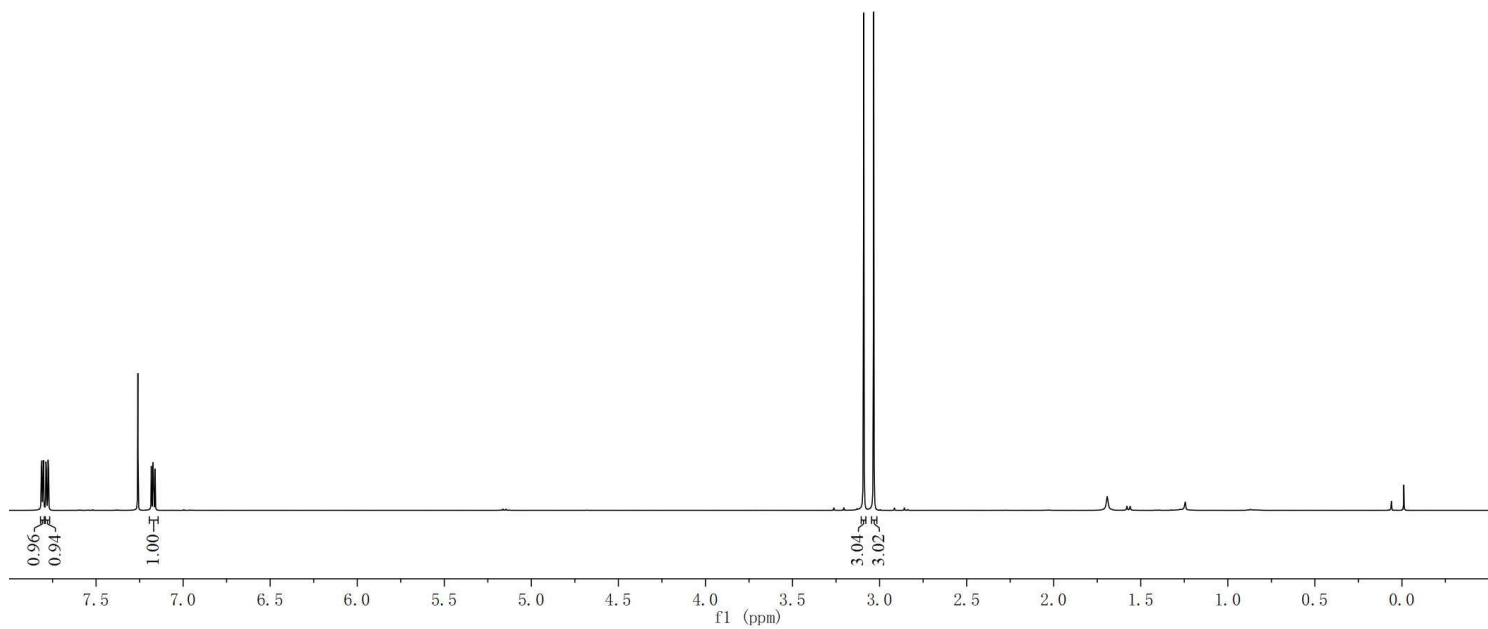



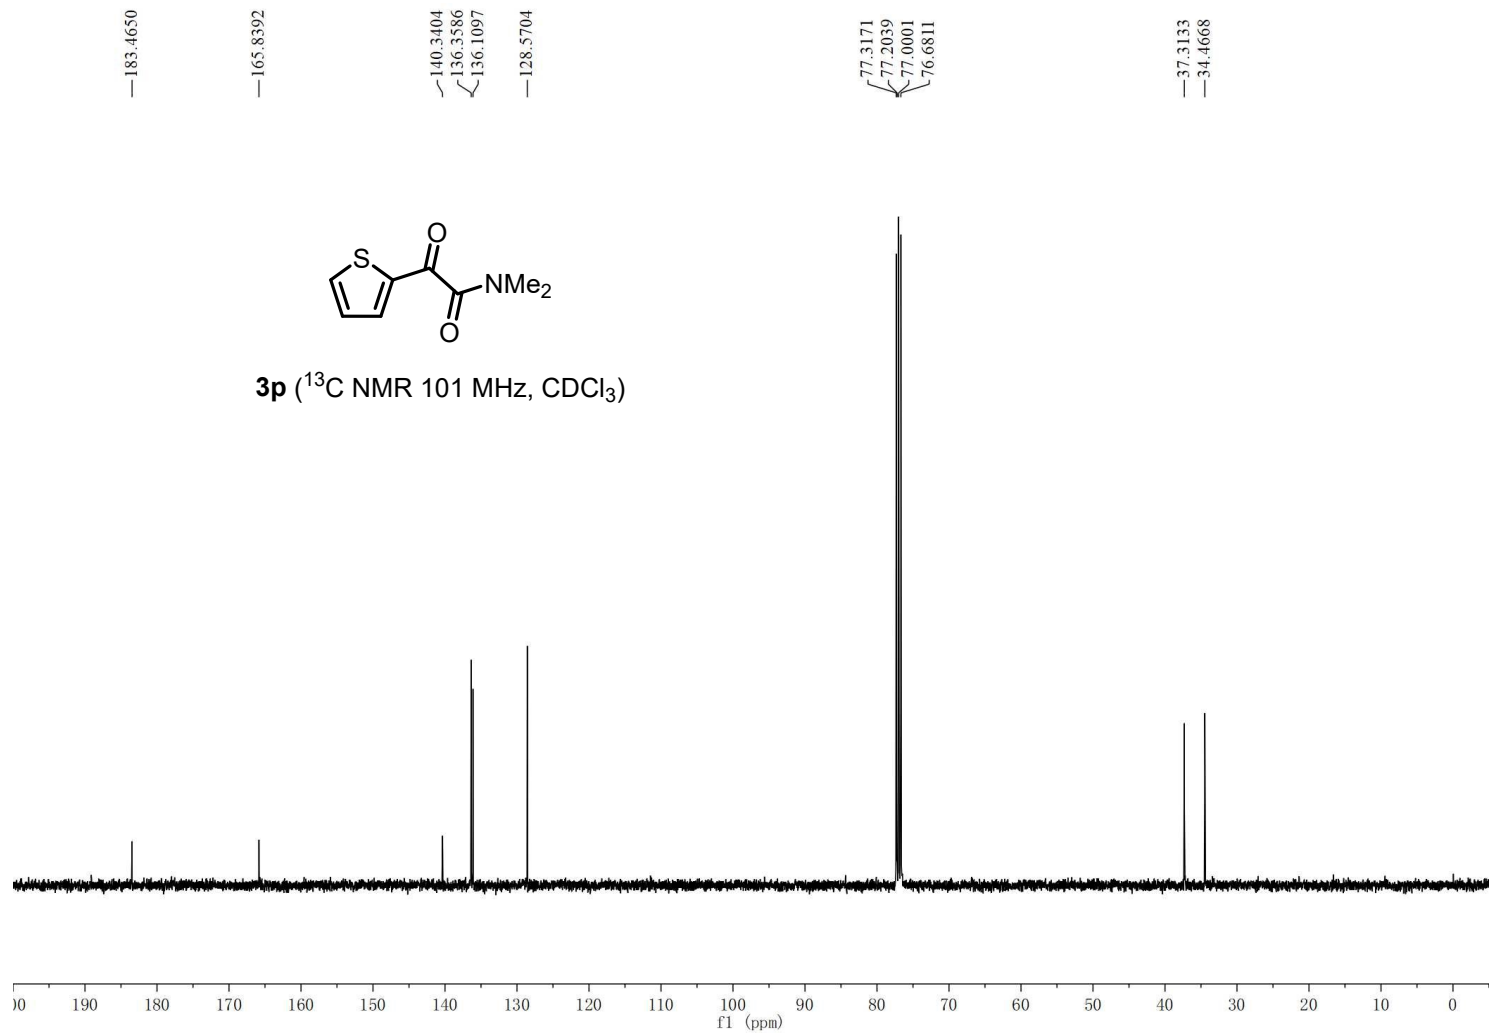

7.7026  
7.7002  
7.6983  
7.5610  
7.5537  
7.5518  
7.2603  
6.6012  
6.5970  
6.5921  
6.5880

3.0701  
3.0227

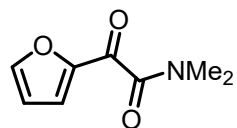

**3q** ( $^1\text{H}$  NMR 400 MHz,  $\text{CDCl}_3$ )

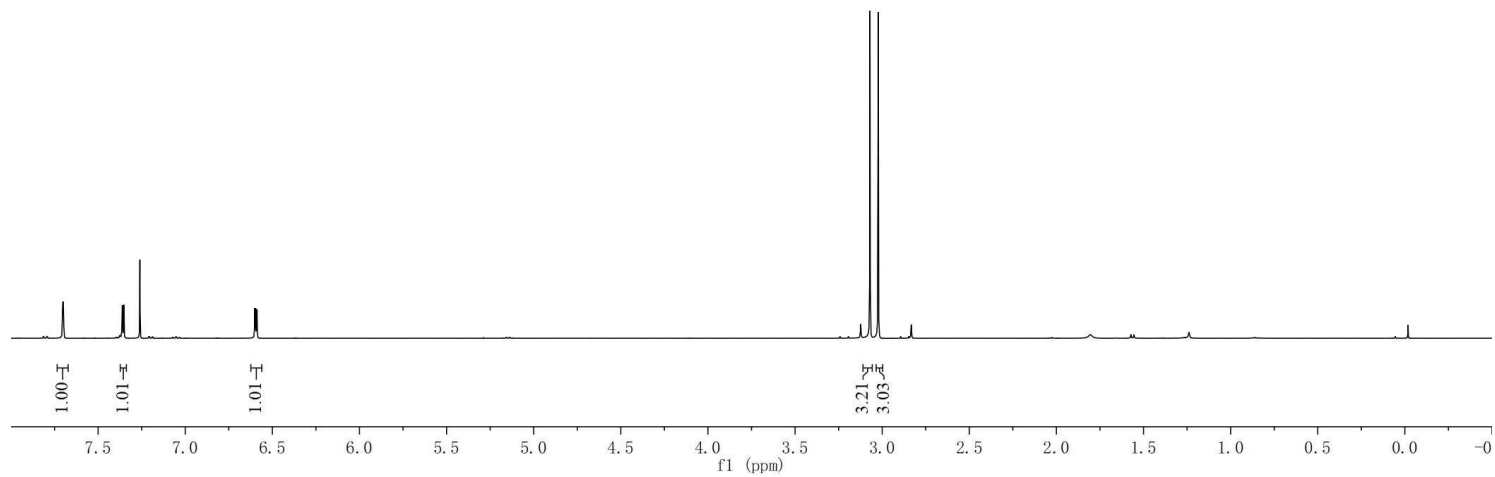

— 178.4713  
 — 165.3996  
 — 150.2298  
 — 148.6416  
 — 122.2498  
 — 112.7975  
 — 77.2116  
 — 77.0001  
 — 76.7877  
 — 37.1534  
 — 34.4783

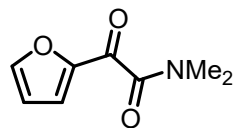

**3q** ( $^{13}\text{C}$  NMR 101 MHz,  $\text{CDCl}_3$ )

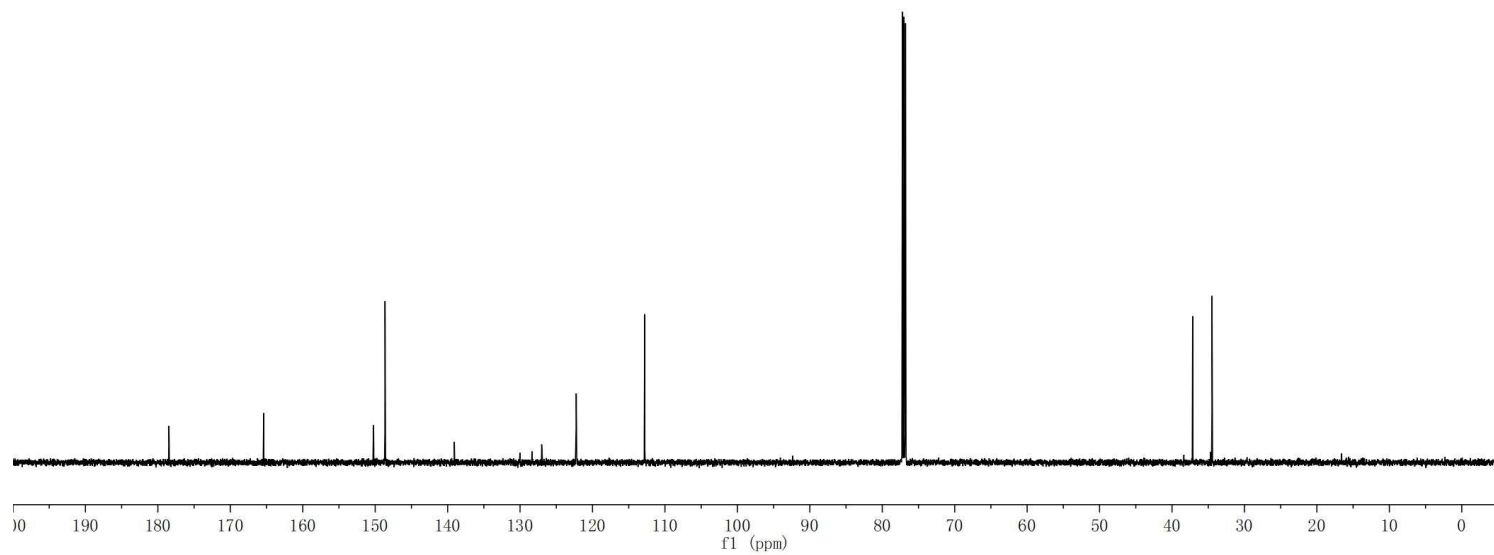

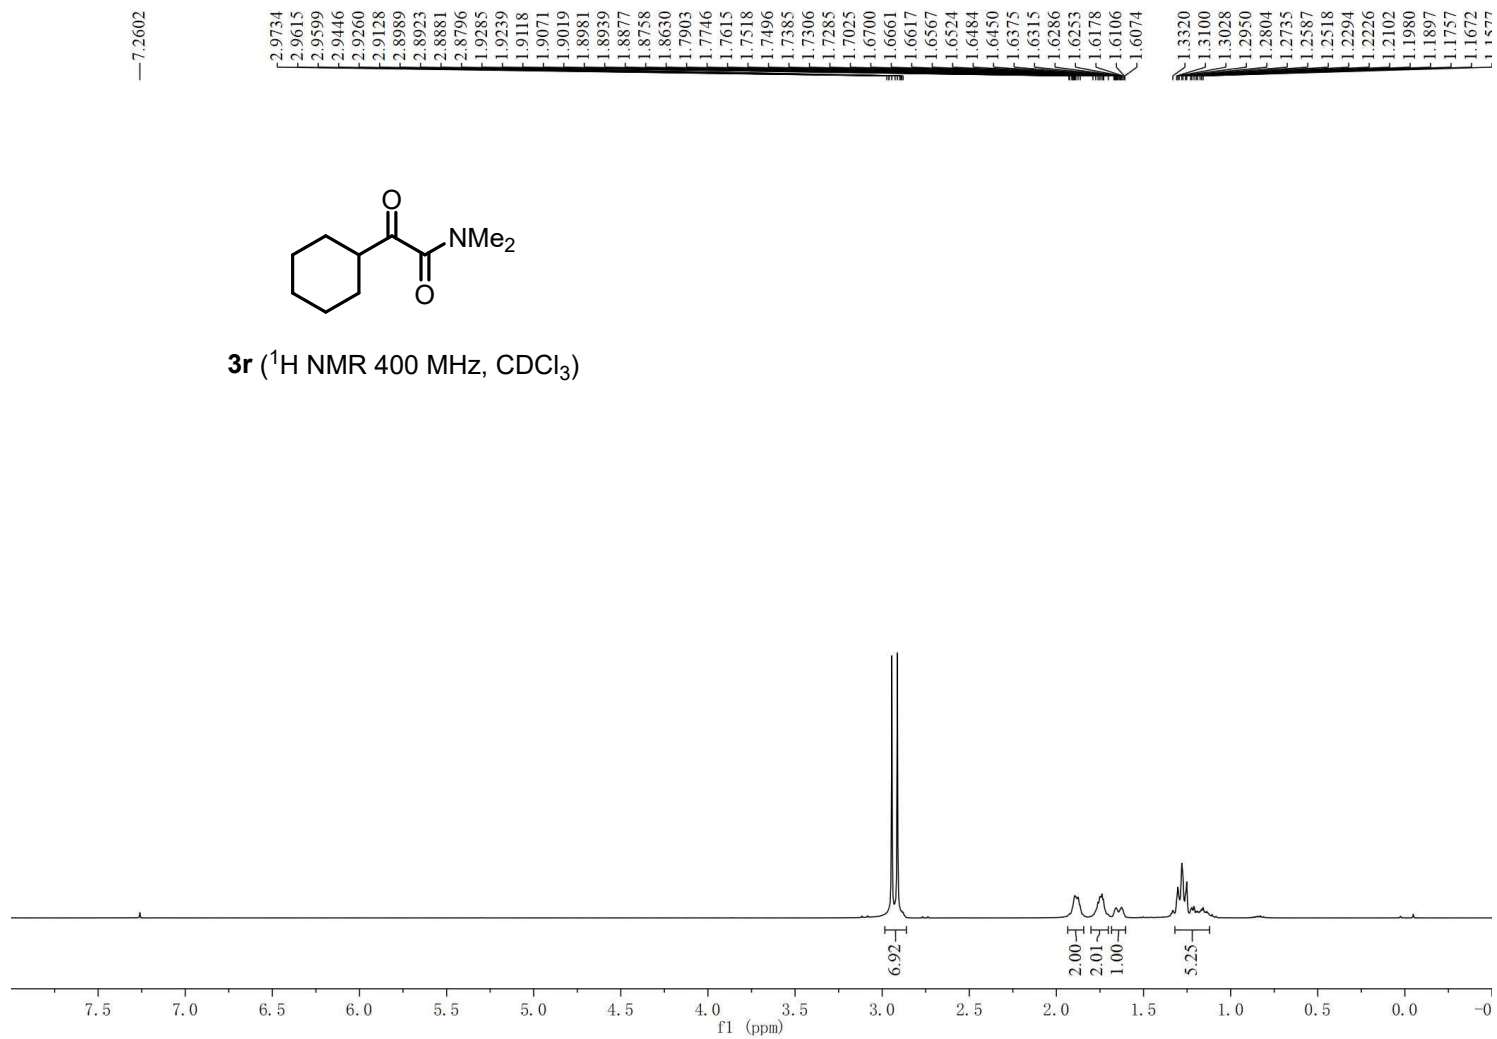

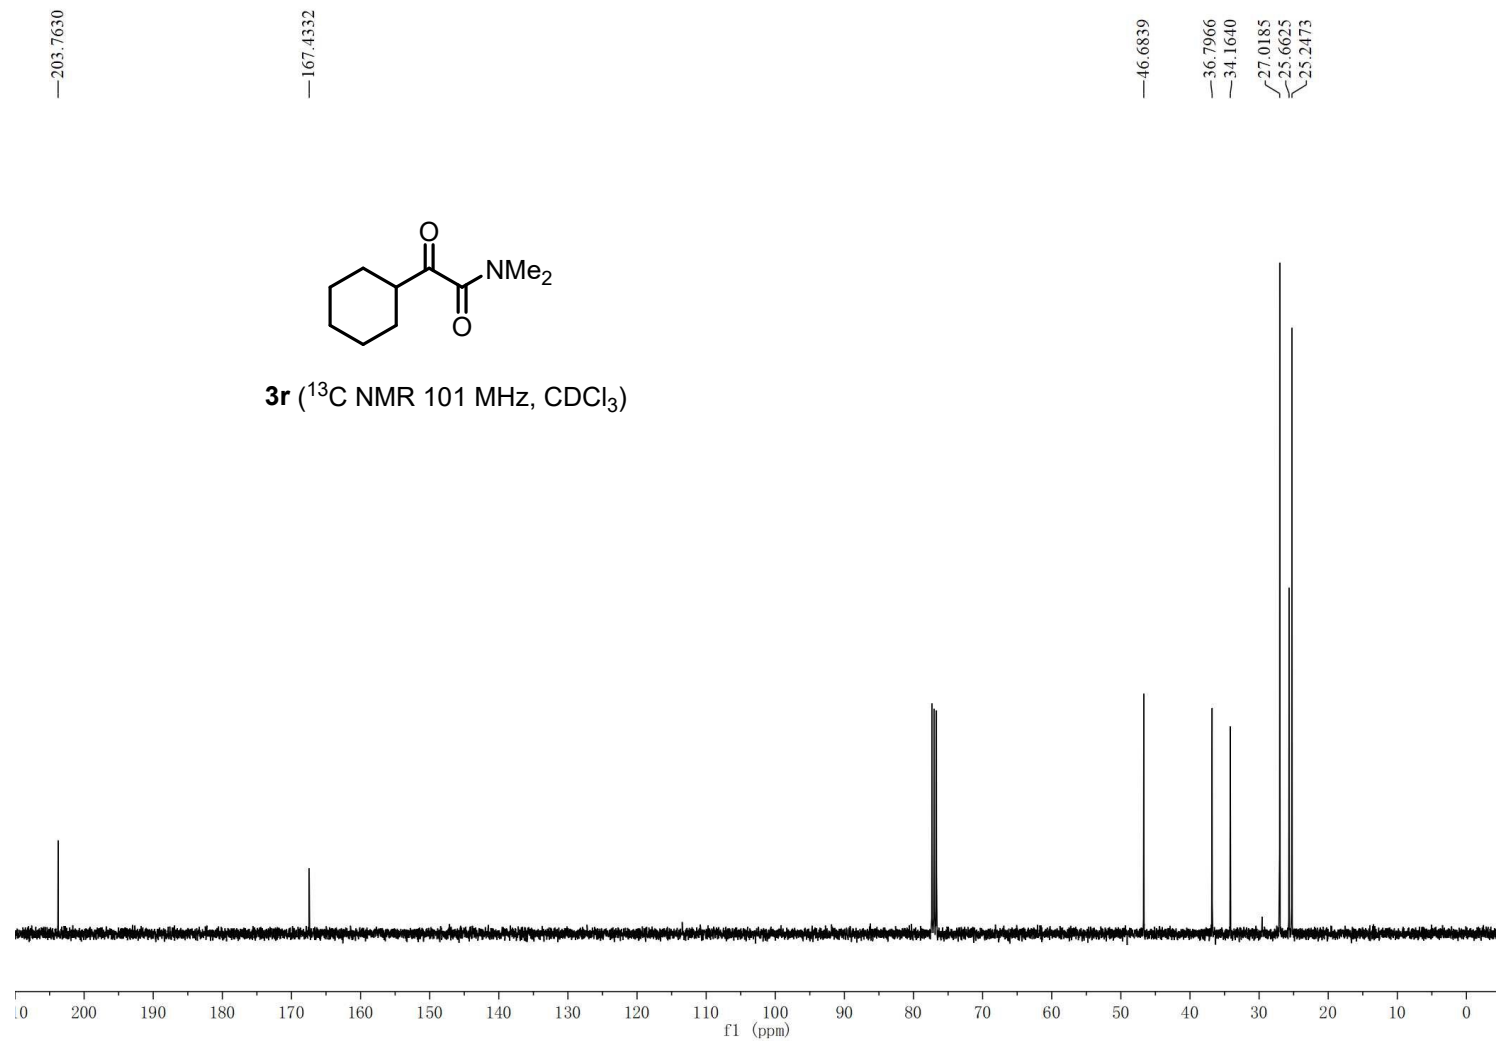

—7.2602

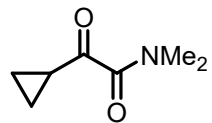

**3s** ( $^1\text{H}$  NMR 400 MHz,  $\text{CDCl}_3$ )

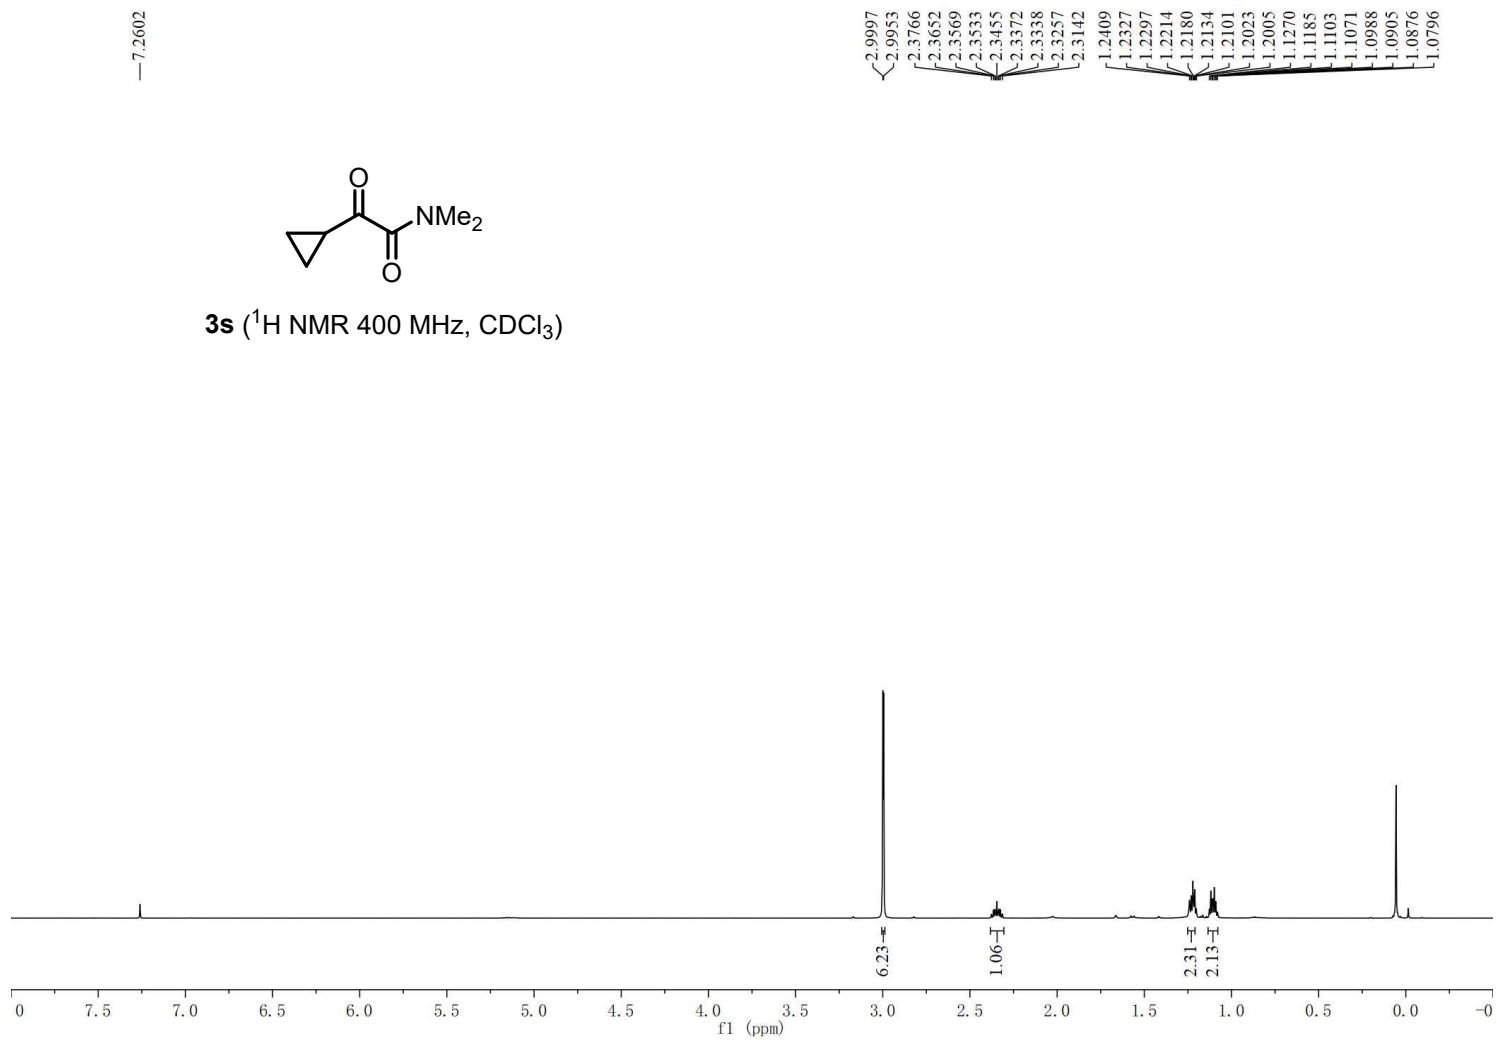

2.9997  
2.9953  
2.3766  
2.3652  
2.3569  
2.3533  
2.3455  
2.3372  
2.3338  
2.3257  
2.3142  
1.2409  
1.2327  
1.2297  
1.2214  
1.2180  
1.2134  
1.2101  
1.2023  
1.2005  
1.1270  
1.1185  
1.1103  
1.1071  
1.0988  
1.0905  
1.0876  
1.0796

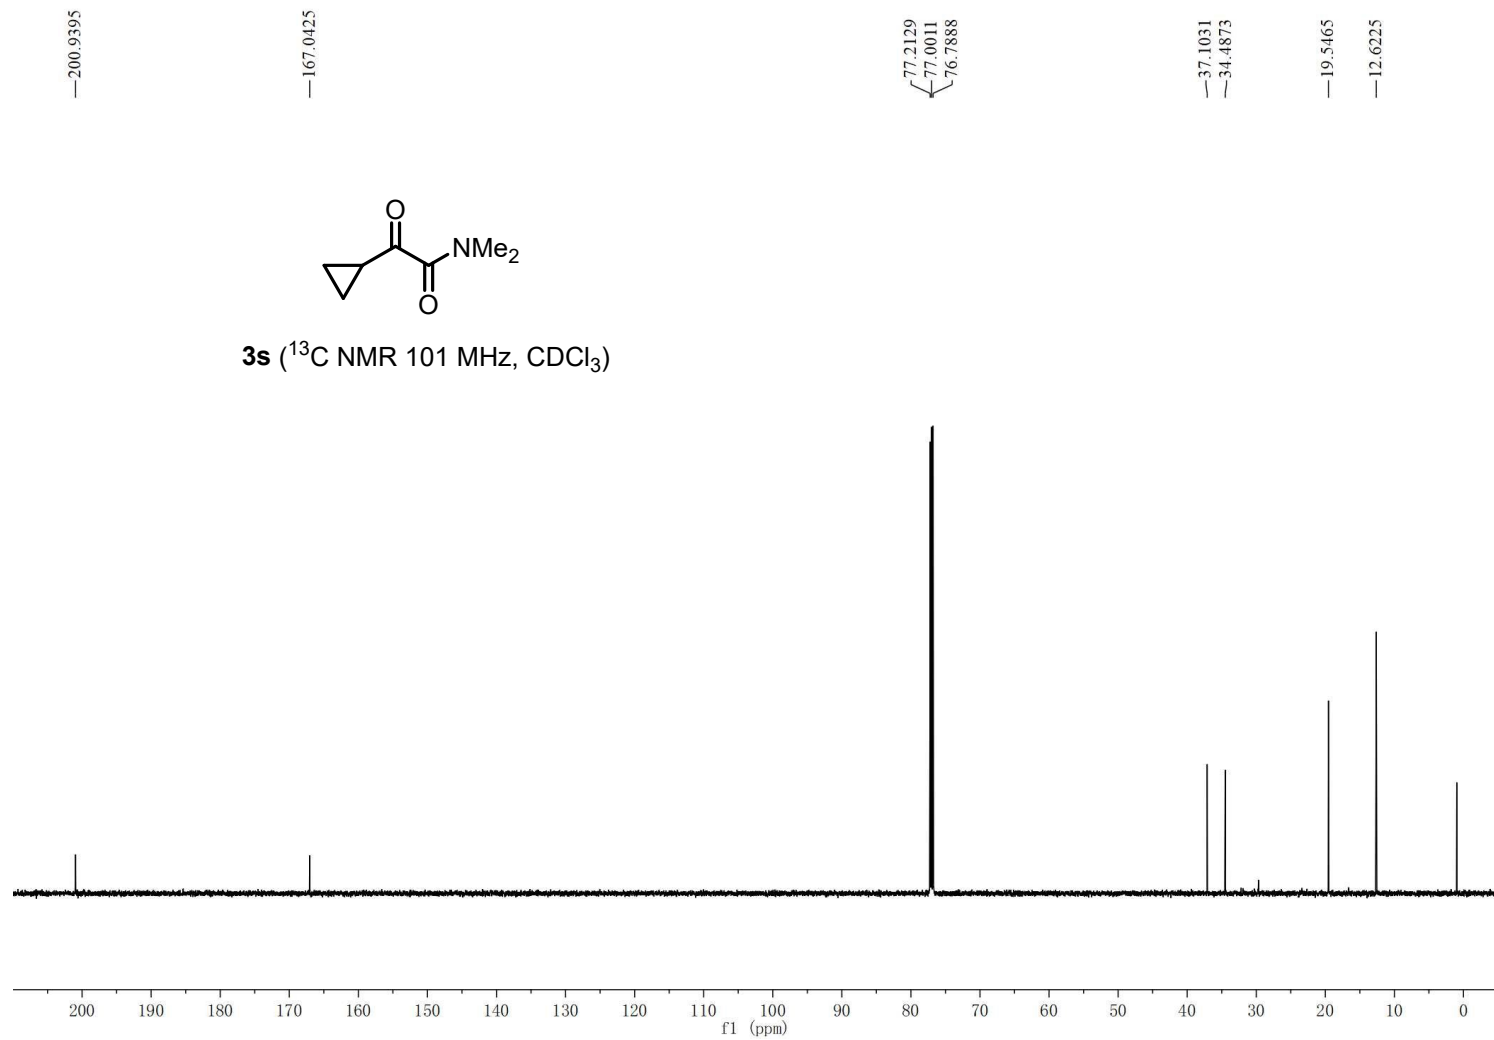

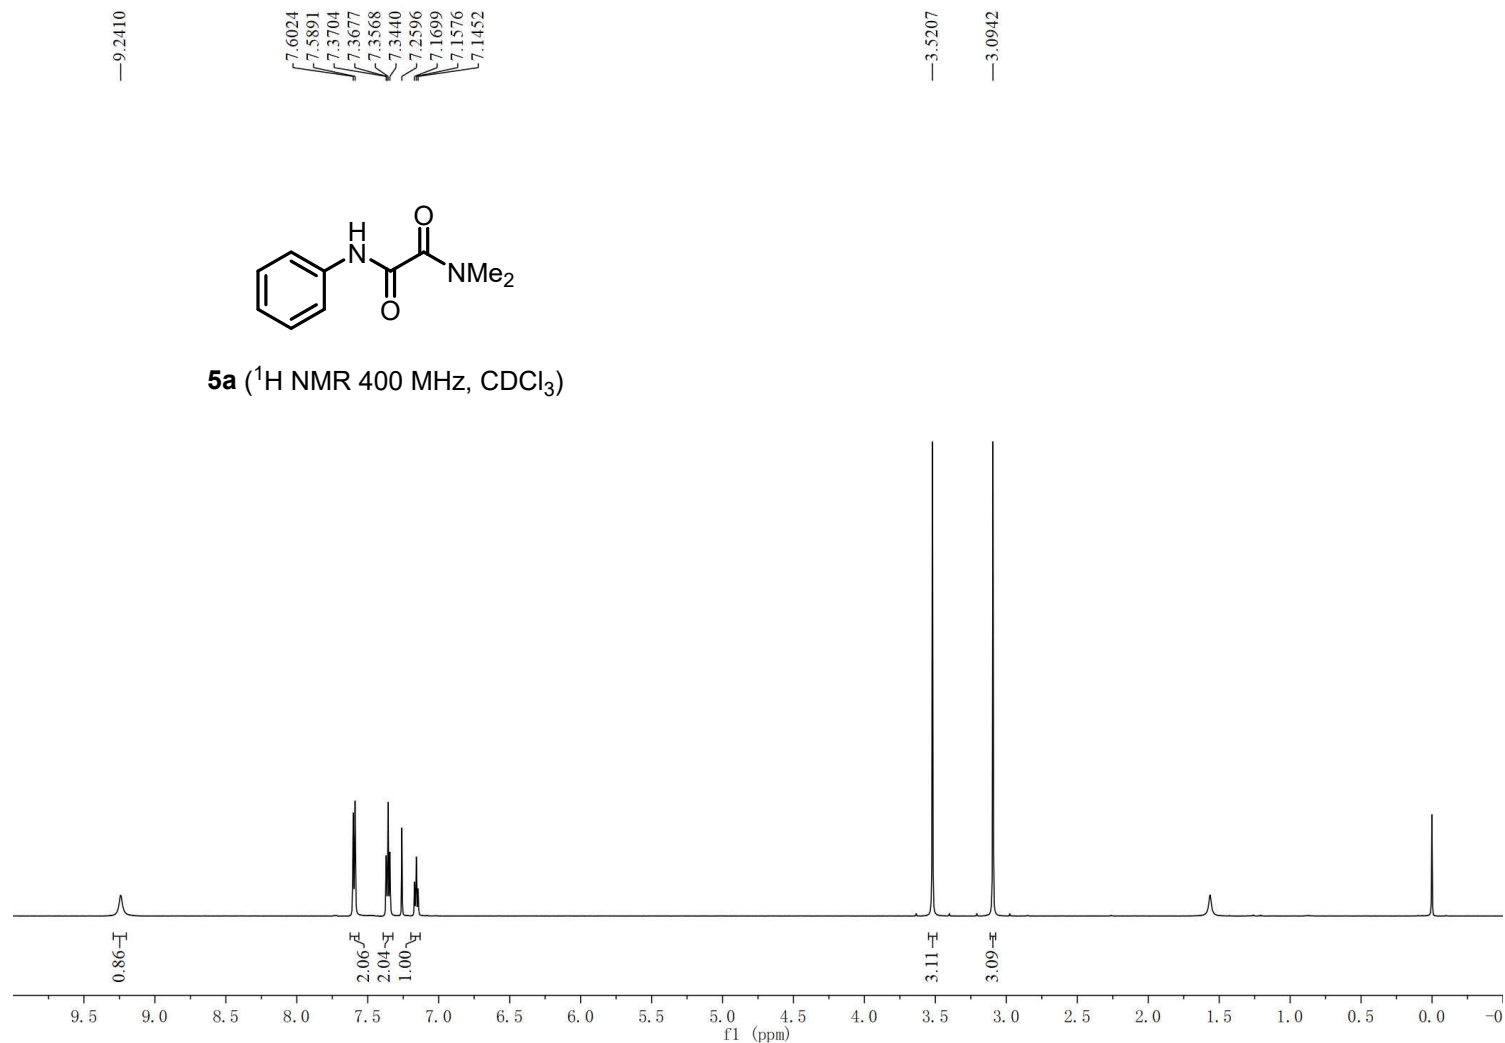



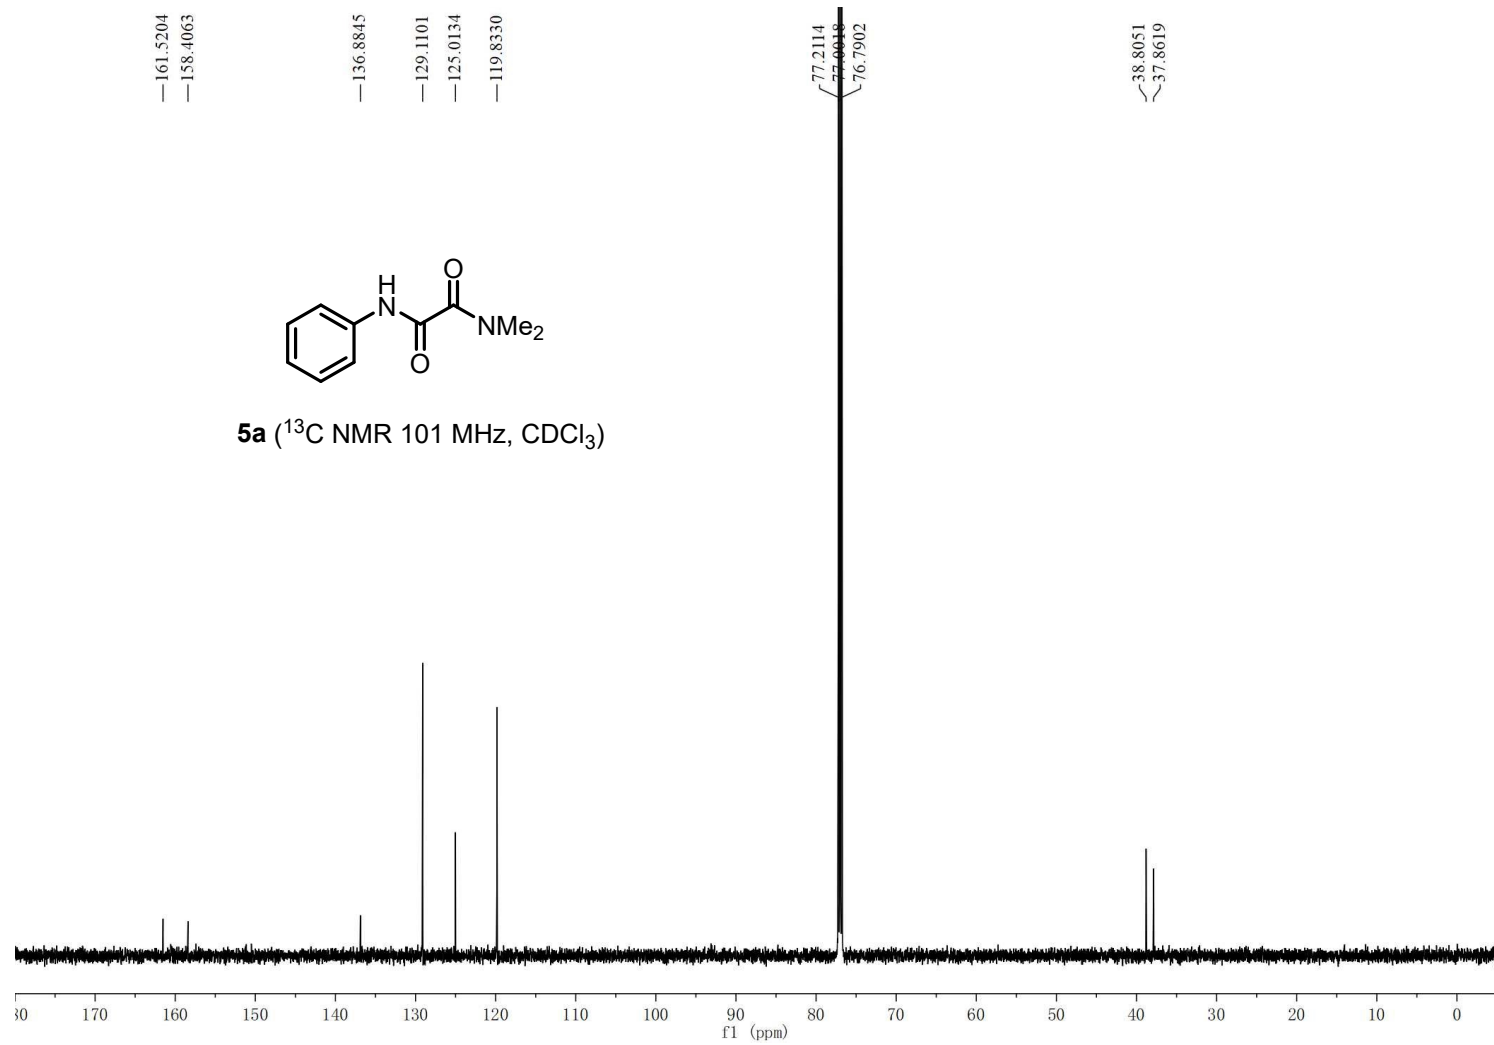

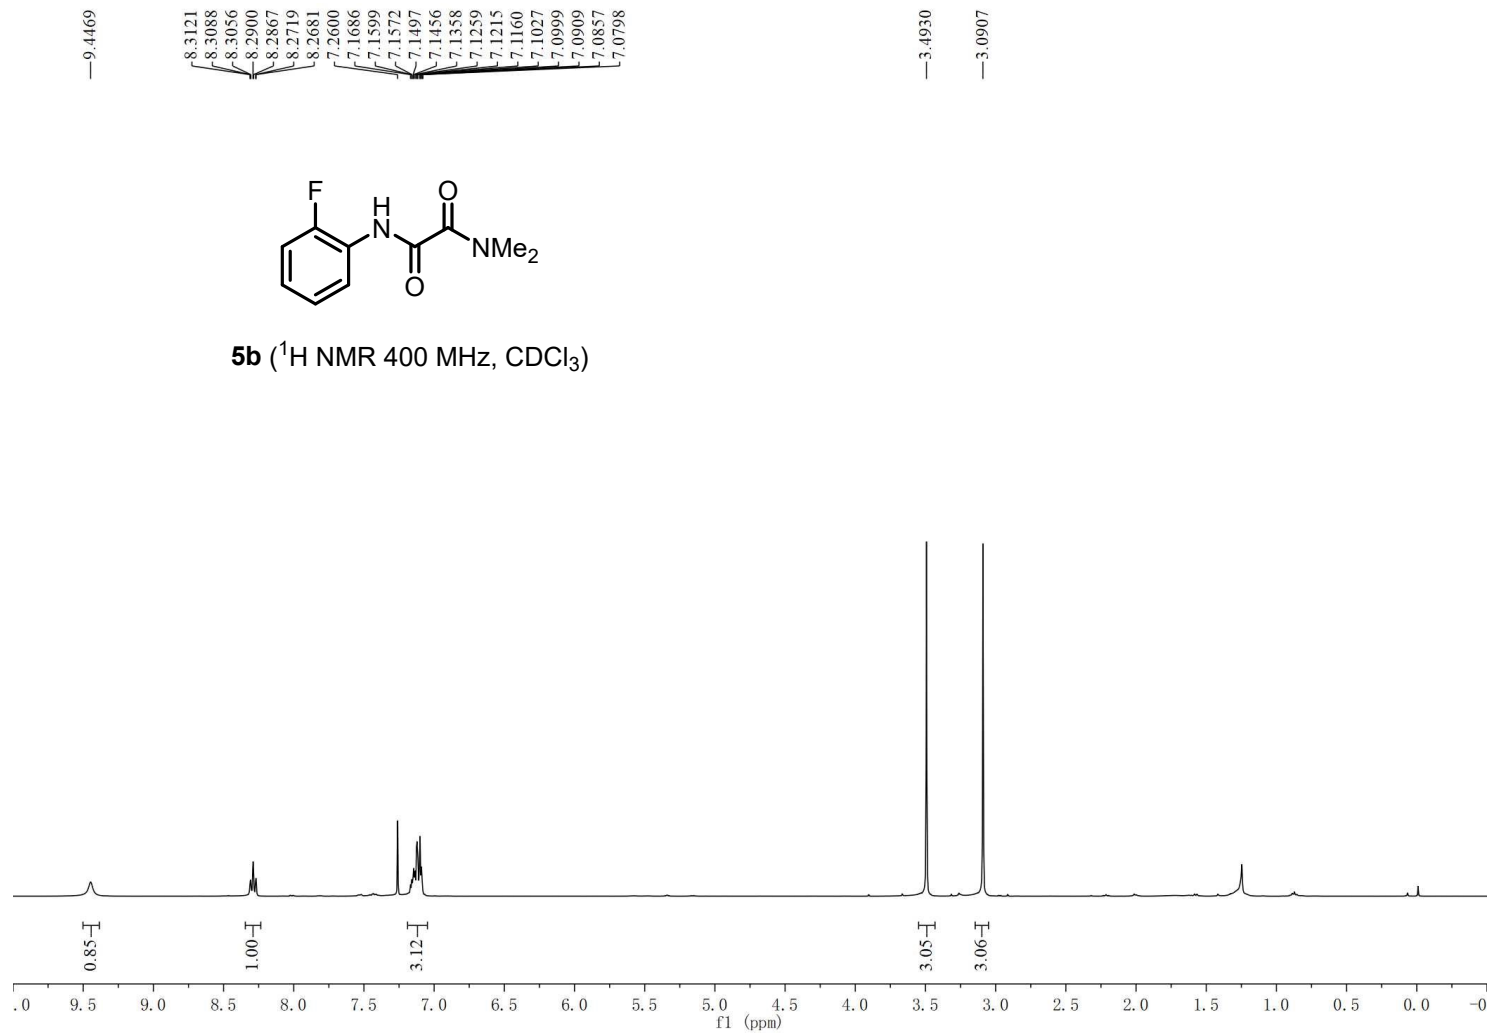

161.0617  
158.4953  
154.0342  
151.5919

125.3977  
125.3099  
125.2372  
124.4863  
124.4492  
121.2844  
115.2097  
115.0204

77.3169  
77.1996  
77.0002  
76.6814

38.6666  
37.7184

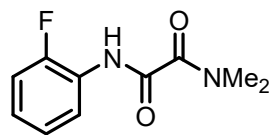

**5b** ( $^{13}\text{C}$  NMR 101 MHz,  $\text{CDCl}_3$ )

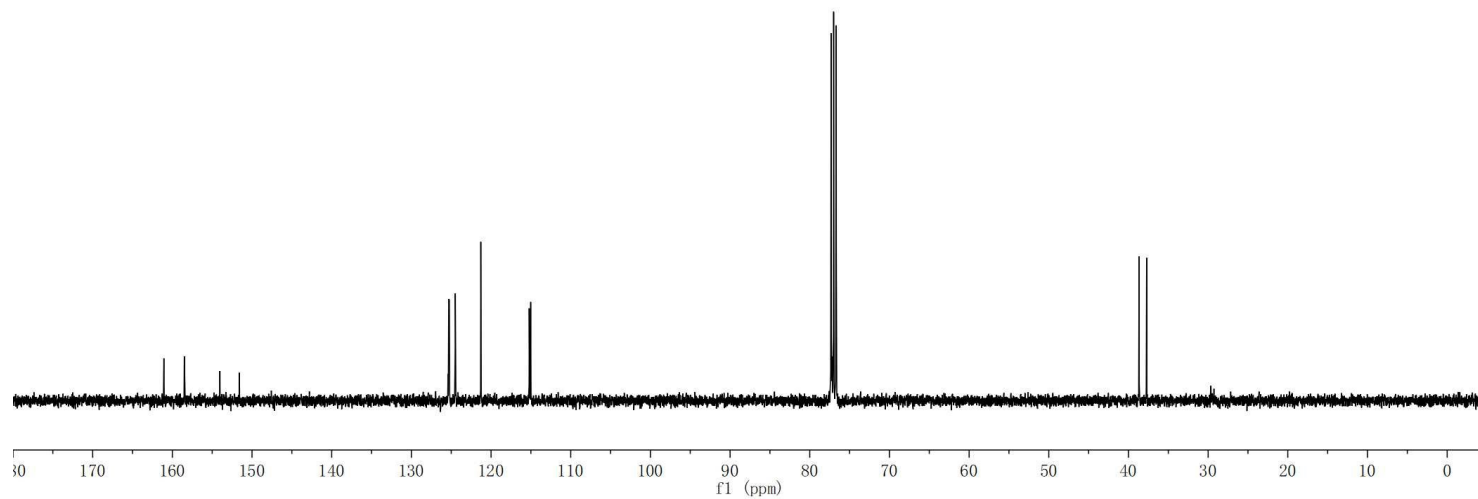

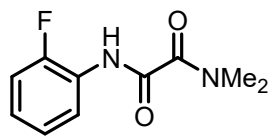

**5b** ( $^{19}\text{F}$  NMR 376 MHz,  $\text{CDCl}_3$ )

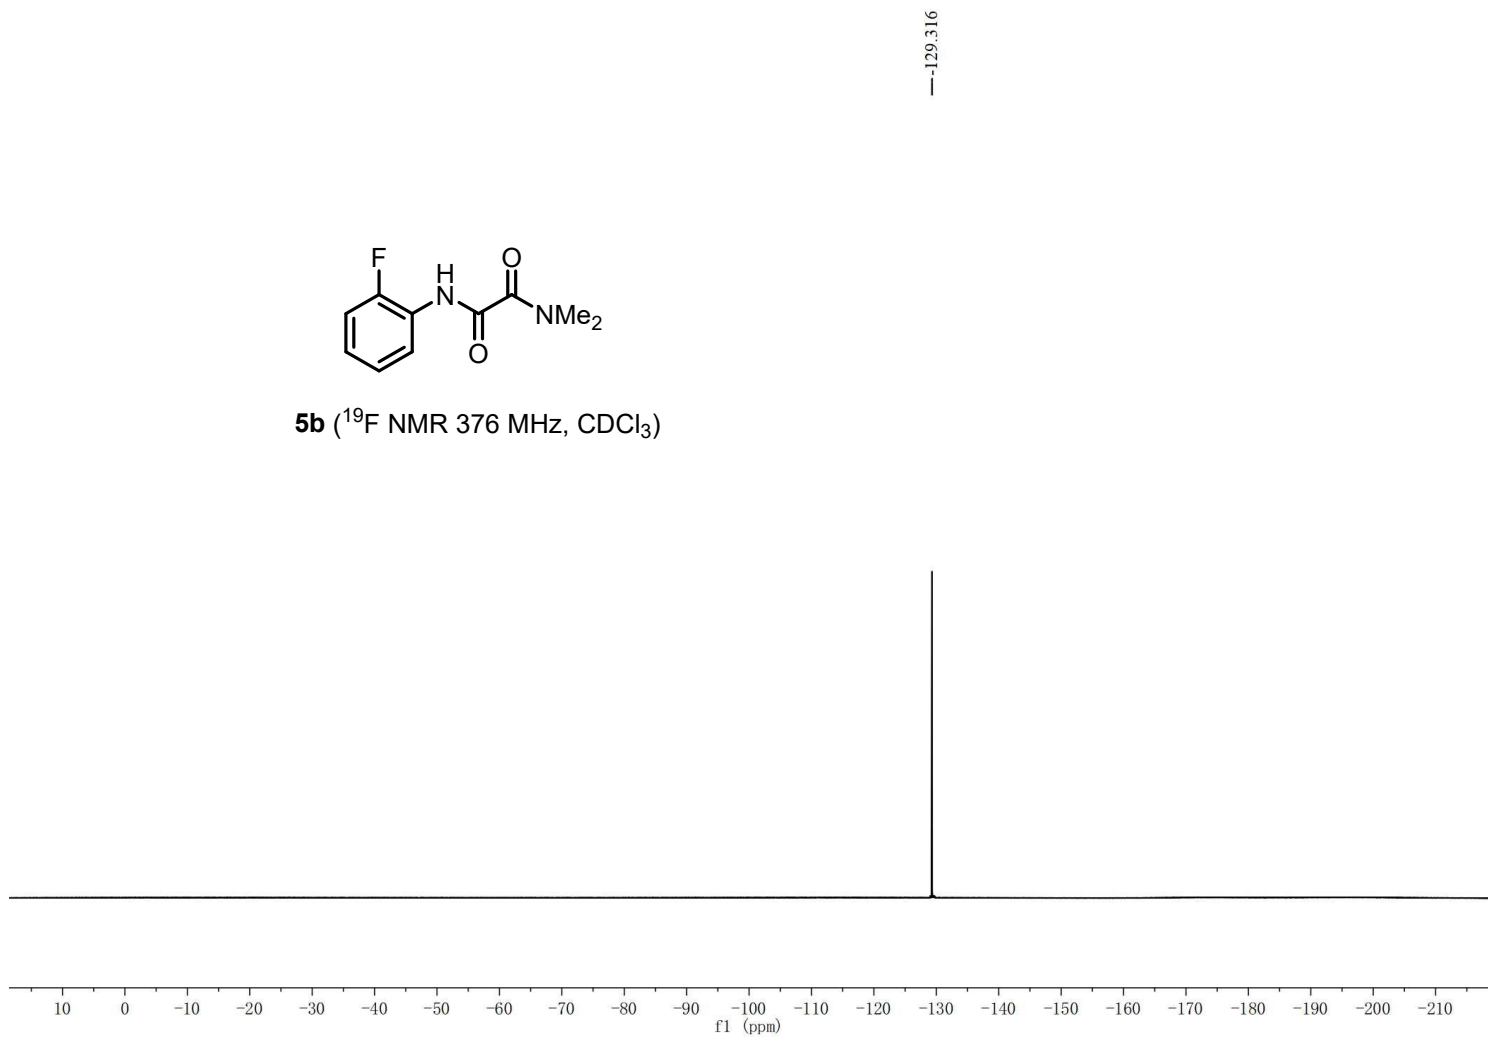

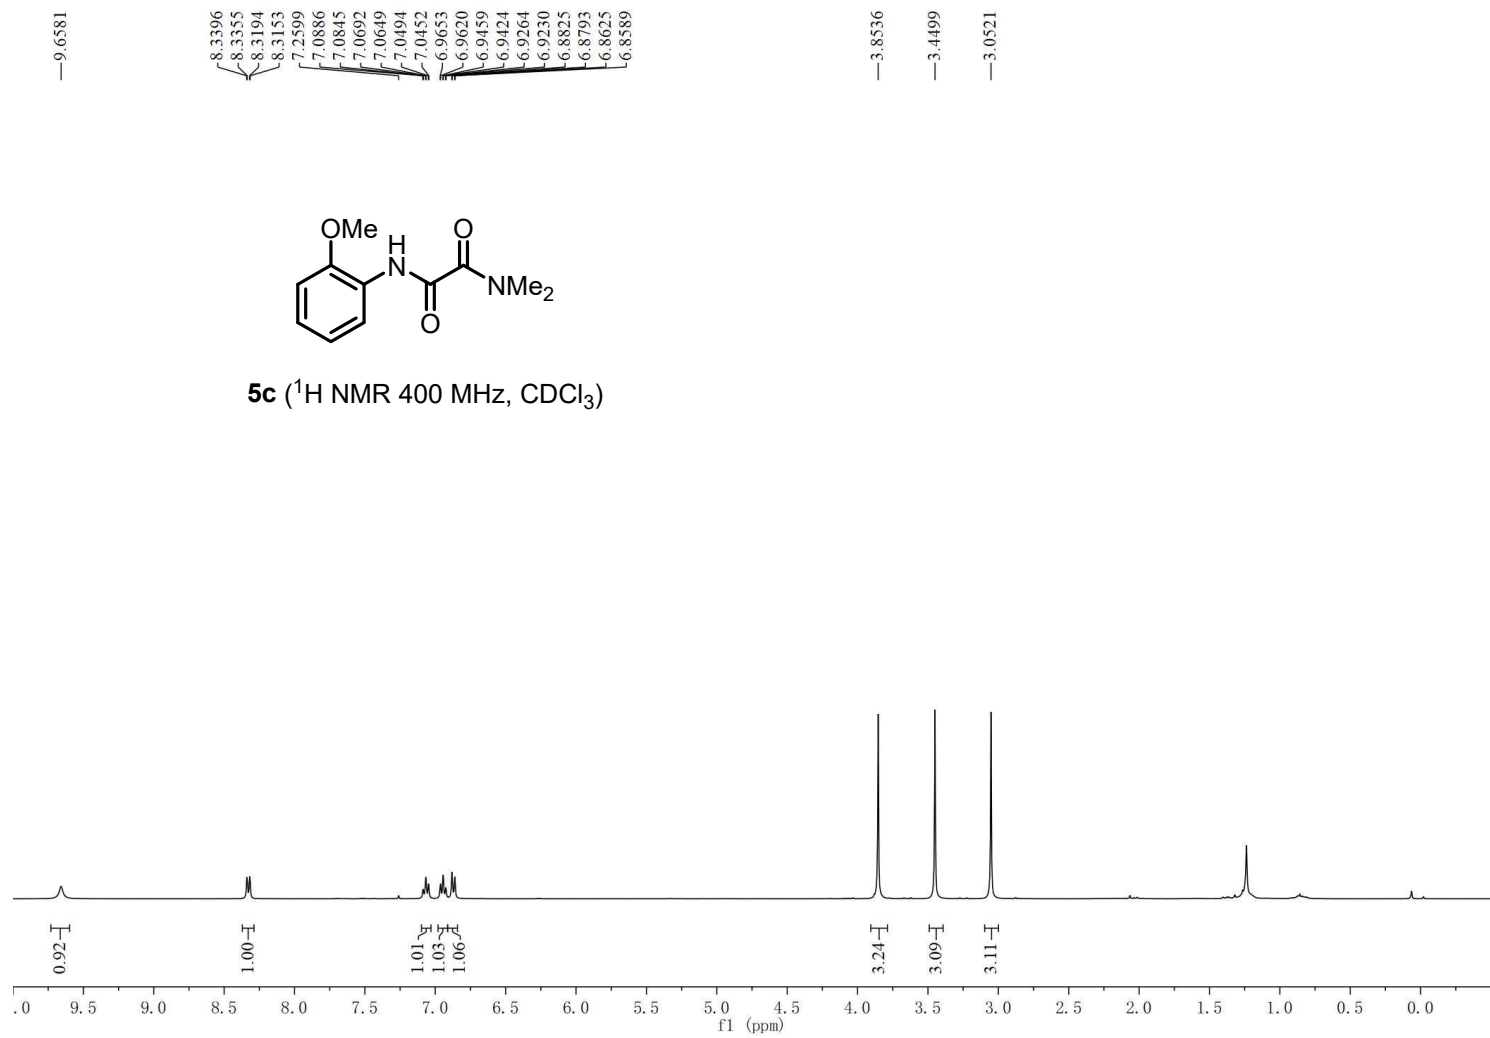

—161.8621  
—158.5284

—148.6784

—126.6411  
—124.7758  
—120.8736  
—119.5764

—110.1783

77.4785  
77.1591  
76.8422

—55.7180

—38.6570  
—37.5197

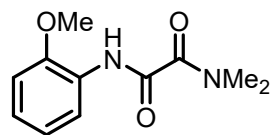

**5c** ( $^{13}\text{C}$  NMR 101 MHz,  $\text{CDCl}_3$ )

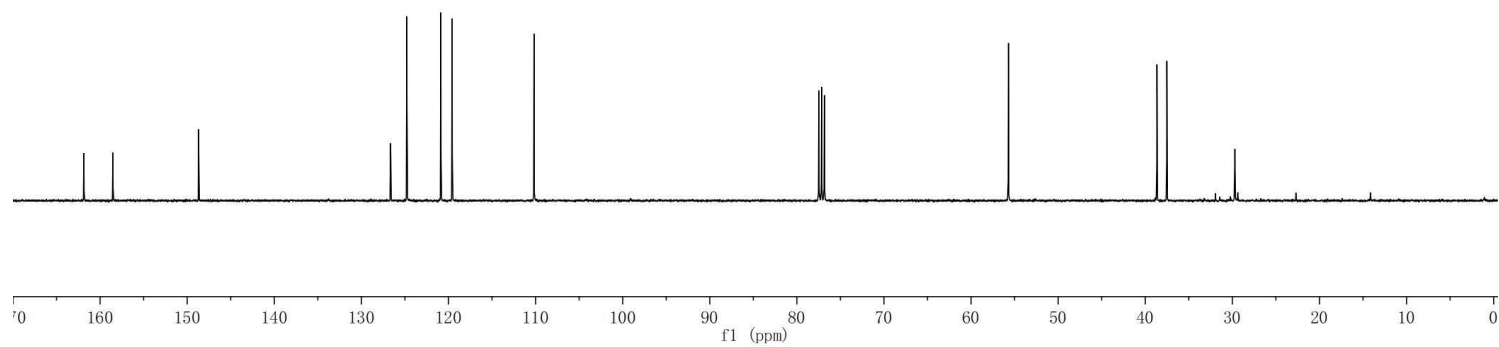

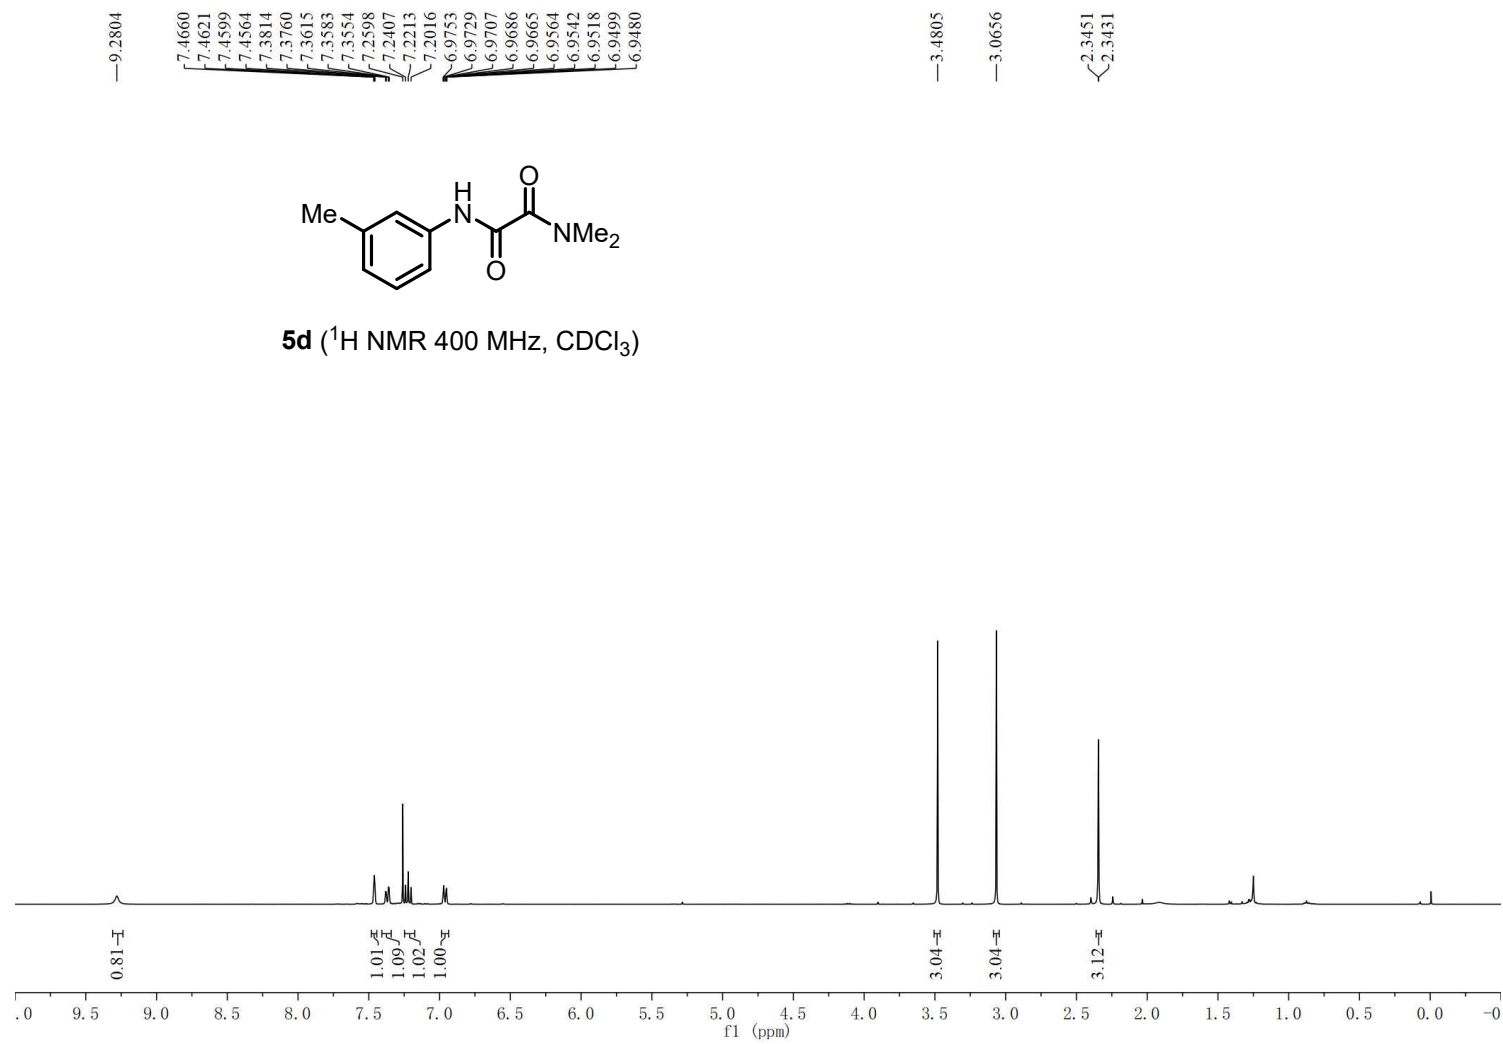

—161.8545  
—158.6413

—139.1316  
—136.9075

—128.9827  
—125.9119

—120.5576  
—117.0903

77.4781  
77.3613  
77.1595  
76.8431

38.8774  
37.8051

—21.5775

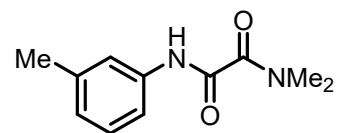

**5d** ( $^{13}\text{C}$  NMR 101 MHz,  $\text{CDCl}_3$ )

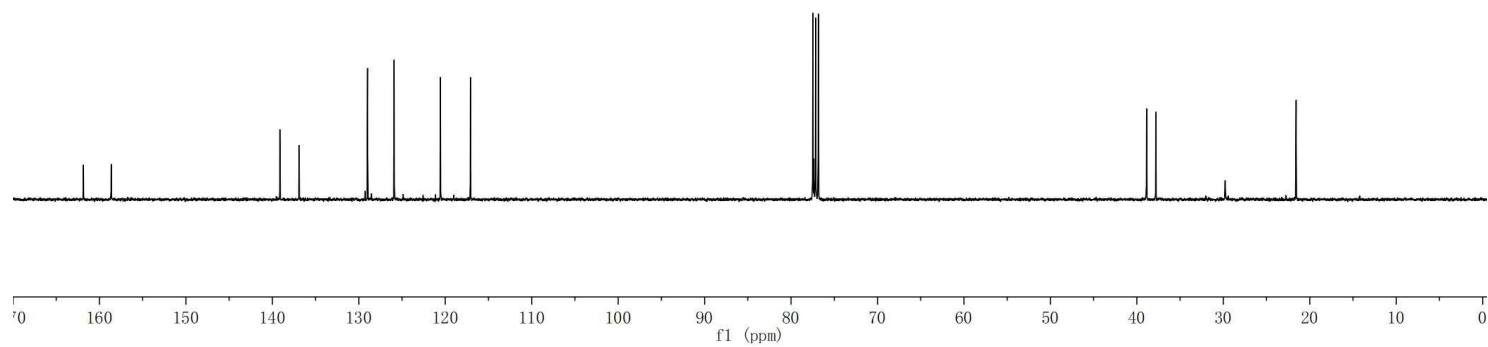



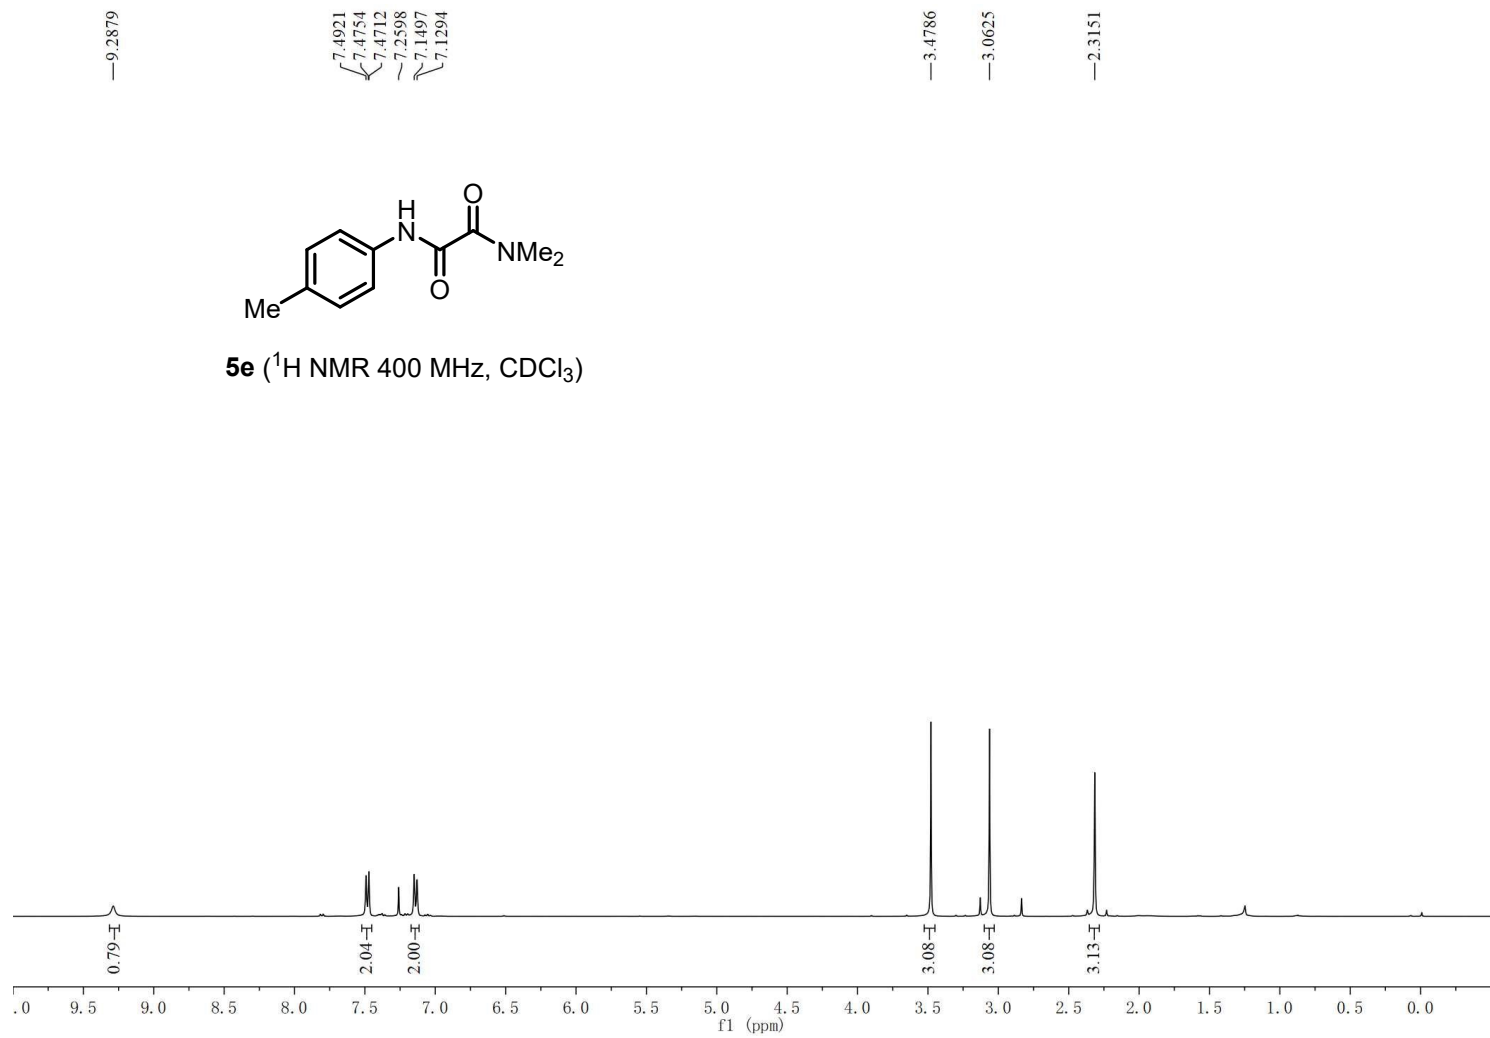

—161.7567  
—158.4082

134.5994  
134.2996  
129.4944

—119.7883

77.3197  
76.9996  
76.6835

38.6880  
37.6004

—20.8504

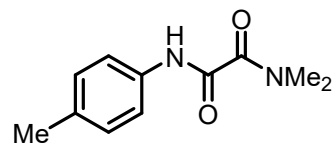

**5e** ( $^{13}\text{C}$  NMR 101 MHz,  $\text{CDCl}_3$ )

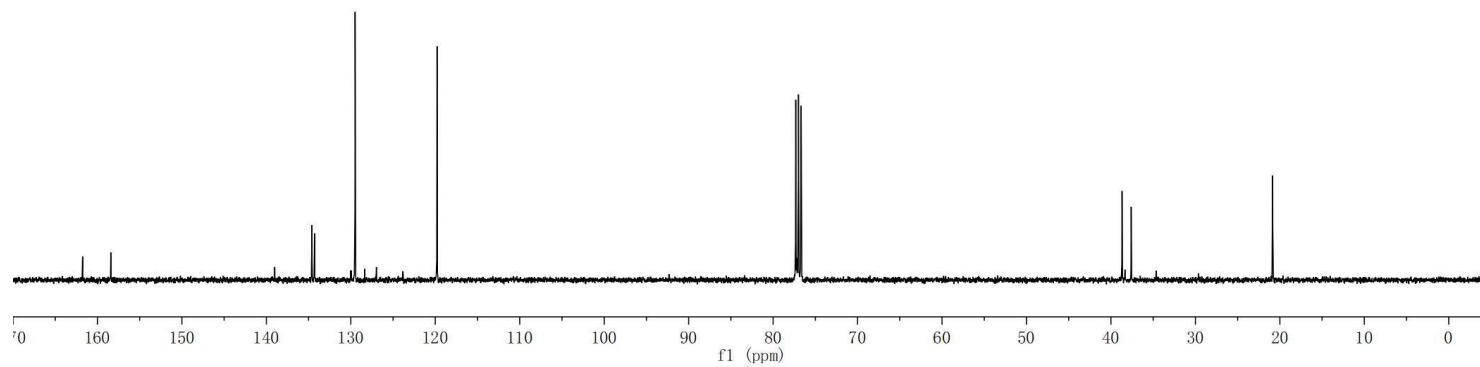

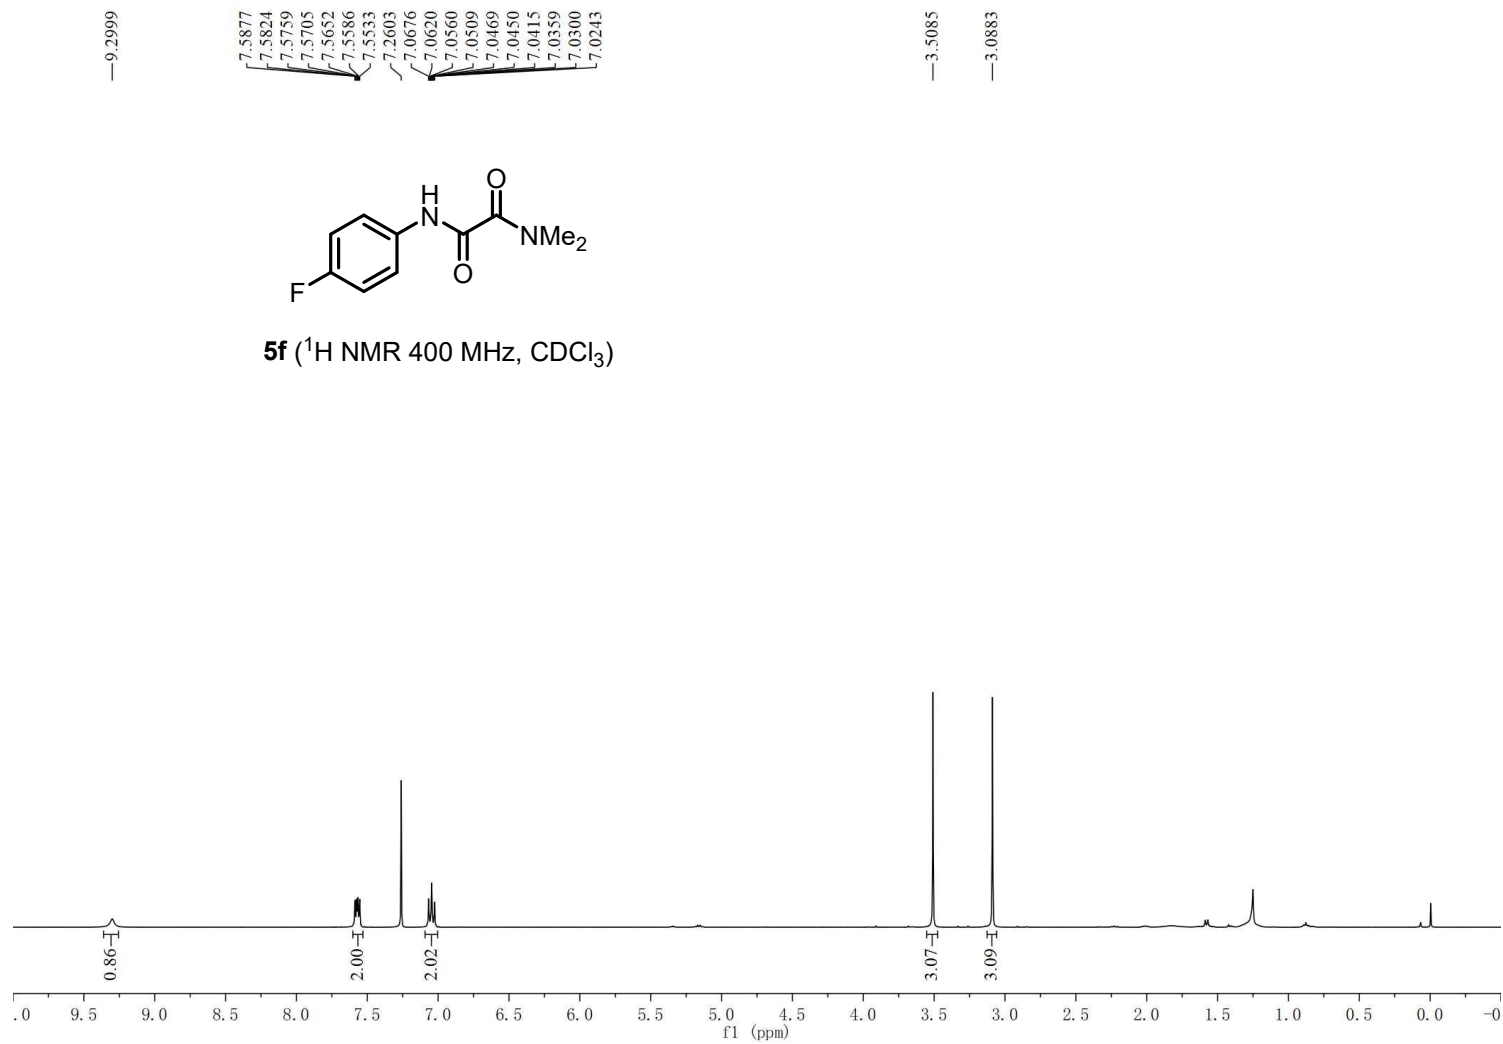

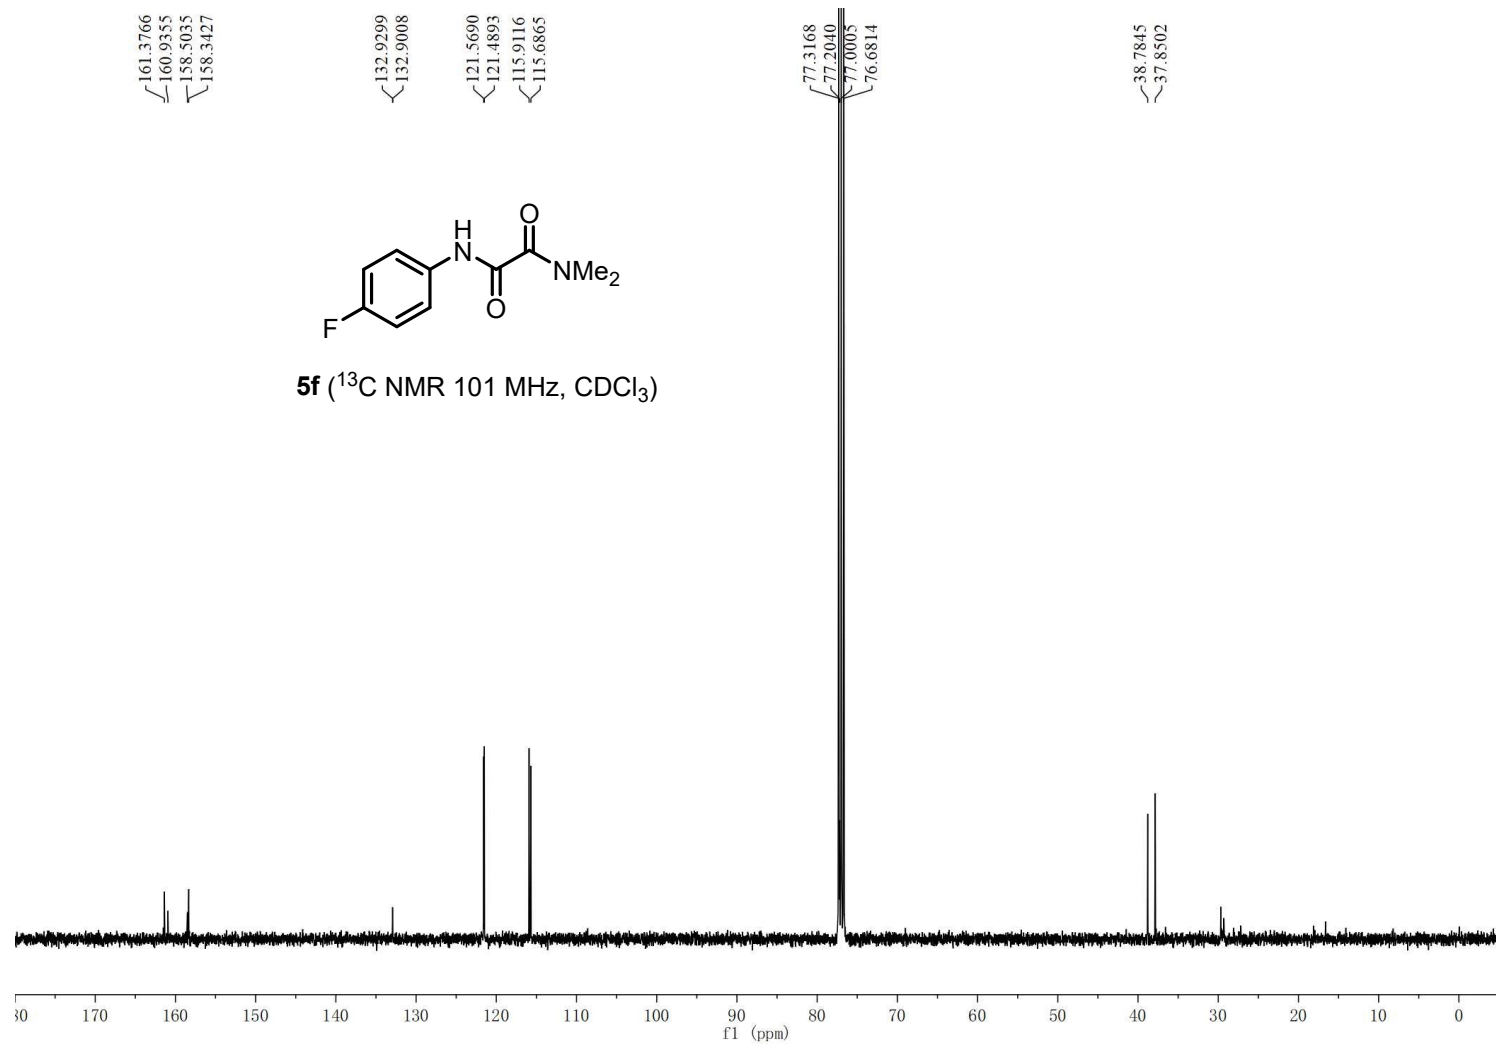

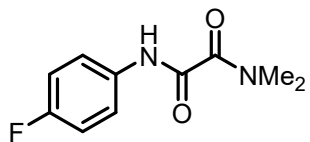

**5f** ( $^{19}\text{F}$  NMR 376 MHz,  $\text{CDCl}_3$ )

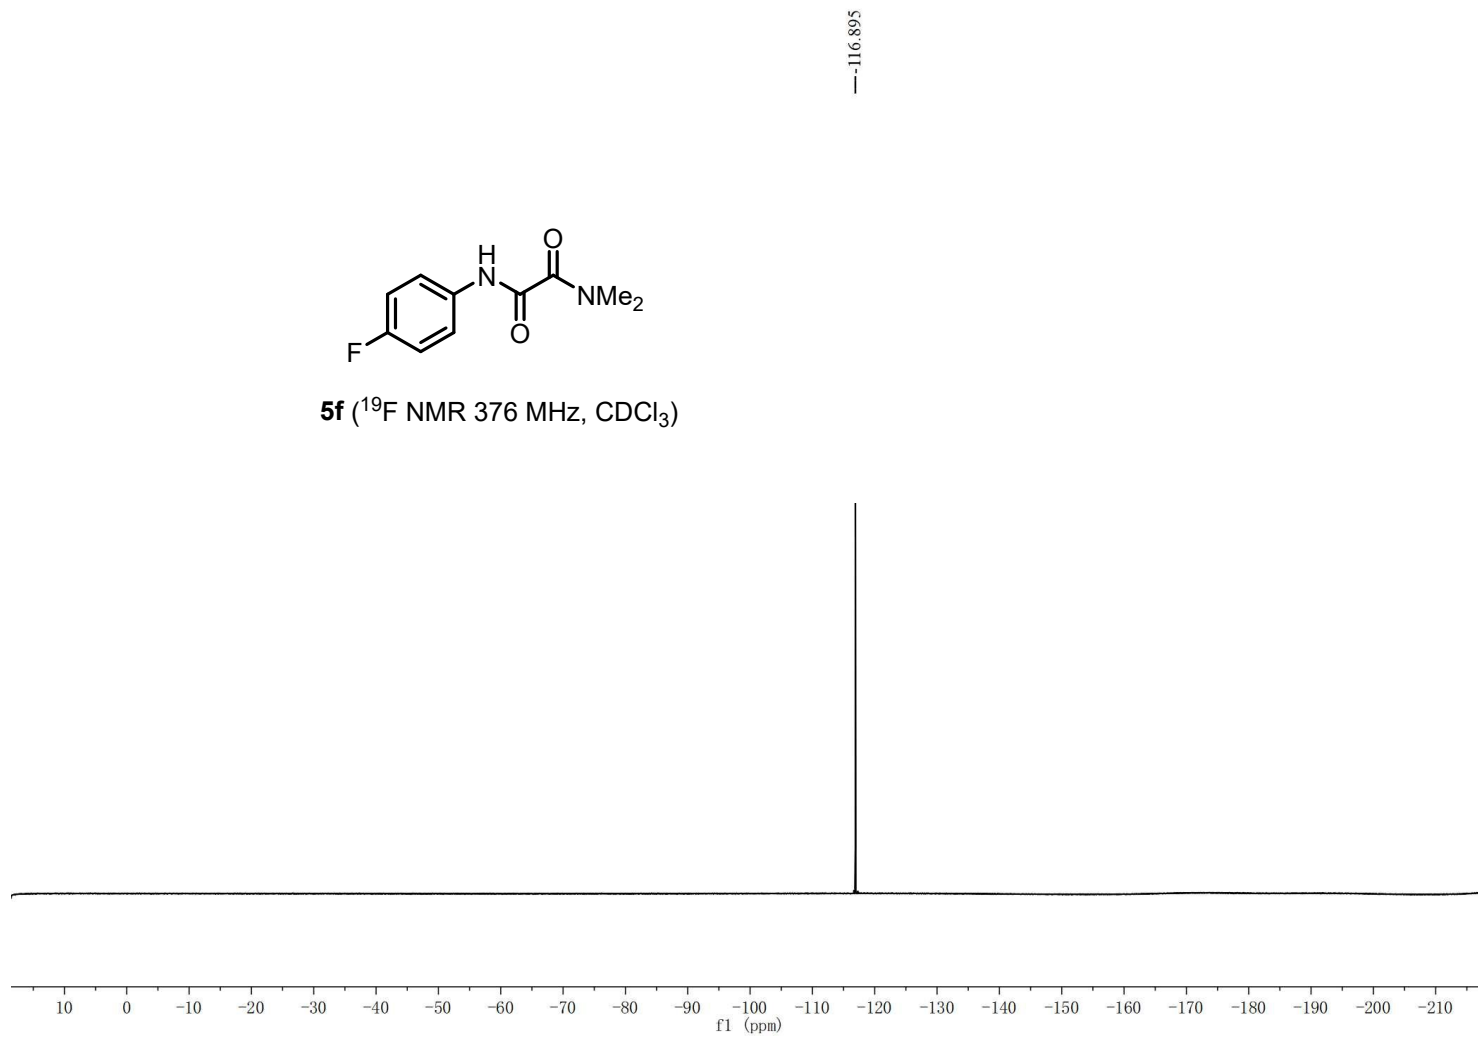

7.3978  
7.3929  
7.3877  
7.3810  
7.3758  
7.3716  
7.3667  
7.3624  
7.3605  
7.3541  
7.3484  
7.3445  
7.3390  
7.3346  
7.3307  
7.3214  
7.3171  
7.3126  
7.3101  
7.3059  
7.3001  
7.2937  
7.2892  
7.2859  
7.2605  
7.2559  
7.2471  
7.2424  
7.2249

— 3.0880

— 2.7447

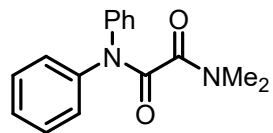

**5g** ( $^1\text{H}$  NMR 400 MHz,  $\text{CDCl}_3$ )

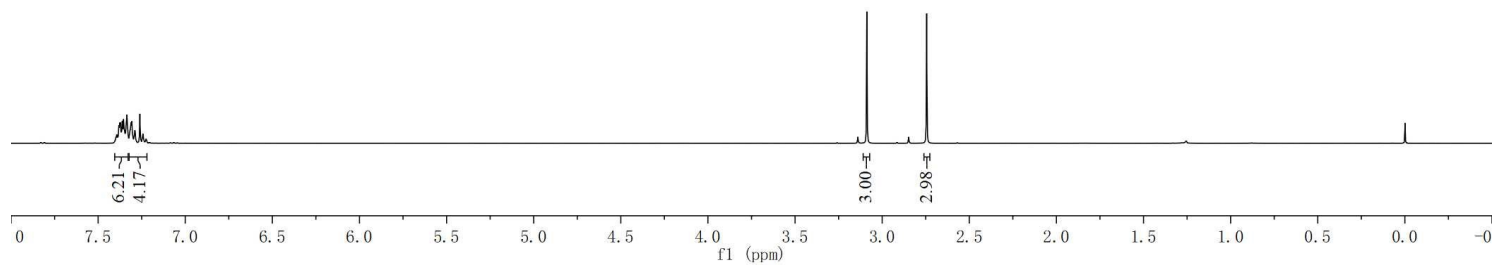

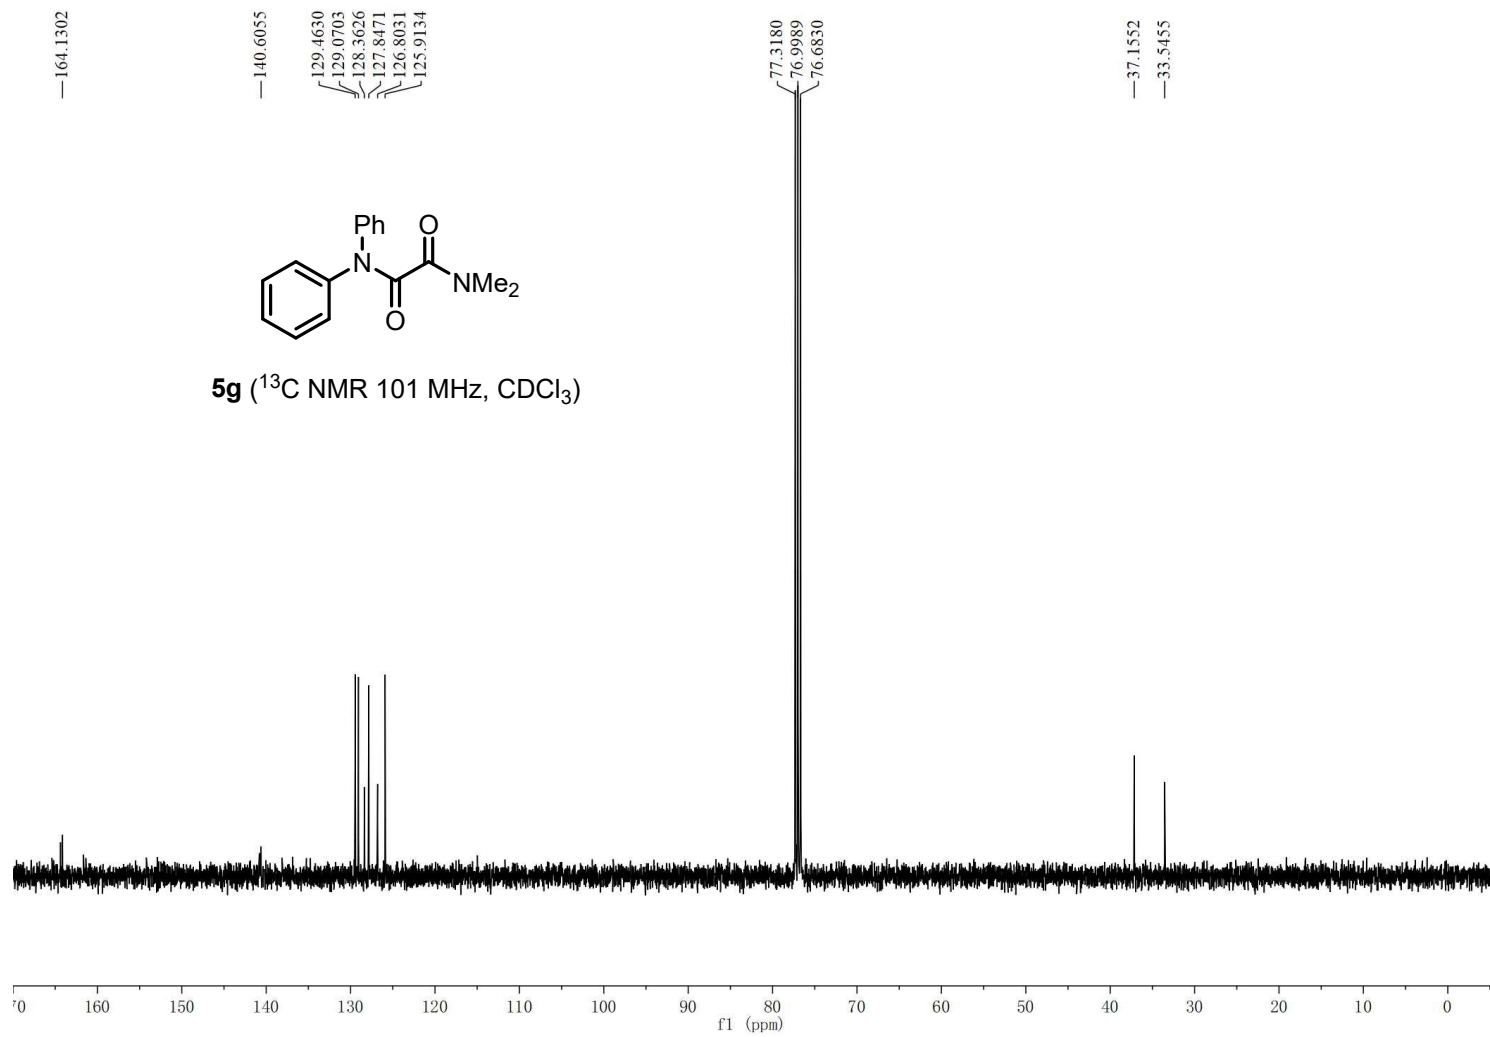

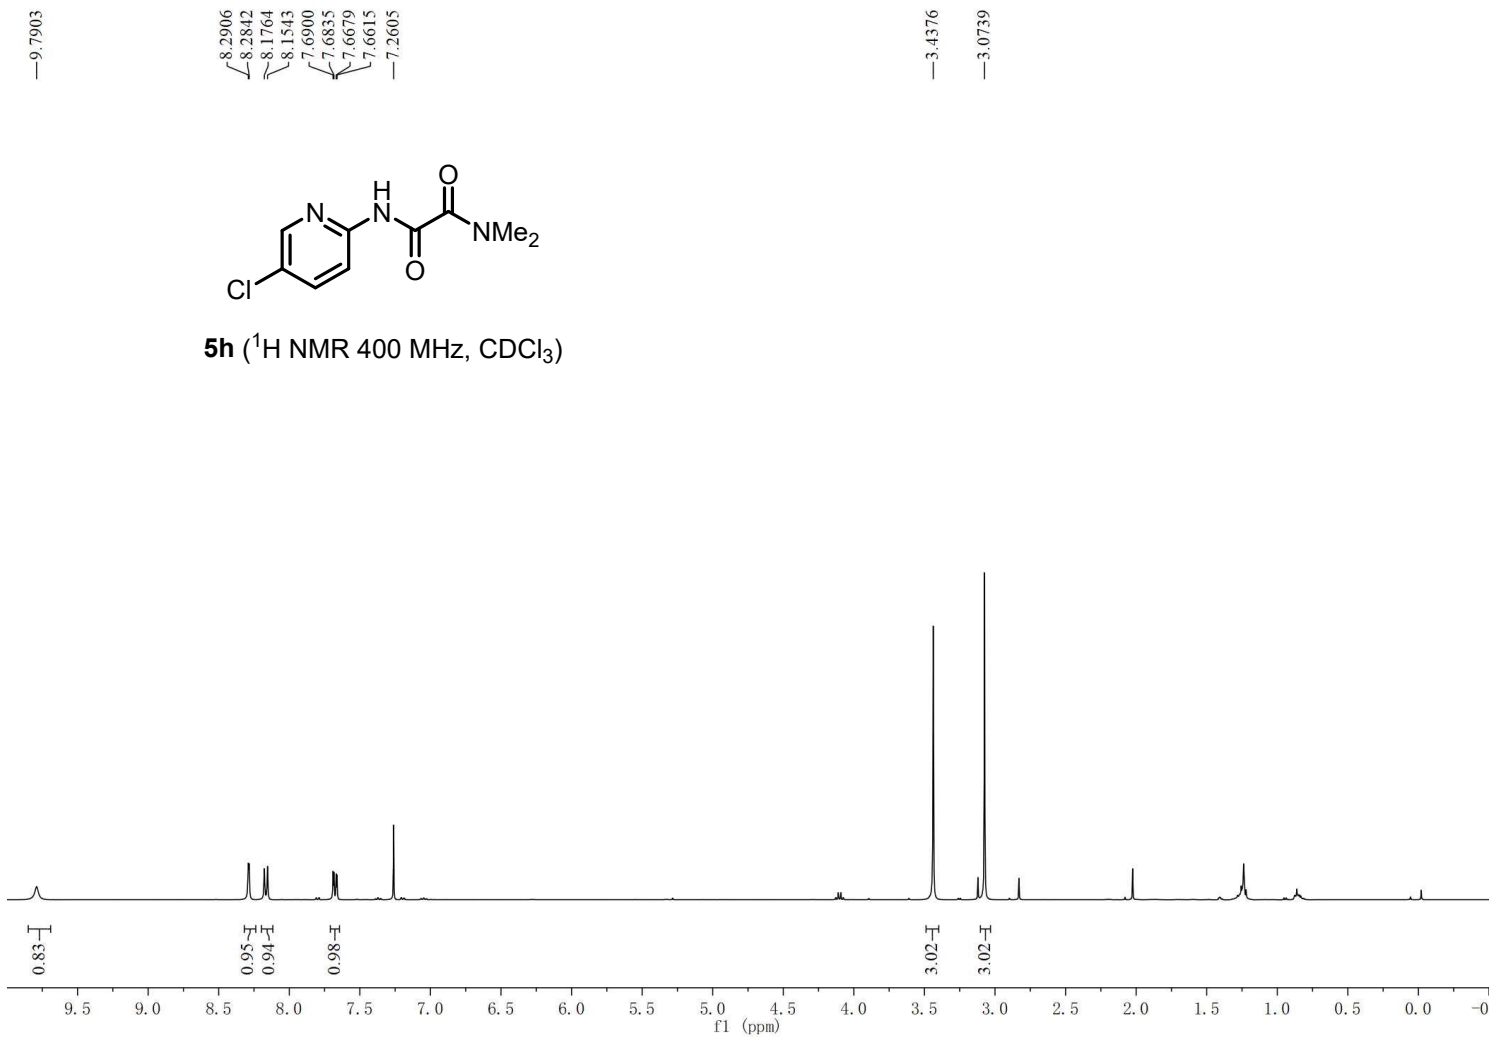



160.9926  
159.1161

148.8315  
147.1238

137.9625

127.5784

114.6247

38.6644  
37.6659

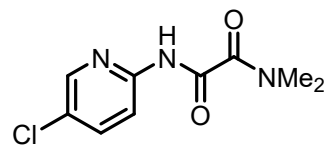

**5h** ( $^{13}\text{C}$  NMR 101 MHz,  $\text{CDCl}_3$ )

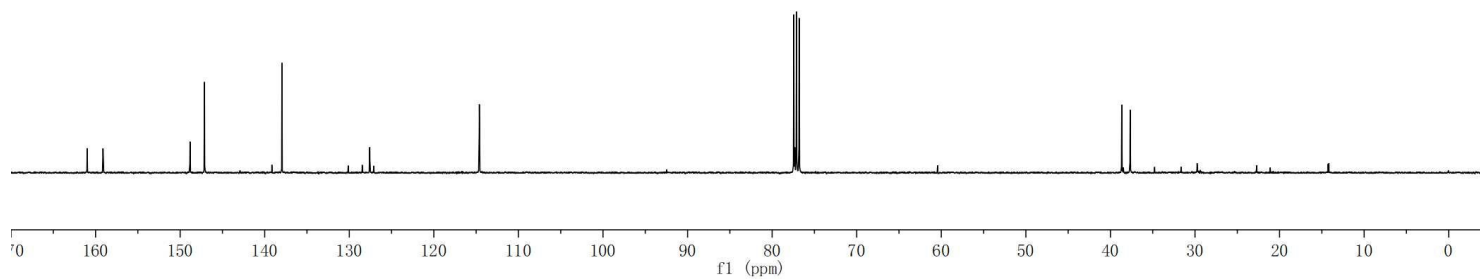

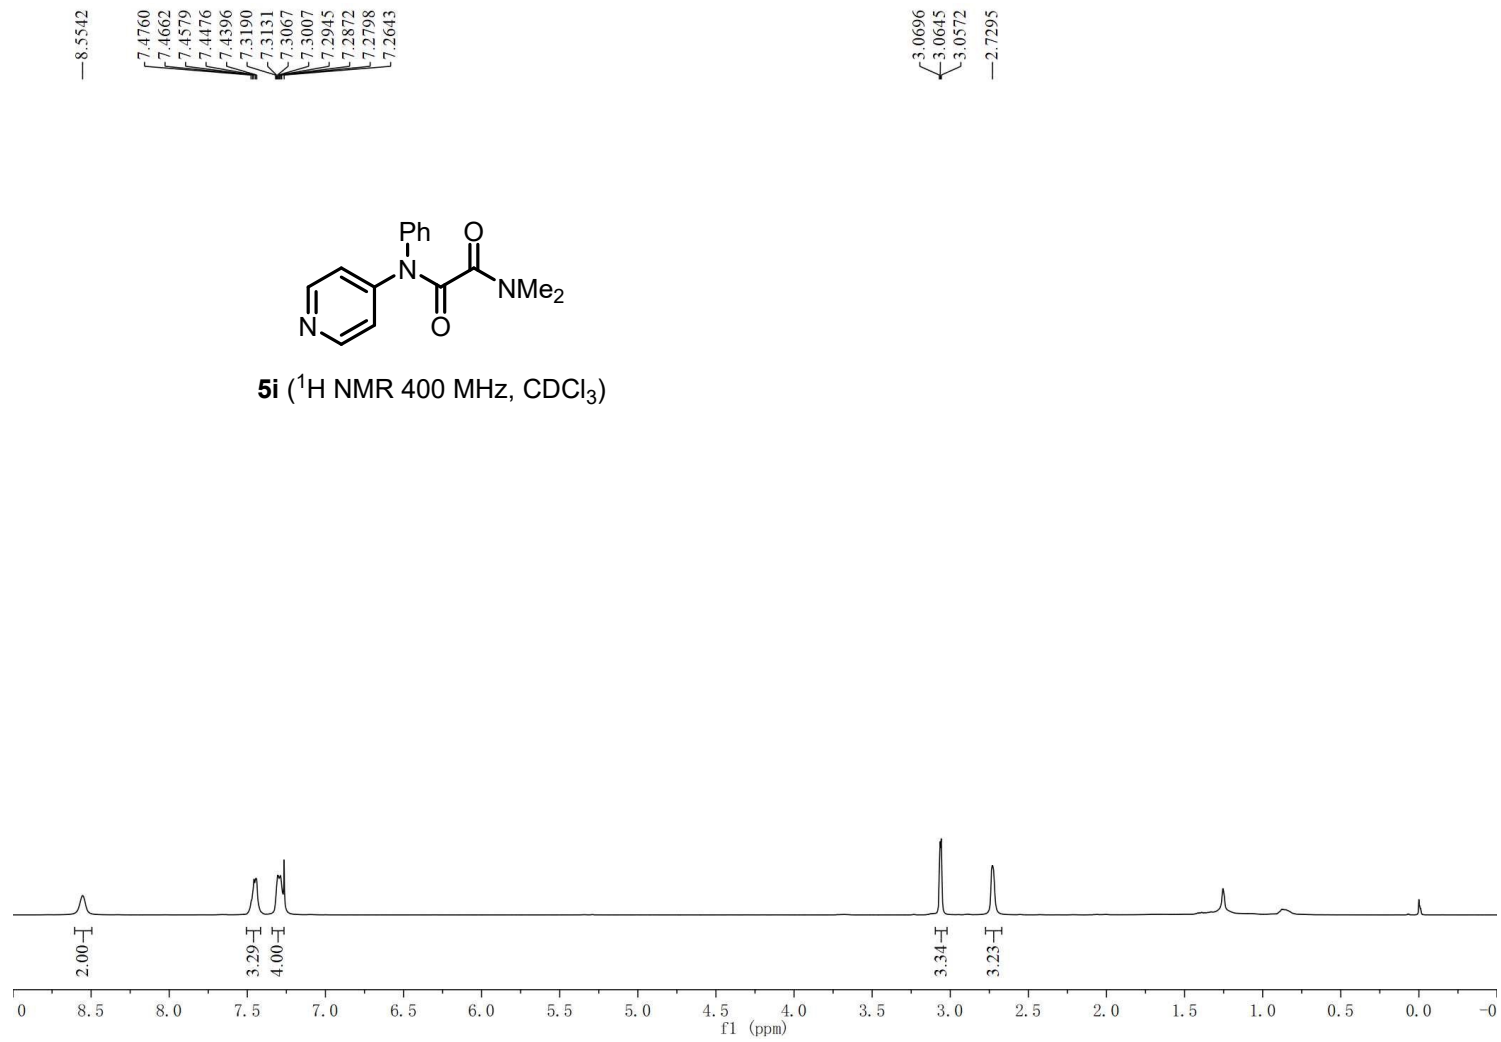

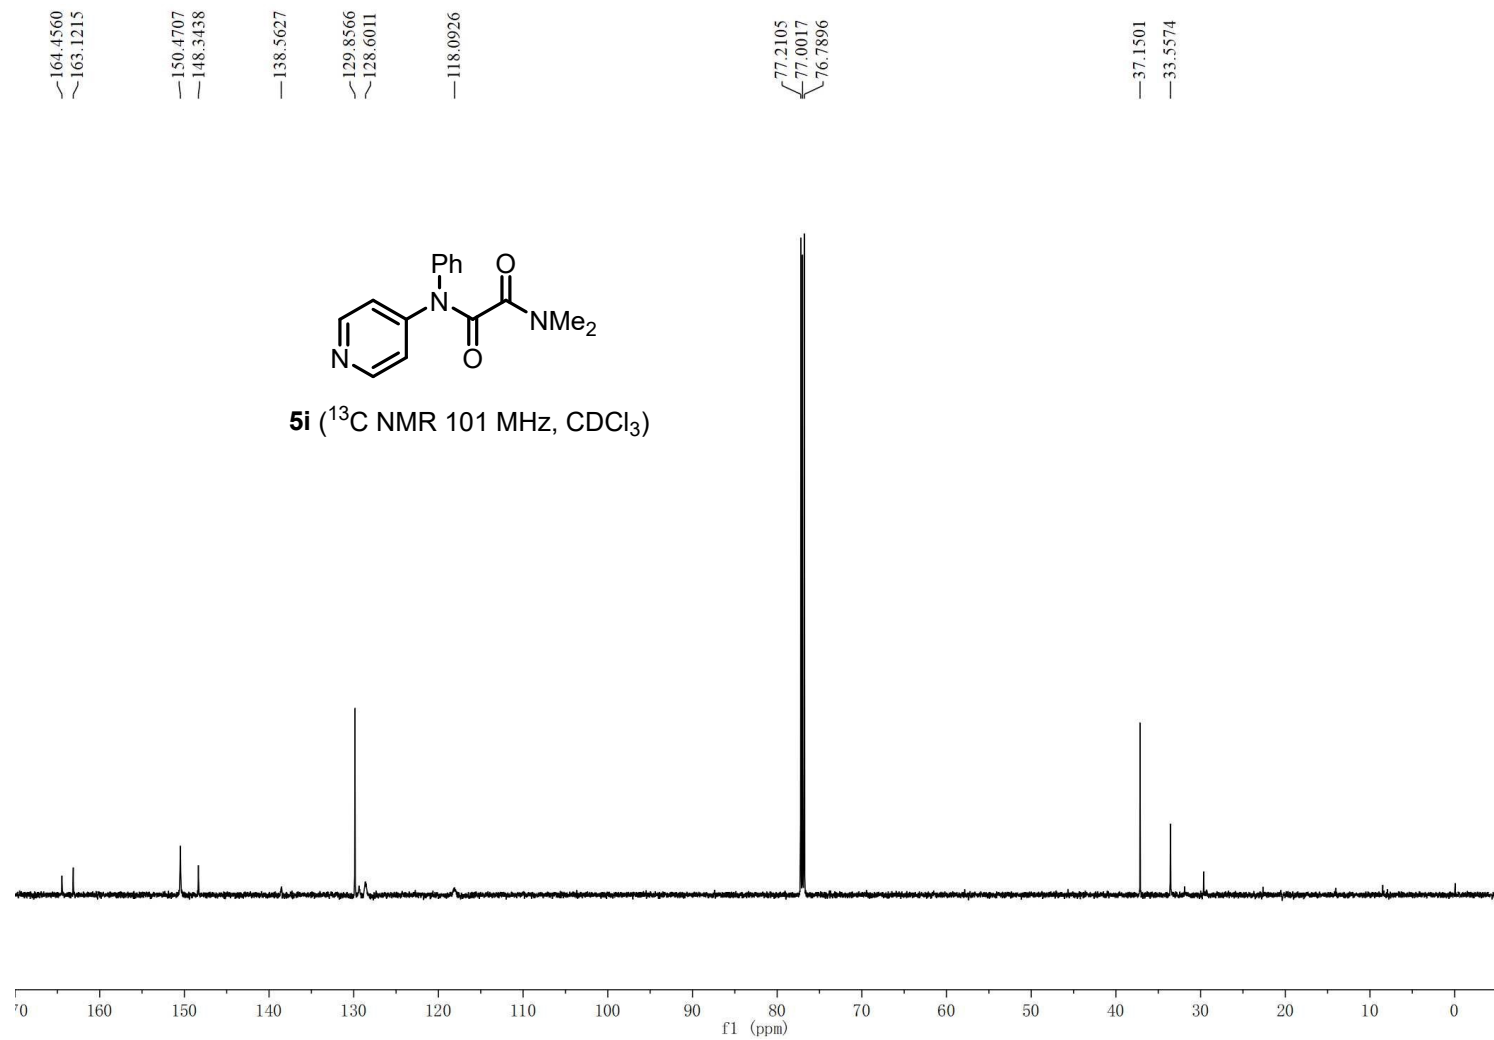

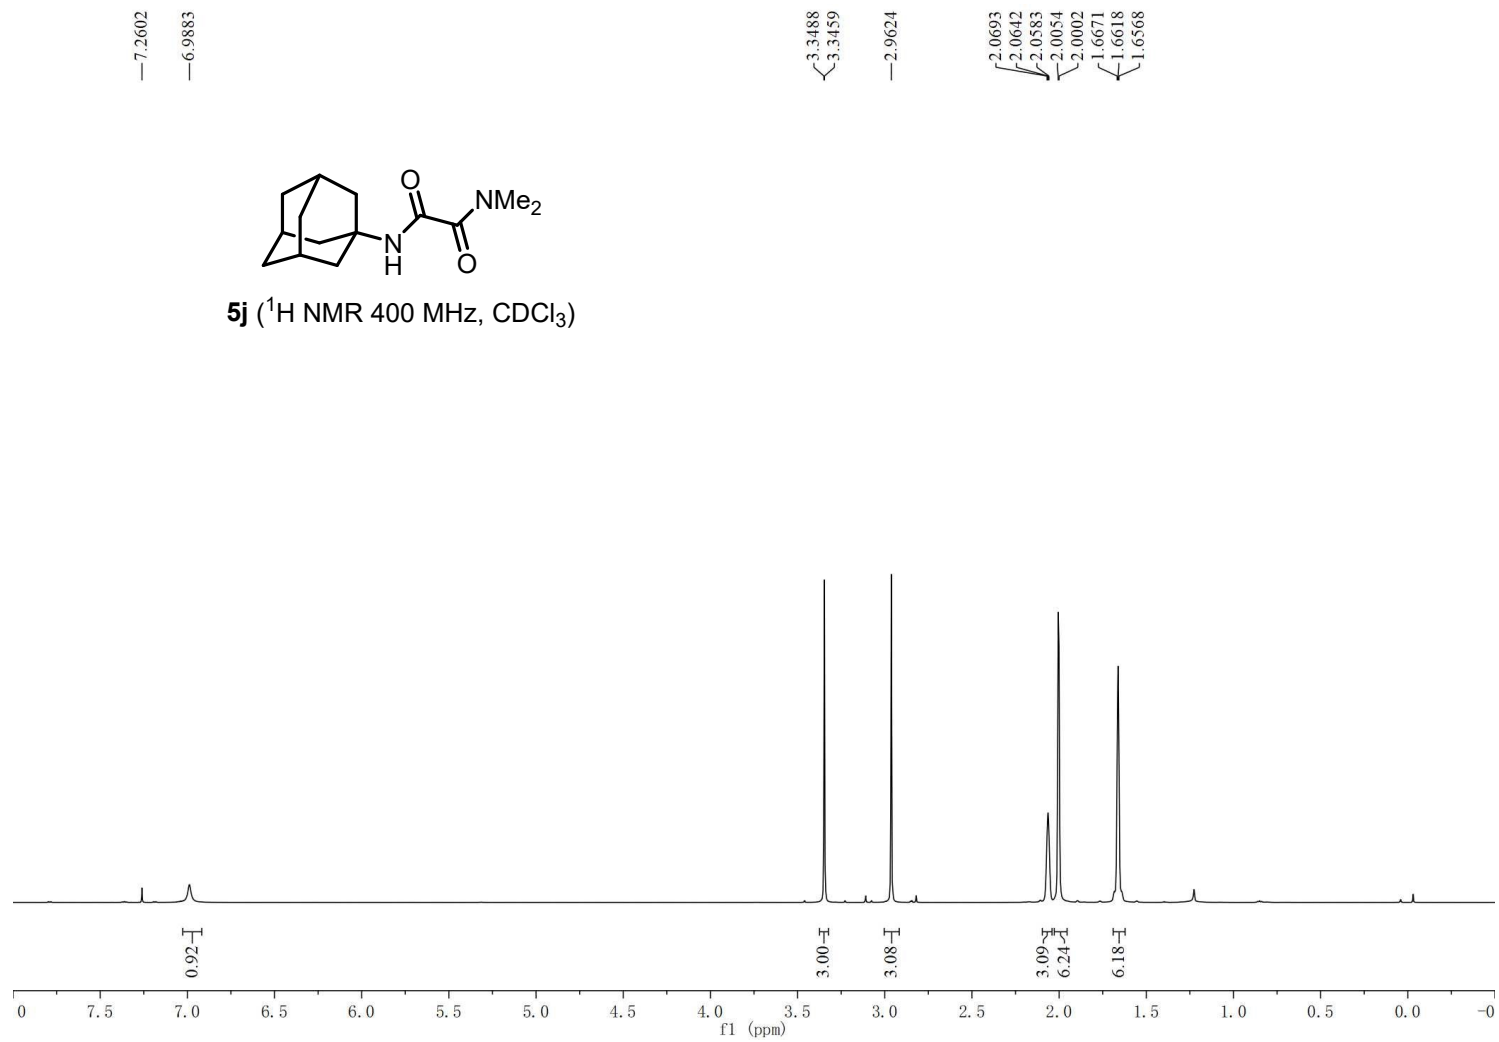

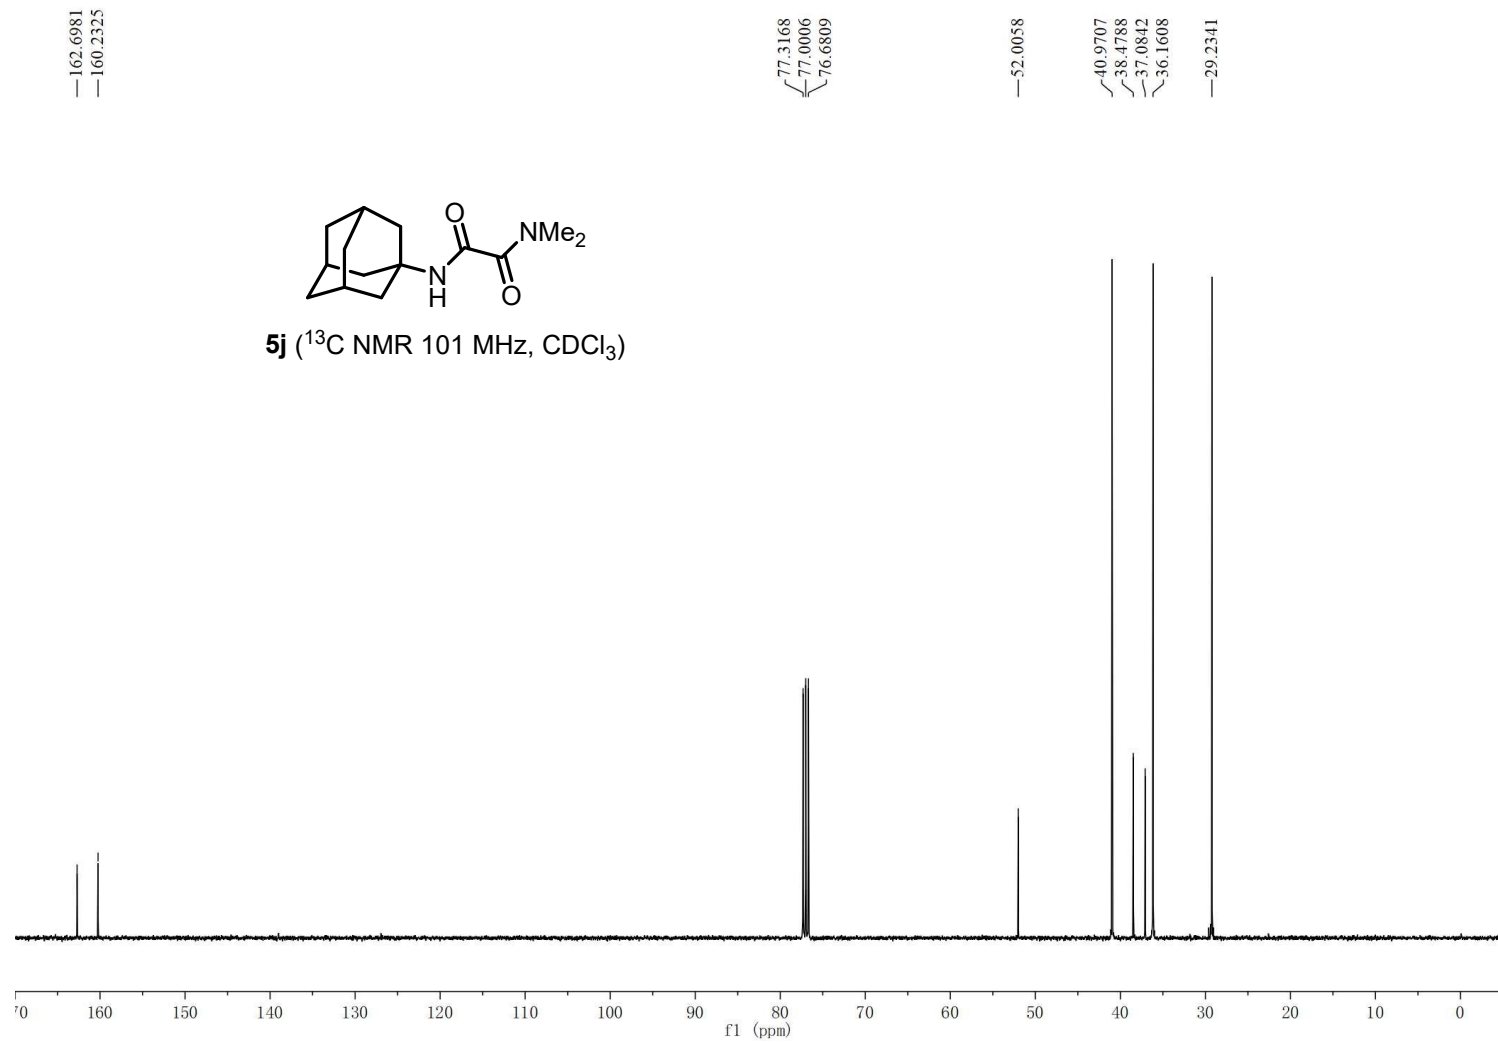

7.5033  
7.4926  
7.4819  
7.2605  
6.8178  
6.8045  
6.7444  
6.7408  
6.7310  
6.7274  
6.7072  
6.7038

3.8673  
3.8591  
3.5588  
3.5475  
3.5362  
3.5247

2.8085  
2.7965  
2.7846

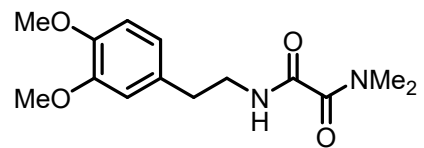

**5k** ( $^1\text{H}$  NMR 400 MHz,  $\text{CDCl}_3$ )

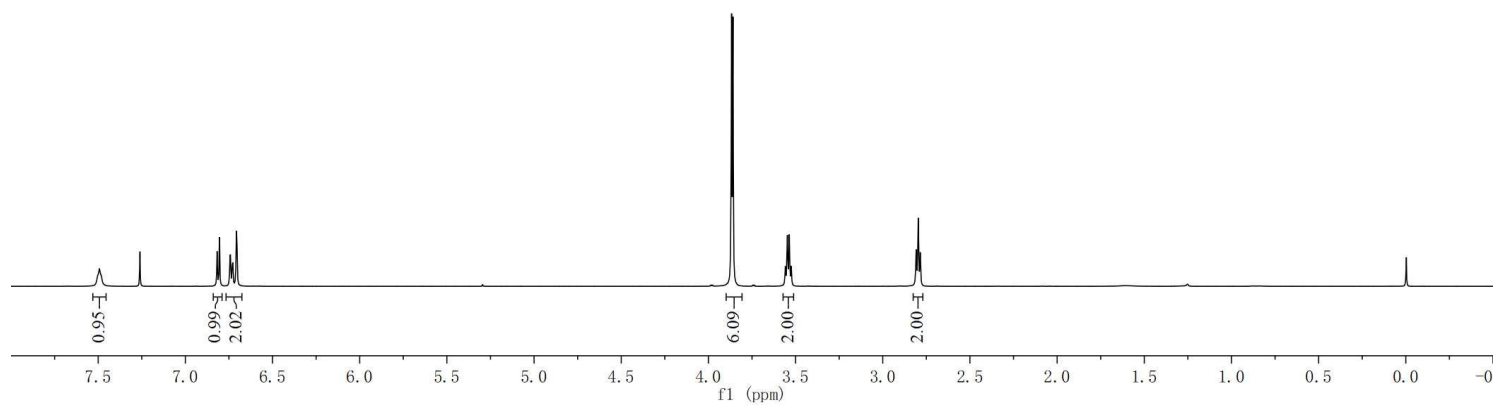

161.9885  
161.1413

149.0162  
147.7371

130.8804

120.6197

111.8063  
111.3589

77.3204  
77.2022  
77.0006  
76.6825

55.8678  
55.8244

40.5923  
38.3388  
37.0471  
35.0200  
29.6522

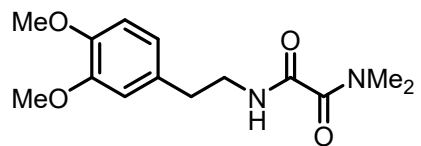

**5k** ( $^{13}\text{C}$  NMR 101 MHz,  $\text{CDCl}_3$ )

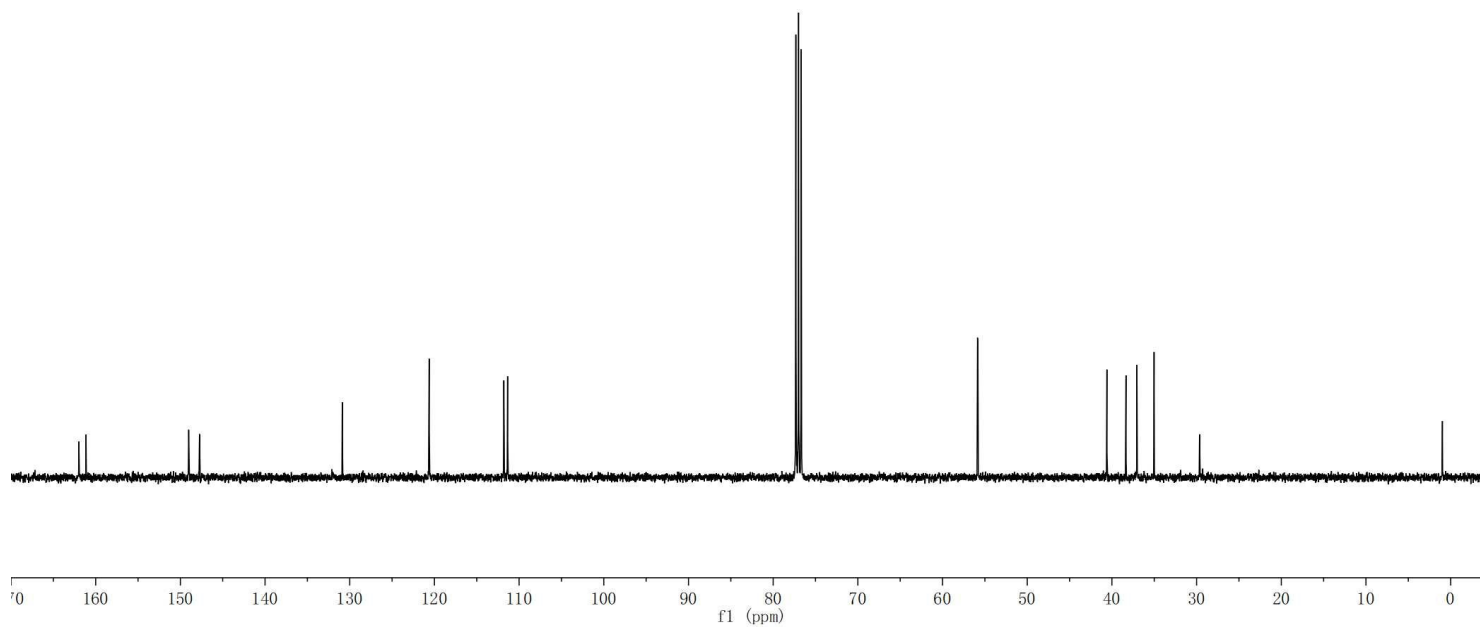

8.2642  
8.0259  
7.7003  
7.6830  
7.6792  
7.6700  
7.6529  
7.6490  
7.4961  
7.4887  
7.4802  
7.4766  
7.4726  
7.4695  
7.4589  
7.4558  
7.4523  
7.4373  
7.3521  
7.3326  
7.3143  
7.2597  
7.1947  
7.1912  
7.1731  
7.1567  
7.1533  
7.1306  
7.1268  
7.1236  
7.1208  
7.1114  
7.1090  
7.1070  
7.1044  
7.0897  
7.0866  
4.8564  
4.8527  
4.8488  
4.6072  
4.6031  
4.5995  
4.5960  
3.9858  
3.9787  
3.9671  
3.9633  
3.9566  
3.7742  
3.7712  
3.7588  
3.7456  
3.7426  
3.0645  
3.0414  
3.0312  
3.0160  
2.9621  
2.9595  
2.9053  
2.9015  
2.8979  
2.8895  
2.8831  
2.8726  
2.8689  
2.8428  
2.8386  
2.8334  
2.8286

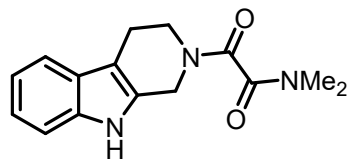

**5I** ( $^1\text{H}$  NMR 400 MHz,  $\text{CDCl}_3$ )

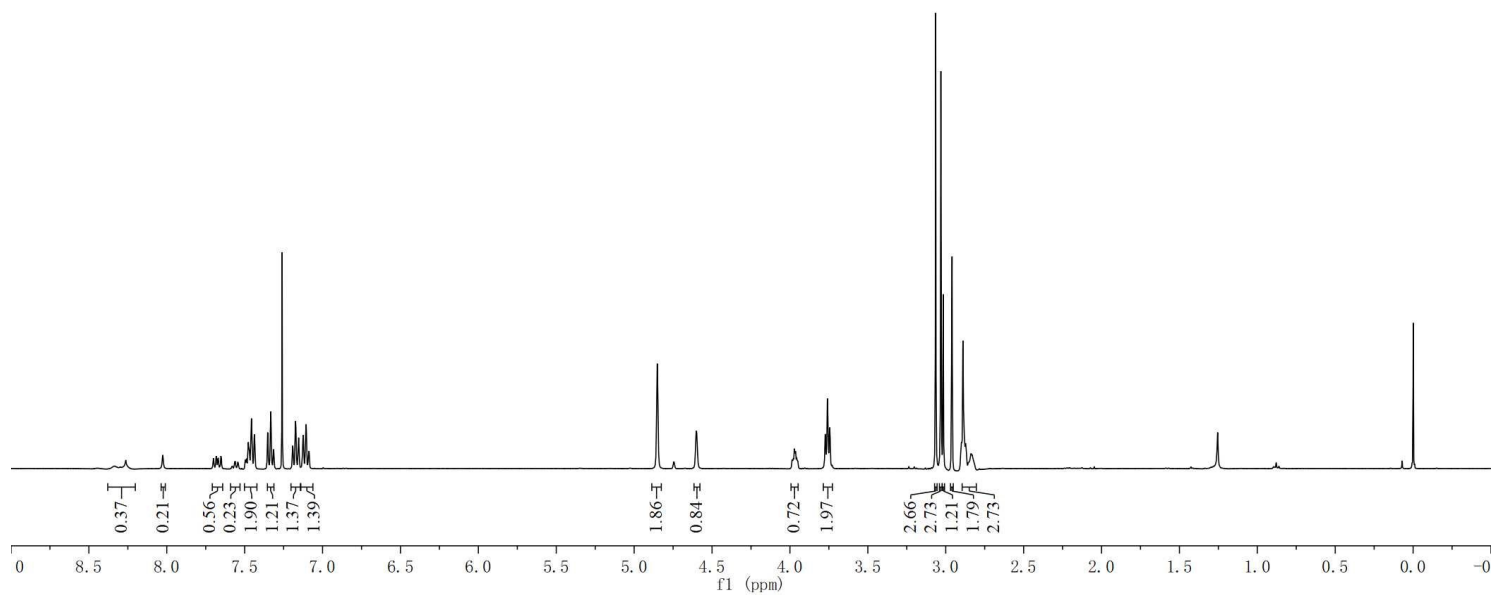



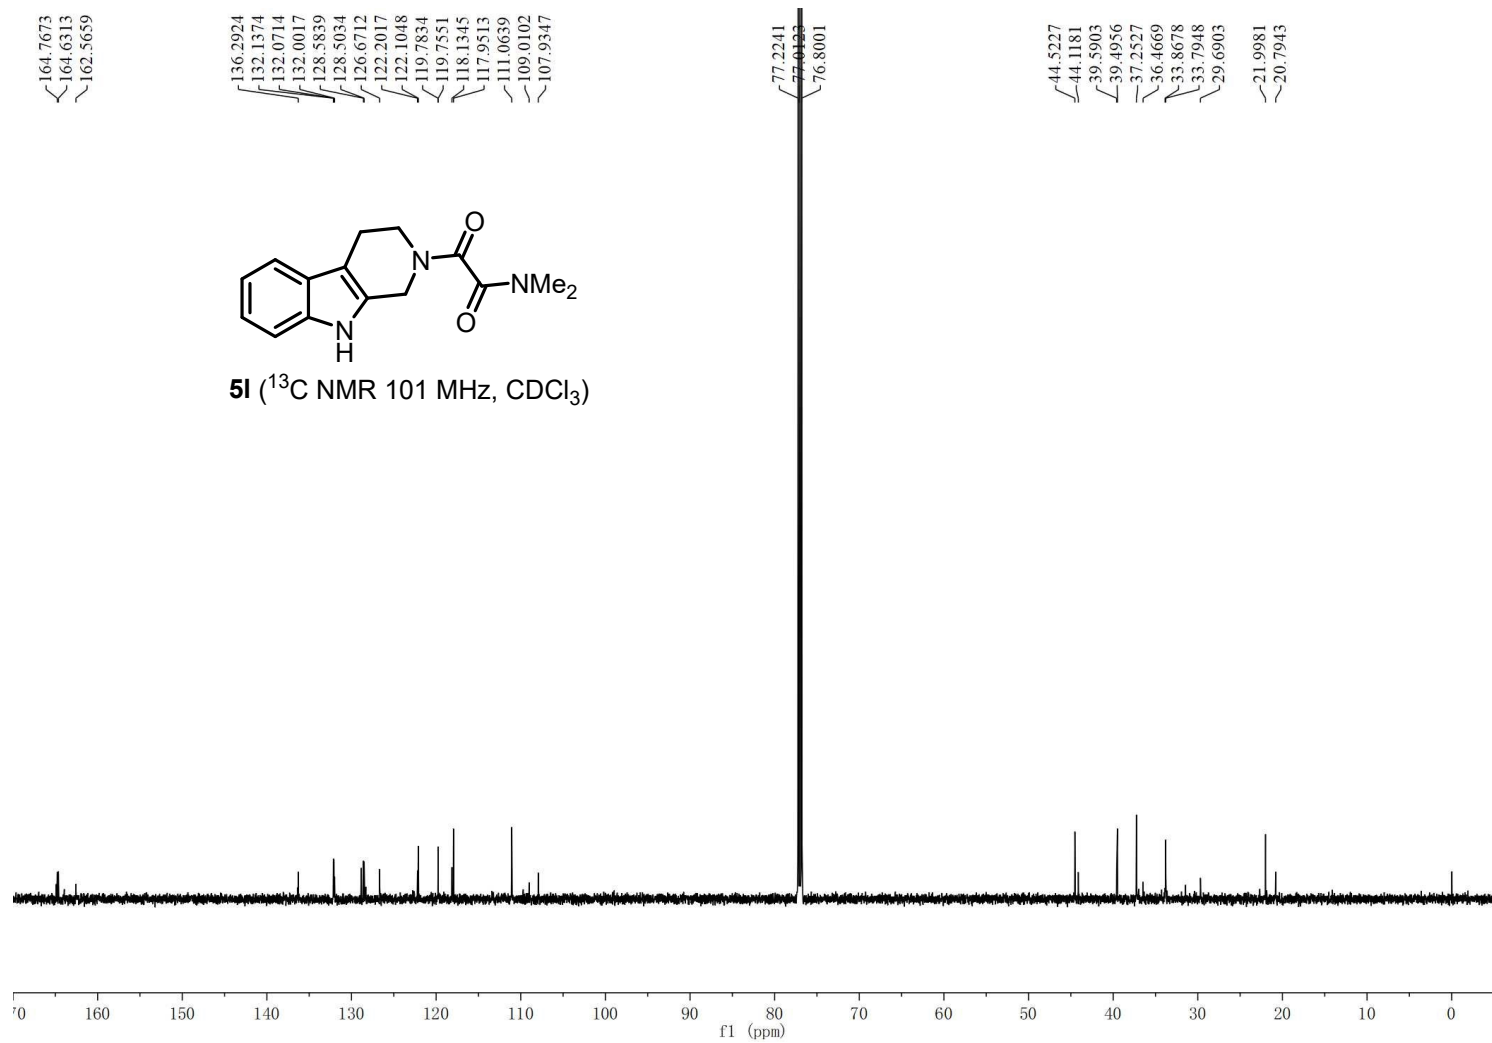

7.5900  
7.5874  
7.5874  
7.5718  
7.5687  
7.5658  
7.5059  
7.5027  
7.4976  
7.4932  
7.4887  
7.4162  
7.4117  
7.4070  
7.4034  
7.3941  
7.3893  
7.3833  
7.3748  
7.3698  
7.3658  
7.3628  
7.3500  
7.3466  
7.3435  
7.3414  
7.3338  
7.3313  
7.2602  
6.9953  
6.9662  
6.9431  
6.9140

— 2.8114  
— 2.6462

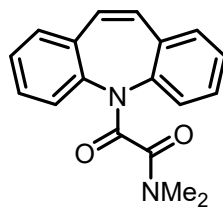

5m (<sup>1</sup>H NMR 400 MHz, CDCl<sub>3</sub>)

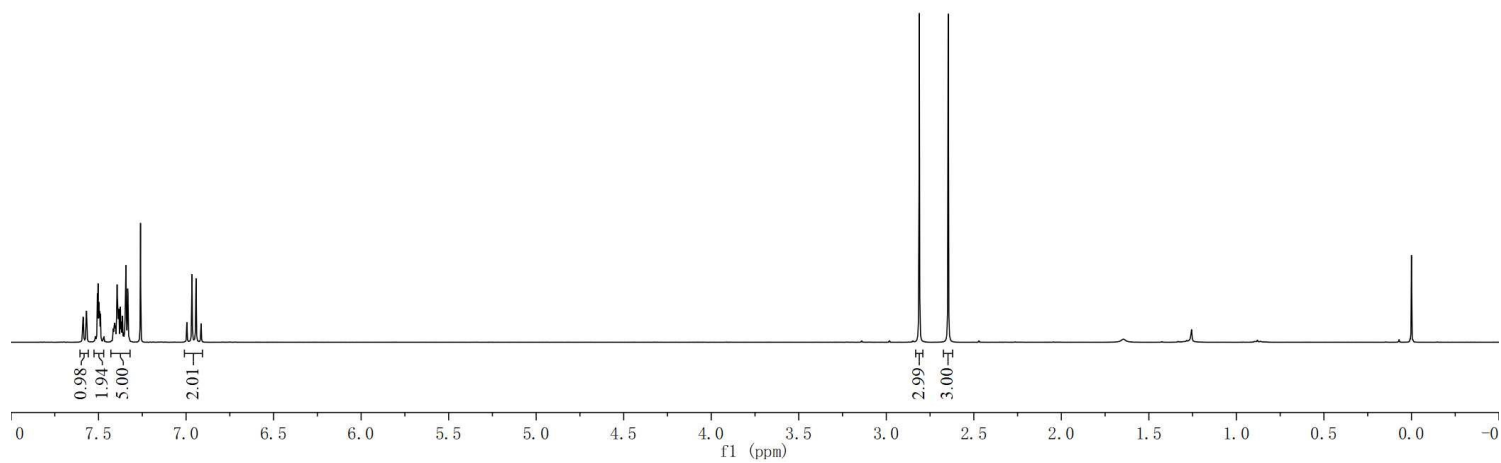

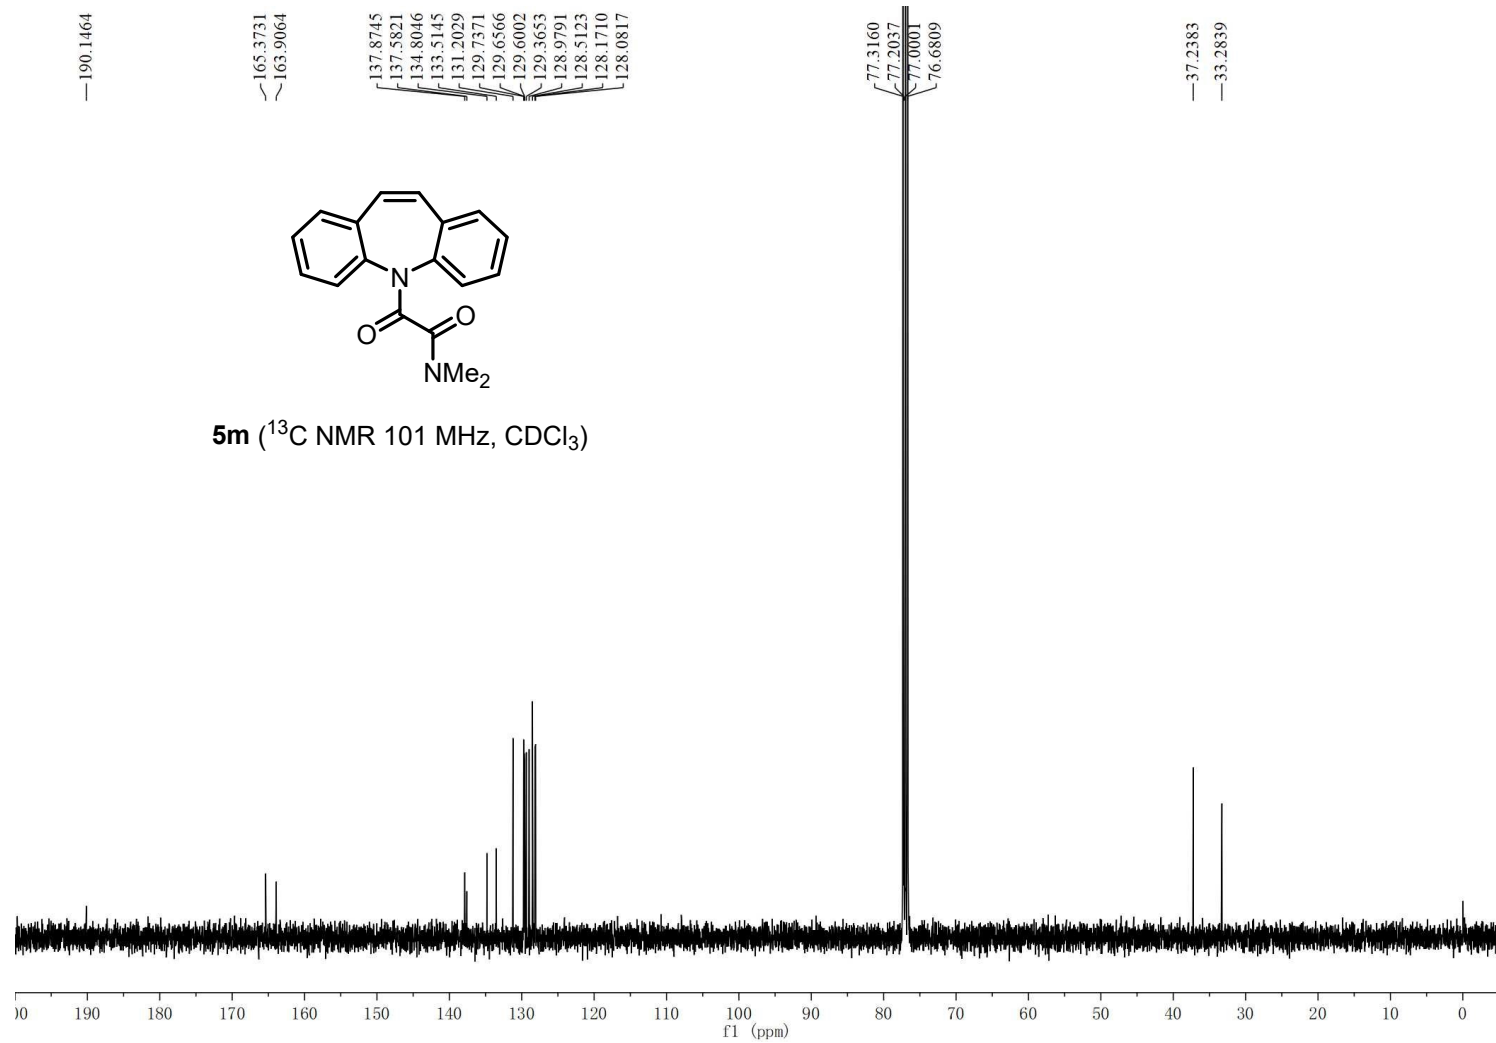

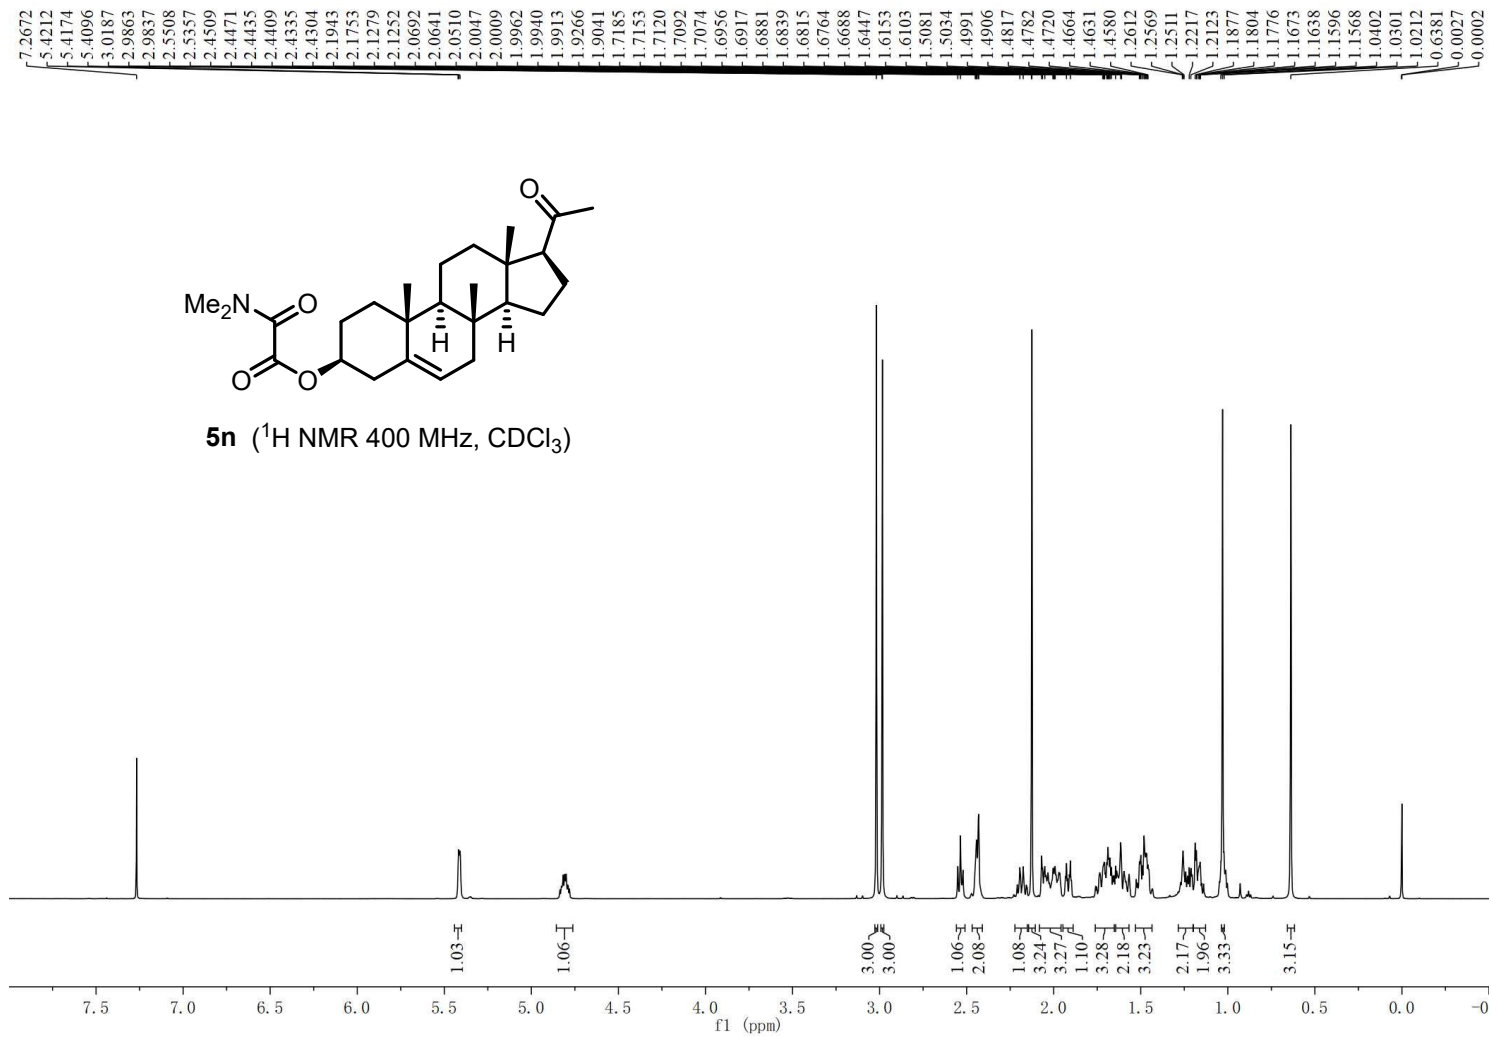

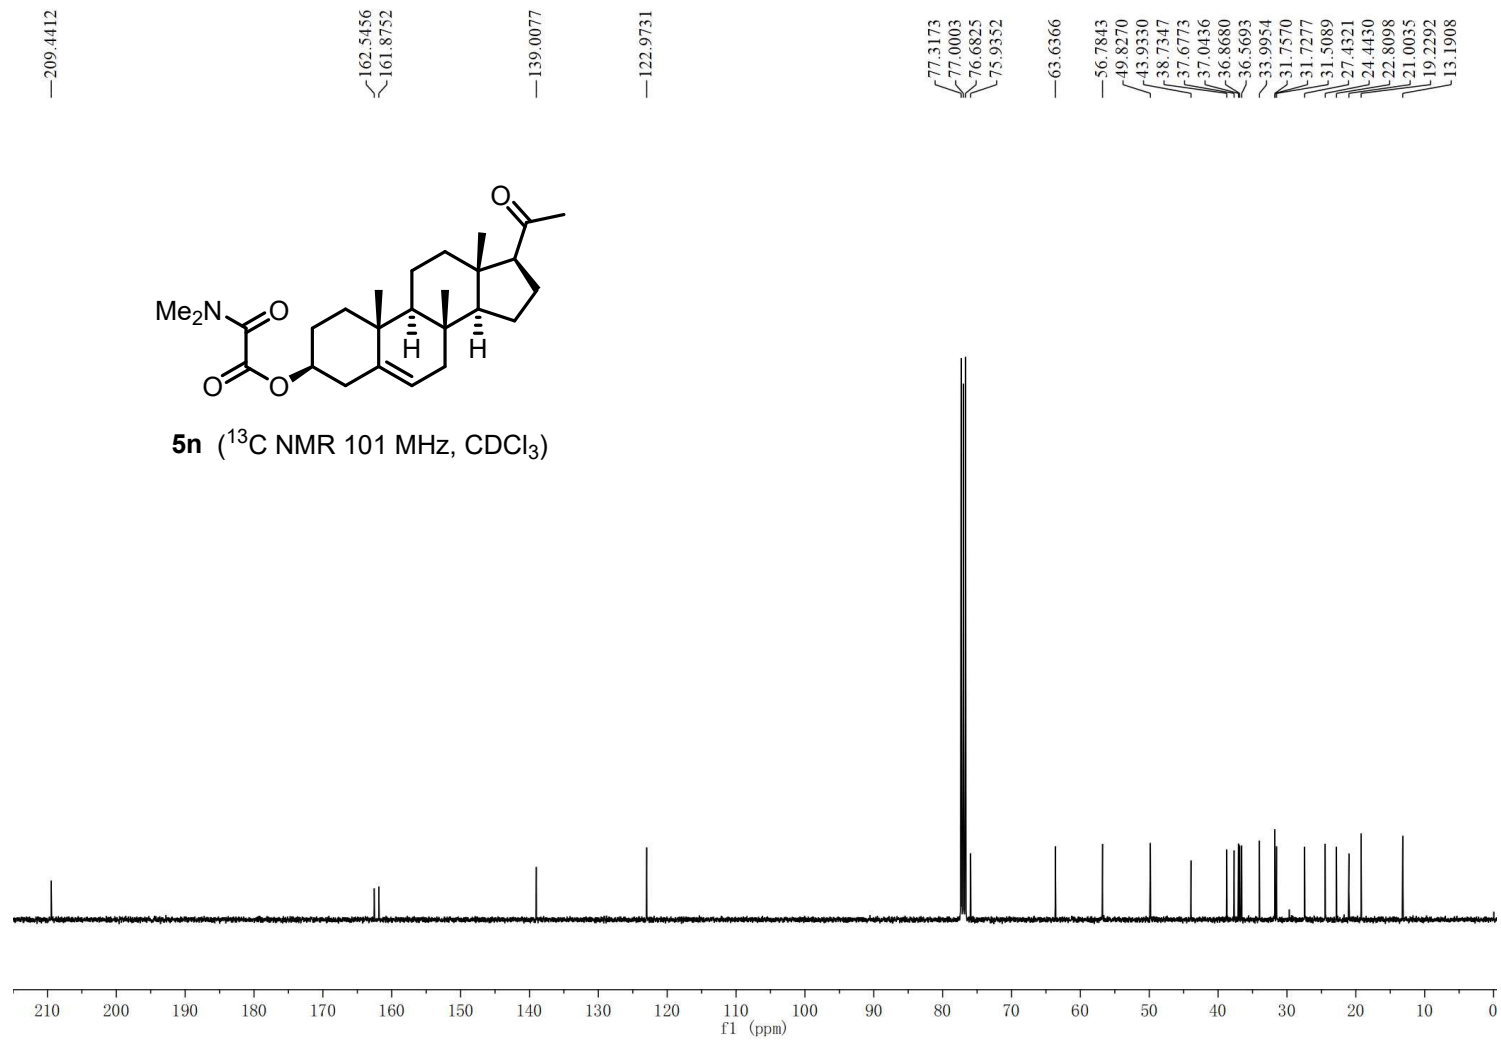

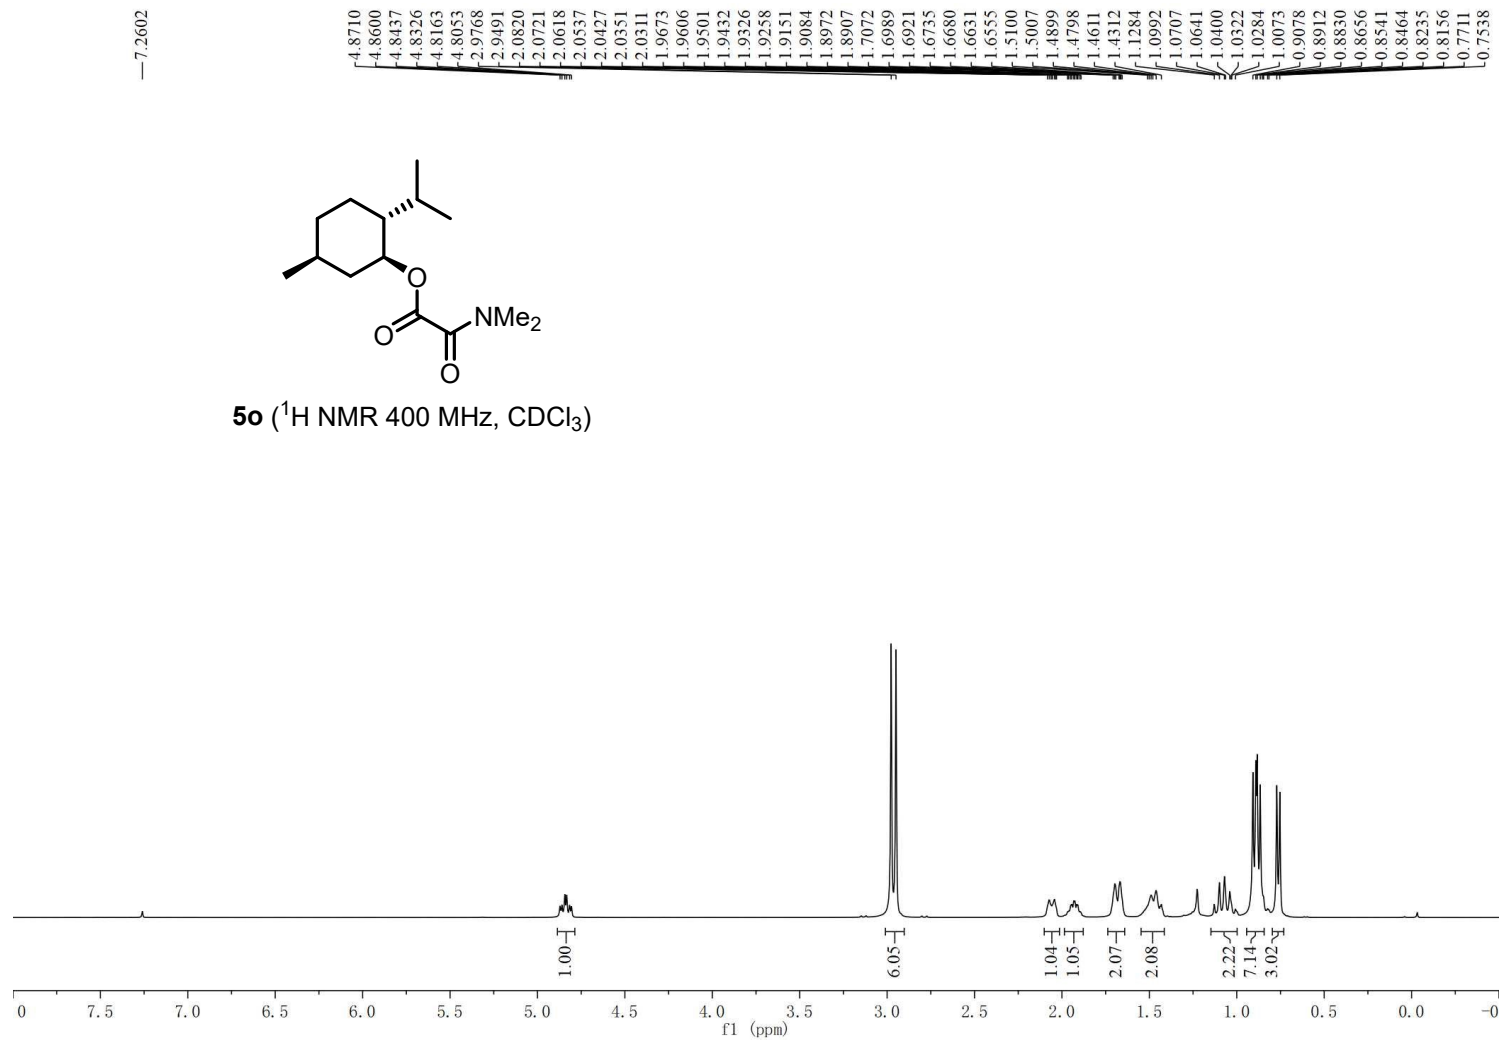

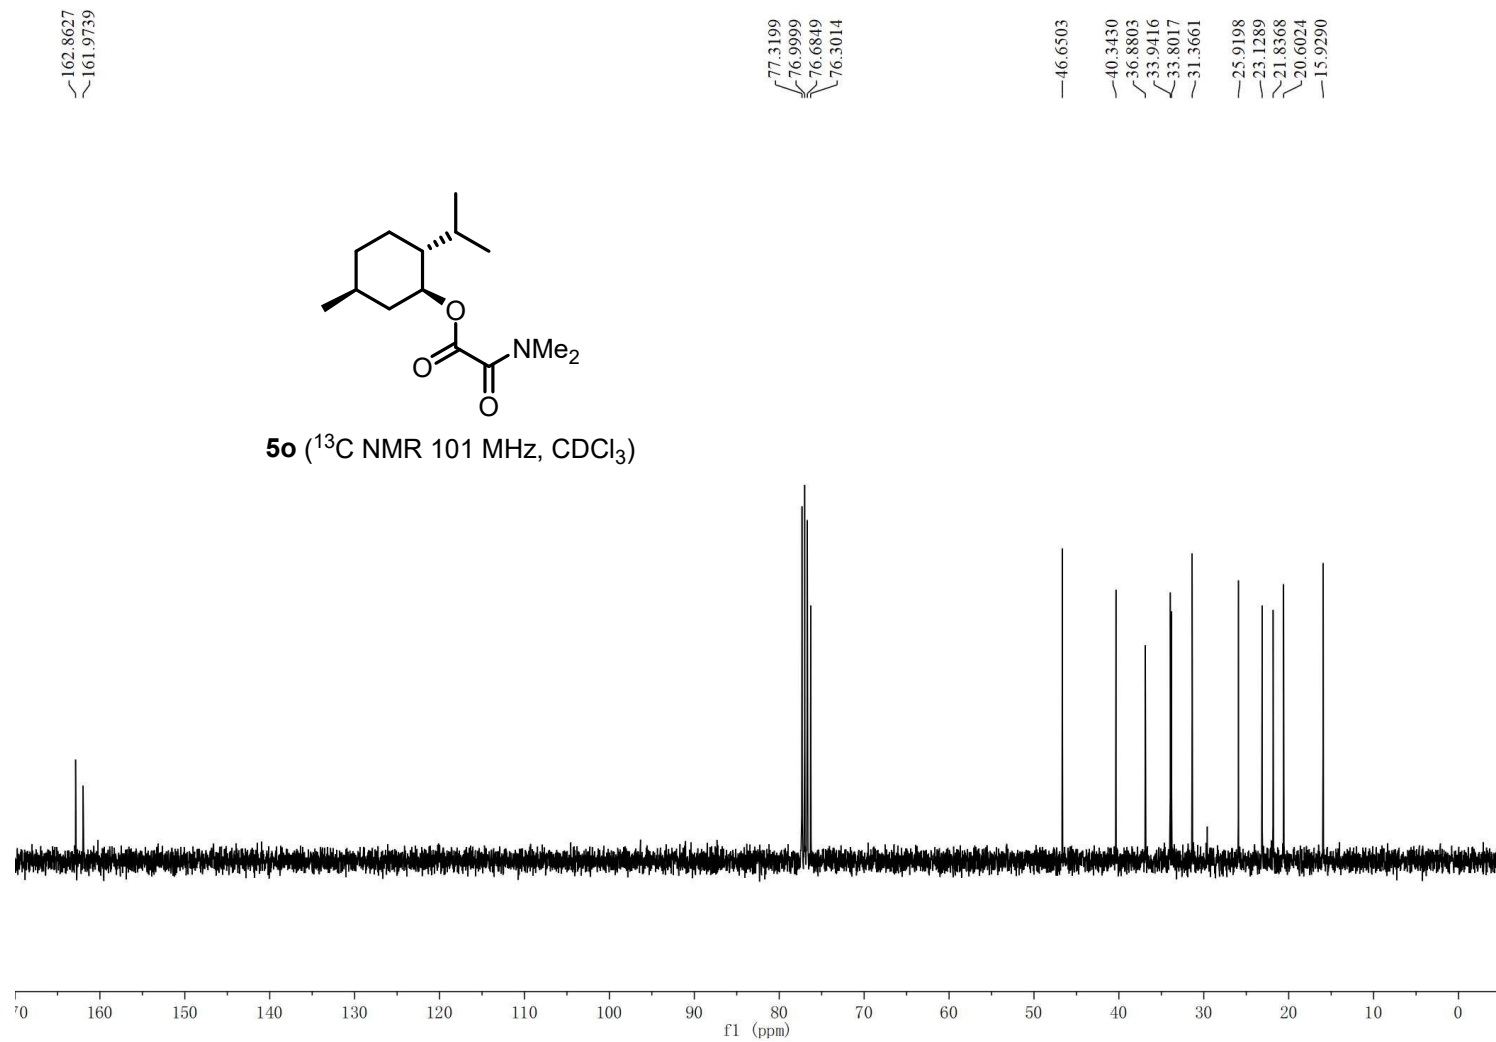

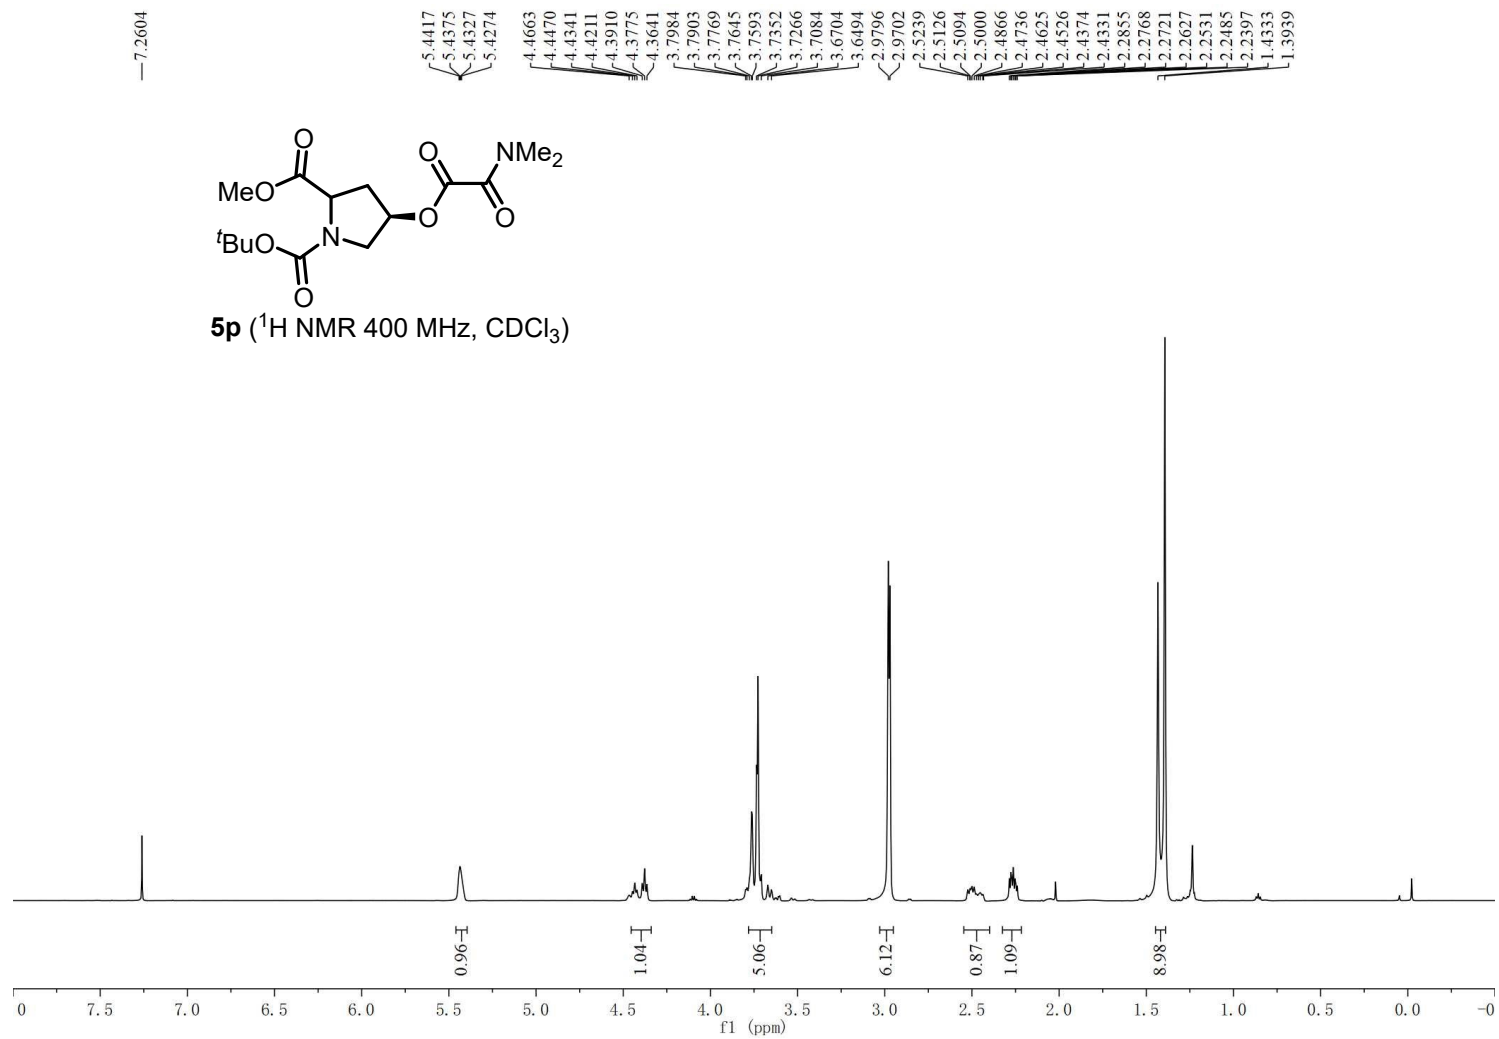



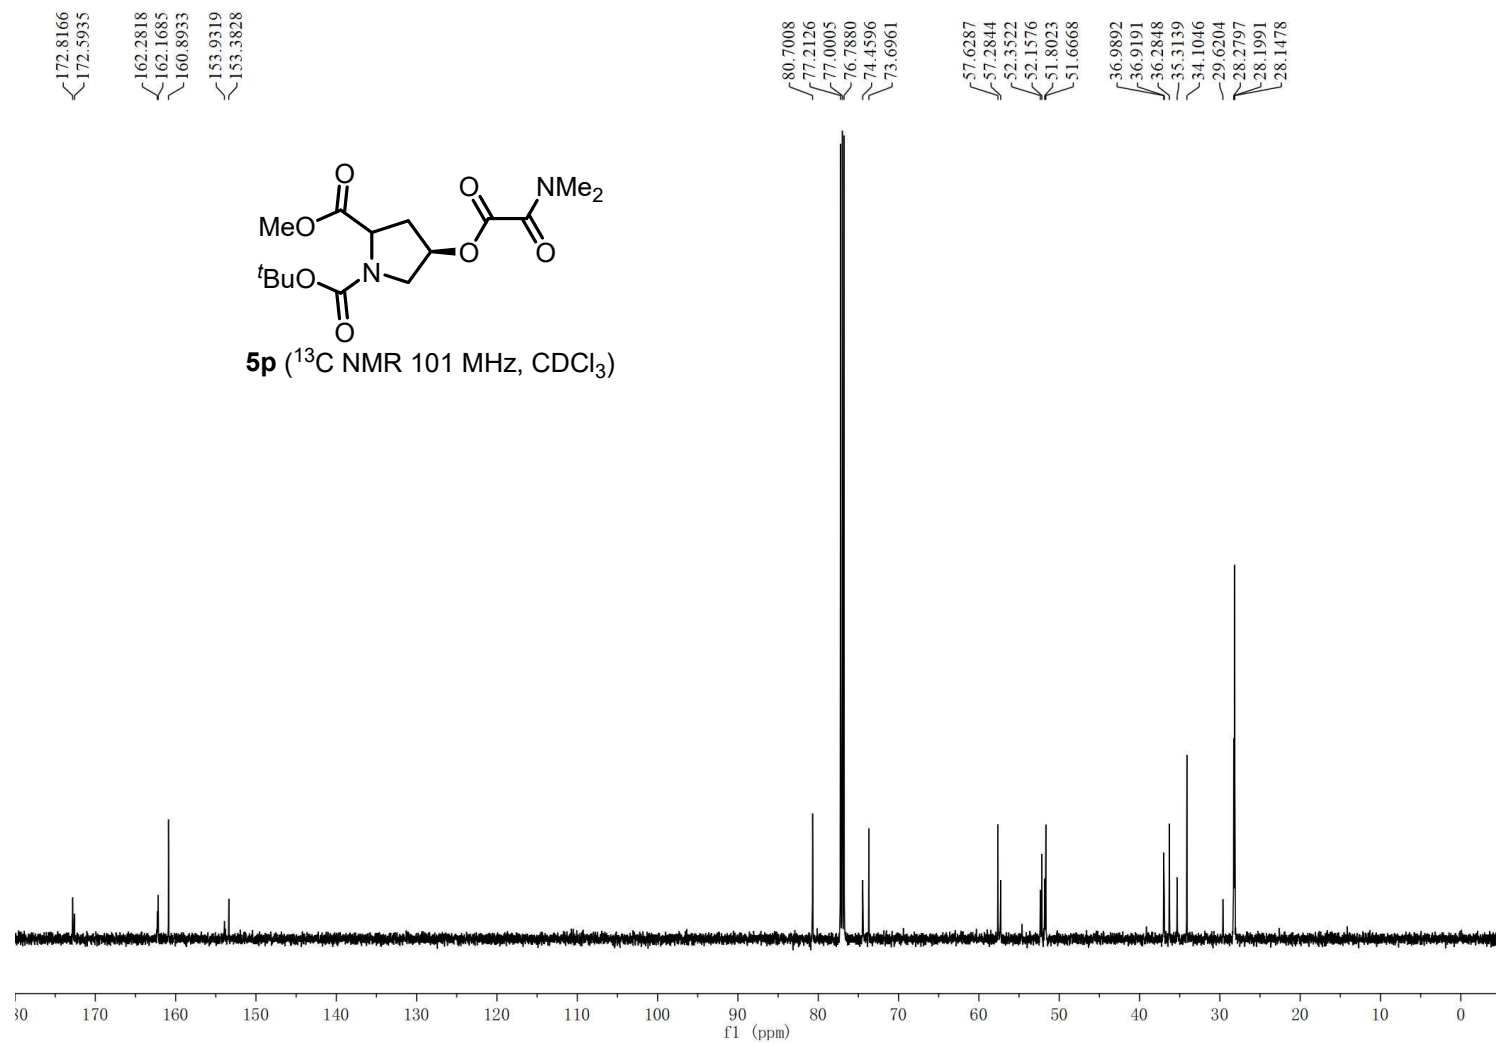

7.9550  
7.9387  
7.9348  
7.9308  
7.6630  
7.6595  
7.6439  
7.6408  
7.6257  
7.6221  
7.5288  
7.5257  
7.5084  
7.4902  
7.4872  
7.2603

3.7783  
3.7751  
3.6506  
3.6473  
3.6375  
3.6267  
3.6233  
3.3794  
3.3761  
3.3664  
3.3554  
3.3521

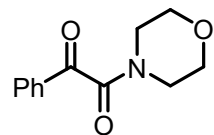

**6a** ( $^1\text{H}$  NMR 400 MHz,  $\text{CDCl}_3$ )

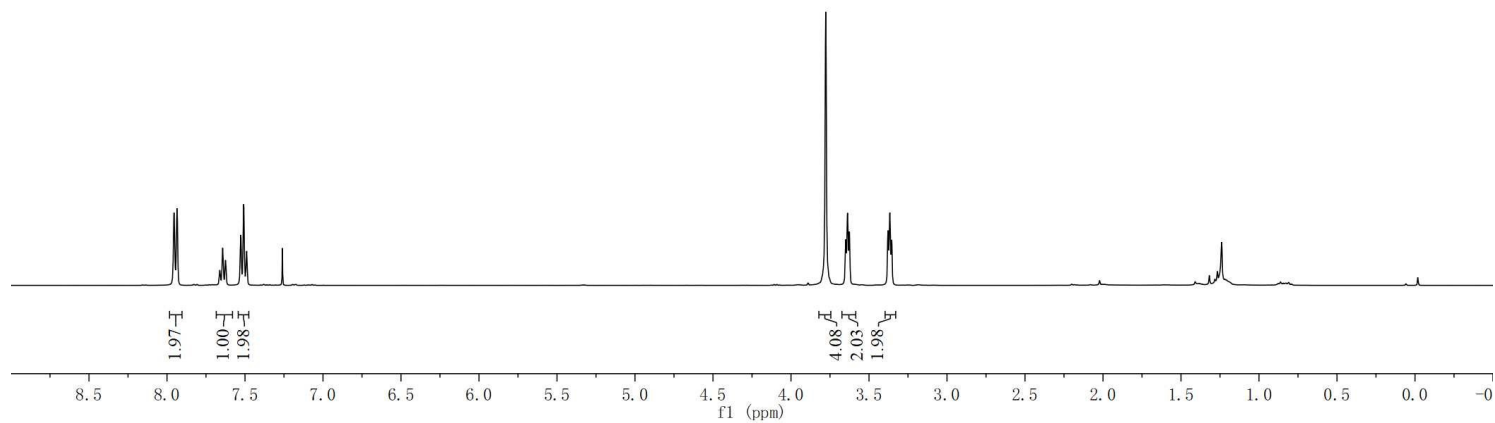

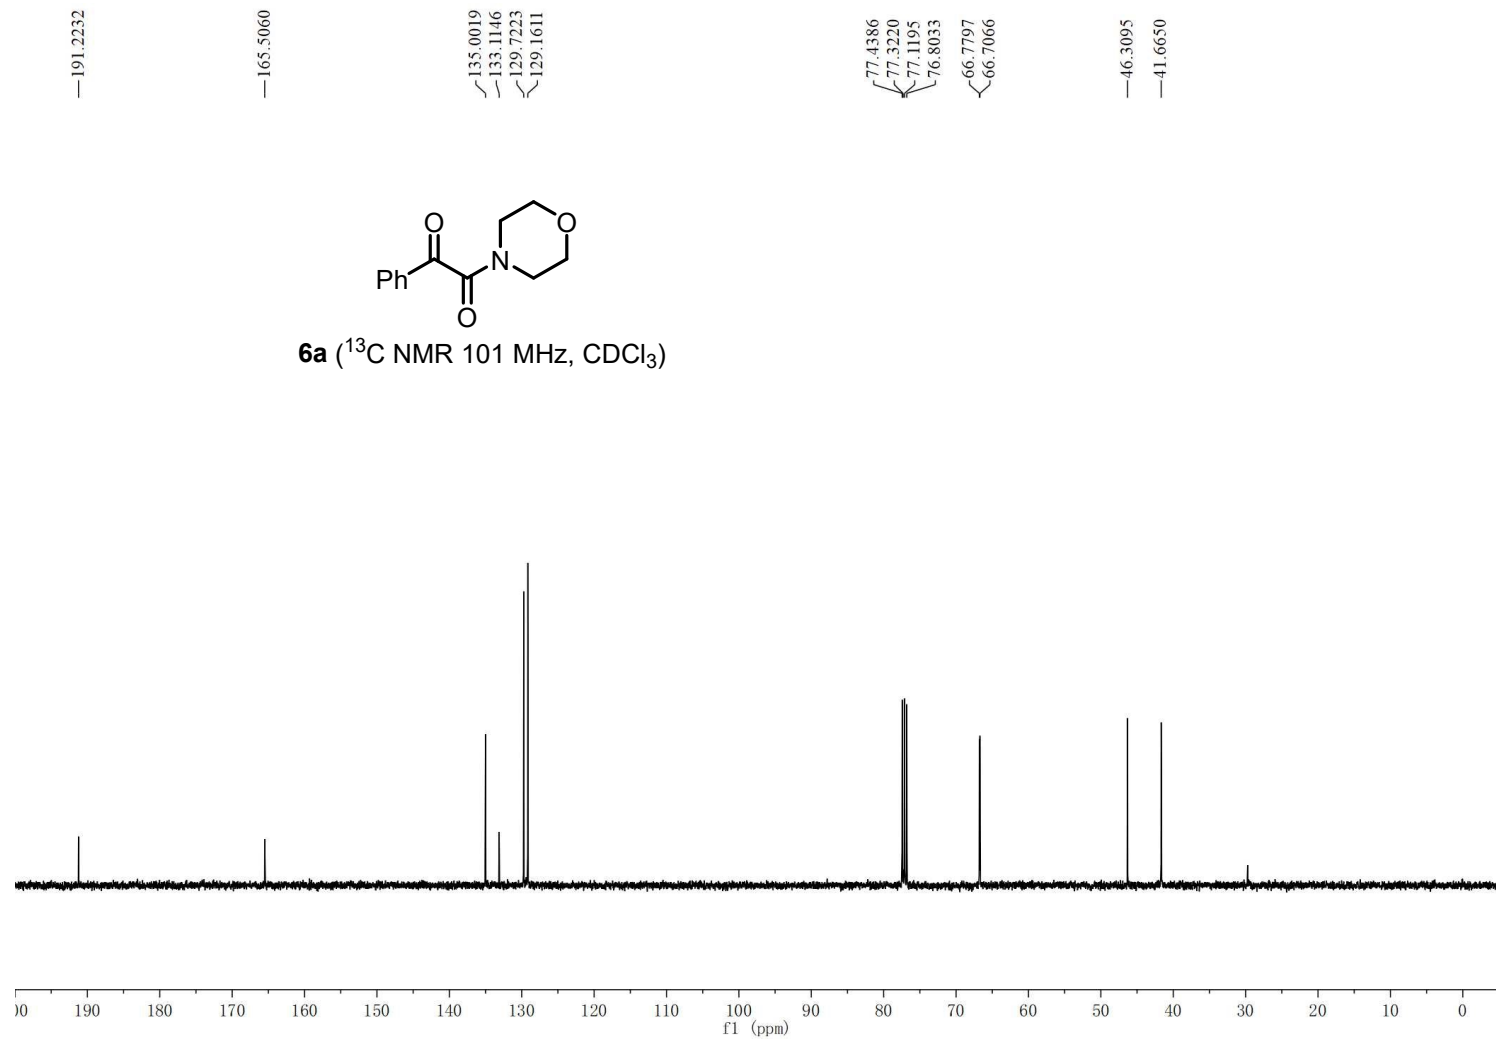

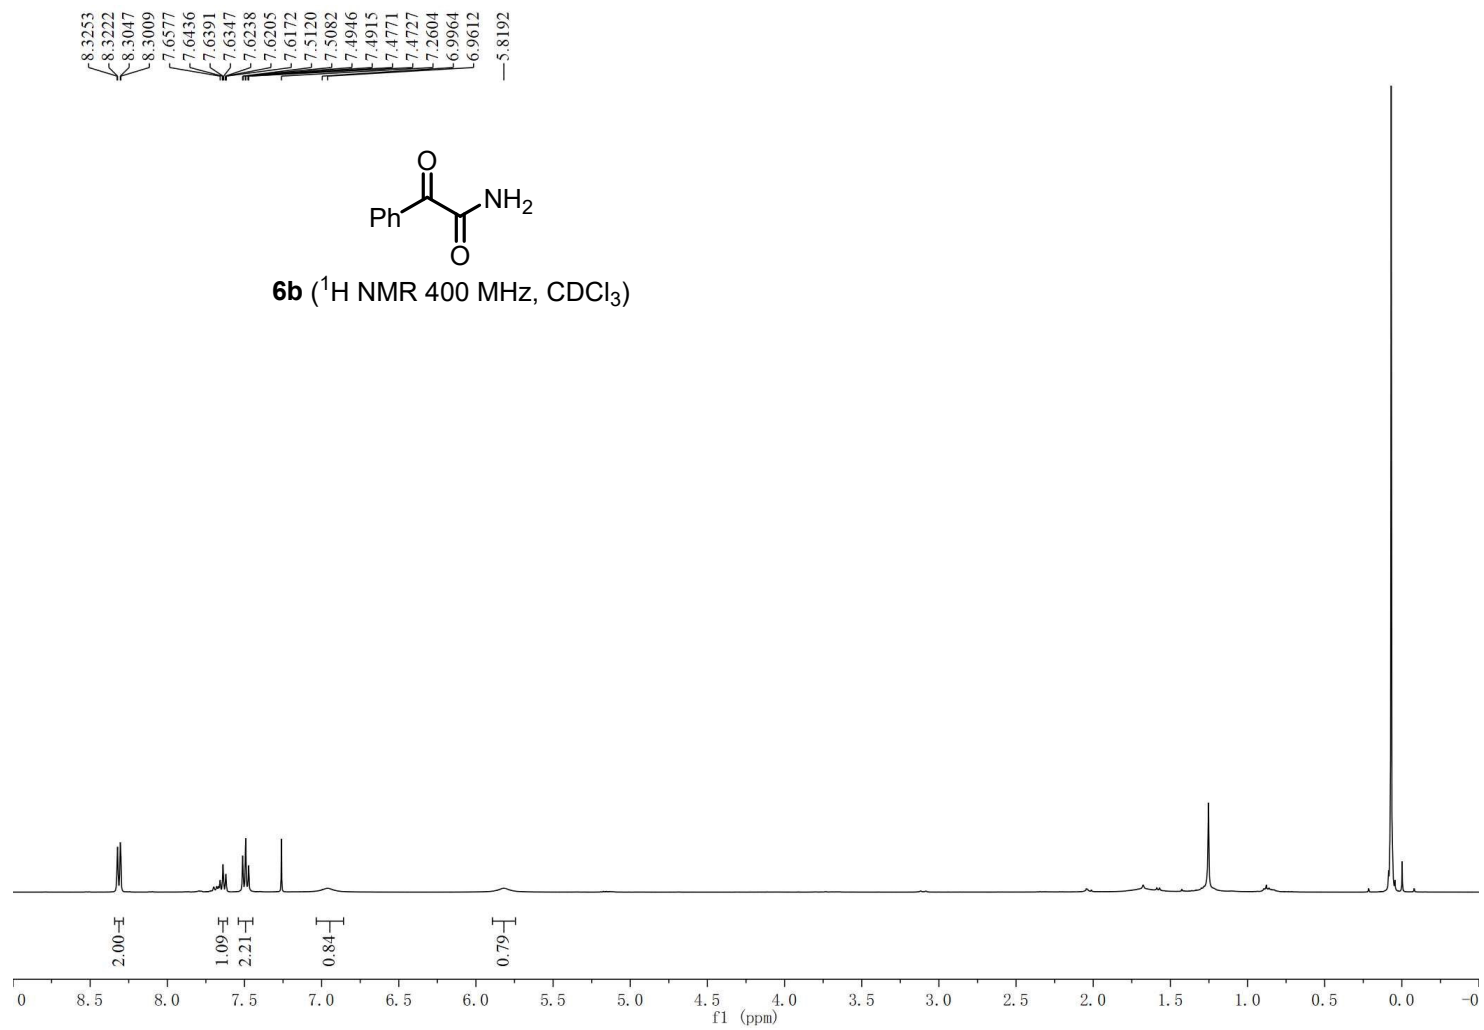

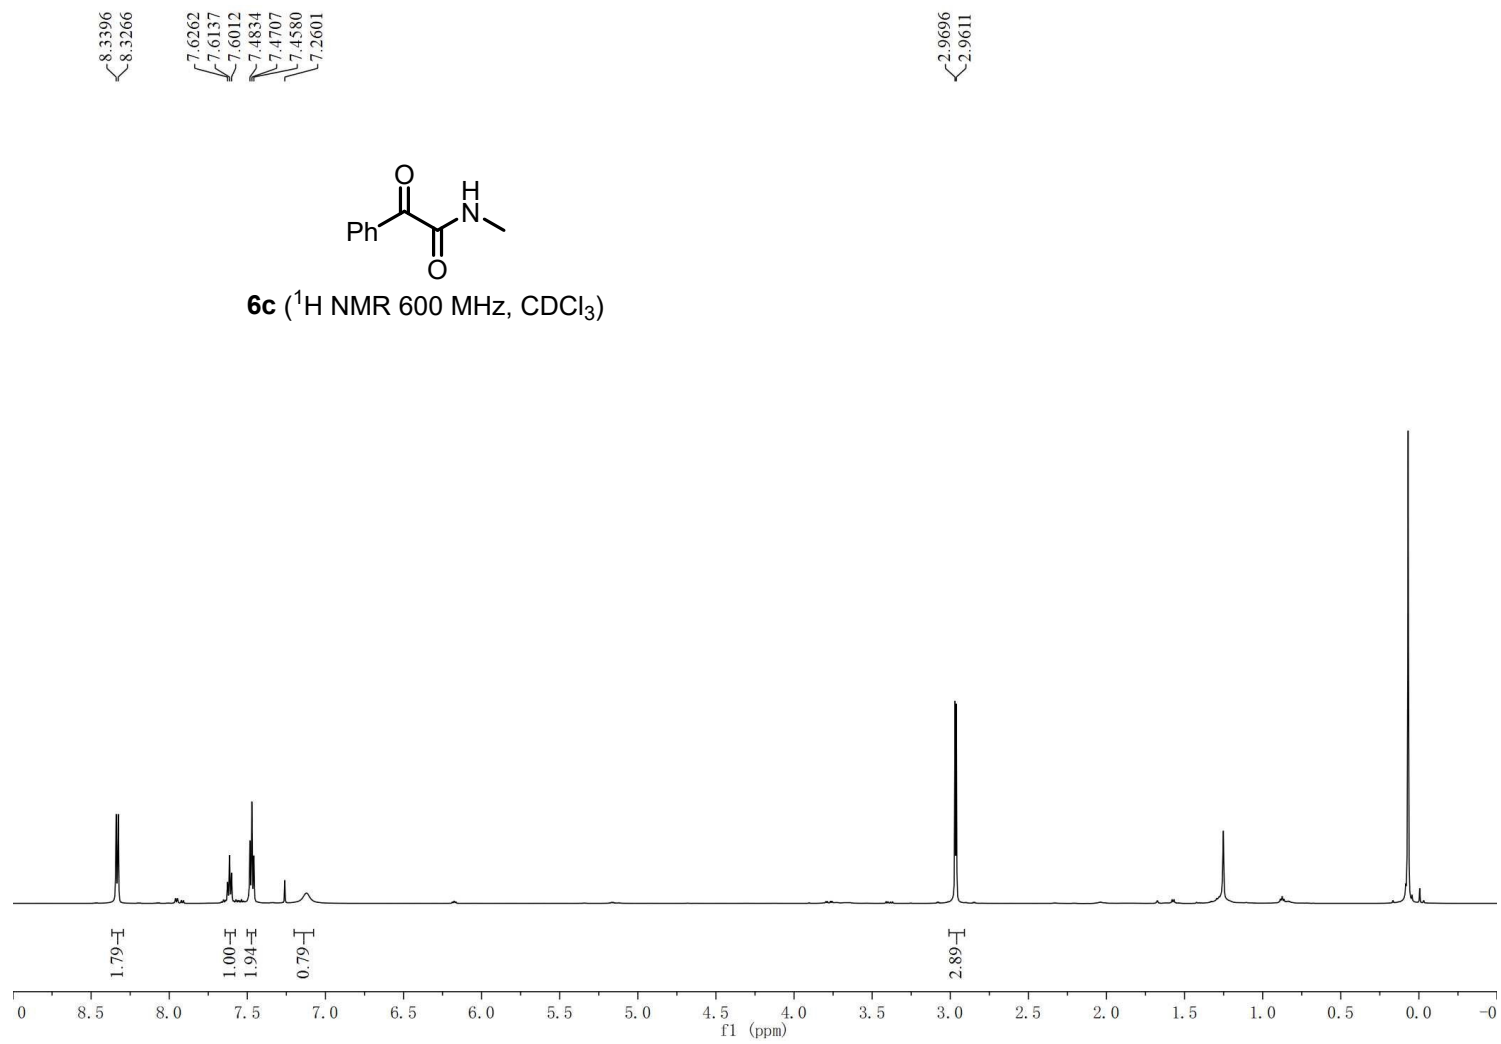

7.8237  
7.8209  
7.8036  
7.8008  
7.4027  
7.3998  
7.3838  
7.3810  
7.3651  
7.3622  
7.2605  
7.2184  
7.2142  
7.1995  
7.1952  
7.0803  
7.0761  
7.0610  
7.0568  
7.0418  
7.0376

3.1321  
2.8410

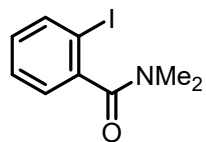

**7a** ( $^1\text{H}$  NMR 400 MHz,  $\text{CDCl}_3$ )

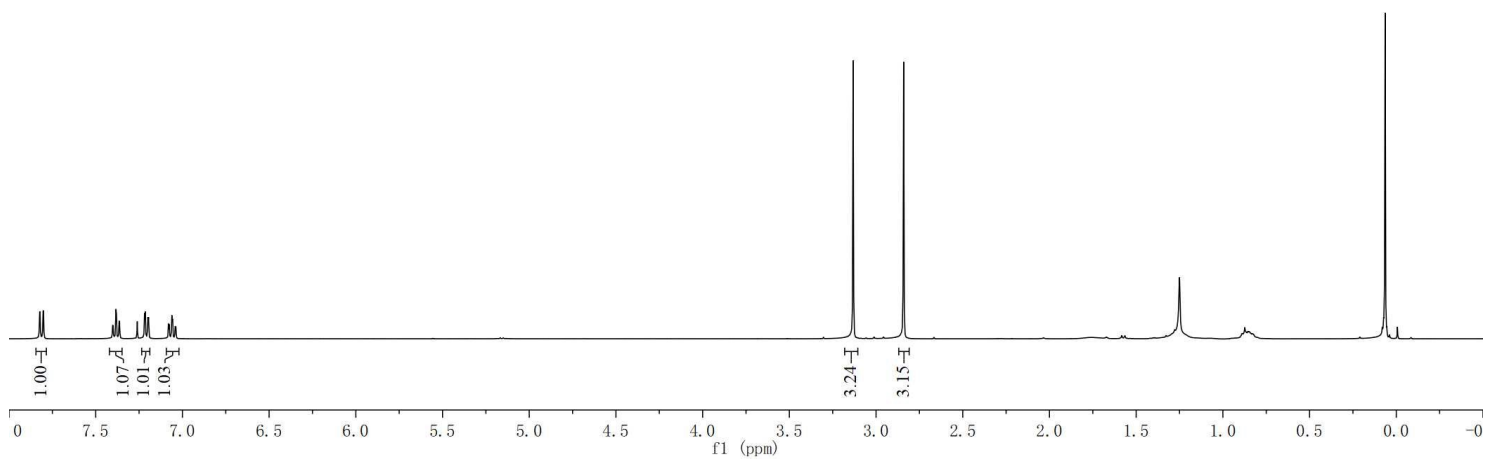

Supplement: d5qo01675d1.pdf [file d5qo01675d1.pdf]
